# Supplementary material for: Computational Study of Ortho-Substituent Effects on Antioxidant Activities of Phenolic Dendritic Antioxidants
Source: PubMed Central journal article supplement (PMC7139565; doi:10.3390/antiox9030189), 2020-02-25
Supplement: antioxidants-09-00189-s001.pdf [file antioxidants-09-00189-s001.pdf]

# Supplementary Information: Computational Study of *Ortho*-Substituent Effects on Antioxidant Activities of Phenolic Dendritic Antioxidants

Choon Young Lee<sup>1,\*</sup>, Ajit Sharma<sup>1</sup>, Julius Semanya<sup>1</sup>, Charles Anamoah<sup>1</sup>, Kelli N. Chapman<sup>1</sup> and Veronica Barone<sup>2,\*</sup>

<sup>1</sup> Department of Chemistry and Biochemistry, Central Michigan University, Mount Pleasant, Michigan 48859, USA

<sup>2</sup> Department of Physics and Science of Advanced Materials Program, Central Michigan University, Mount Pleasant, Michigan 48859, USA

\* Correspondence: [lee1cy@cmich.edu](mailto:lee1cy@cmich.edu) (C.Y.L.); [baron1v@cmich.edu](mailto:baron1v@cmich.edu) (V.B.)

## Table of Contents

|                                                                       |           |
|-----------------------------------------------------------------------|-----------|
| <b>S1. DFT calculations in methanol:</b> .....                        | <b>2</b>  |
| <b>S1.0 - Reference Compound</b> .....                                | <b>2</b>  |
| <b>S1.1 - Compound 1</b> .....                                        | <b>10</b> |
| <b>S1.2- Compound 2</b> .....                                         | <b>20</b> |
| <b>S1.3-Compound 3</b> .....                                          | <b>31</b> |
| <b>S1.4-Compound 4</b> .....                                          | <b>40</b> |
| <b>S1.5- Compound 5</b> .....                                         | <b>49</b> |
| <b>S2. Values of pKa obtained using ChemAxon pKa calculator</b> ..... | <b>58</b> |
| <b>S3. Multistep DFT calculations in methanol:</b> .....              | <b>59</b> |
| <b>S3.0 - Reference</b> .....                                         | <b>59</b> |
| <b>S3.1- Compound 1</b> .....                                         | <b>63</b> |
| <b>S3.2 - Compound 2</b> .....                                        | <b>68</b> |
| <b>S3.3 - Compound 3</b> .....                                        | <b>73</b> |
| <b>S3.4 - Compound 4</b> .....                                        | <b>78</b> |
| <b>S3.5 - Compound 5</b> .....                                        | <b>82</b> |

## S1. DFT calculations in methanol:

### Information ordered as follows:

Molecule (Charge, spin multiplicity), Enthalpies (au), lowest frequencies ( $\text{cm}^{-1}$ ), and, optimized geometries (Cartesian, Å) of Compounds **1** to **5** as well as reference obtained at the B3LYP/6-311++G\*\*

#### S1.0 - Reference Compound

ArOH (0,1)

Sum of electronic and thermal Enthalpies= -1207.754766

Frequencies -- 14.0287 22.2730 26.6668

| Center Number | Atomic Number | Atomic Type | Coordinates (Angstroms) |           |           |
|---------------|---------------|-------------|-------------------------|-----------|-----------|
|               |               |             | X                       | Y         | Z         |
| 1             | 7             | 0           | 0.545298                | -0.002838 | -1.059804 |
| 2             | 6             | 0           | 1.750102                | 0.800269  | -1.344702 |
| 3             | 6             | 0           | 1.775420                | 2.142082  | -0.643979 |
| 4             | 6             | 0           | 1.747246                | 3.339929  | -1.365814 |
| 5             | 6             | 0           | 1.858147                | 2.221222  | 0.751796  |
| 6             | 6             | 0           | 1.797251                | 4.578184  | -0.726861 |
| 7             | 6             | 0           | 1.905407                | 3.448891  | 1.407252  |
| 8             | 6             | 0           | 1.875209                | 4.631399  | 0.663955  |
| 9             | 8             | 0           | 1.922012                | 5.872491  | 1.254205  |
| 10            | 6             | 0           | 0.729951                | -1.399489 | -1.500524 |
| 11            | 6             | 0           | 1.713054                | -2.184530 | -0.658590 |
| 12            | 6             | 0           | 1.431254                | -2.483014 | 0.681961  |
| 13            | 6             | 0           | 2.913450                | -2.658322 | -1.194541 |
| 14            | 6             | 0           | 2.315221                | -3.220565 | 1.462132  |
| 15            | 6             | 0           | 3.811919                | -3.402258 | -0.427362 |
| 16            | 6             | 0           | 3.510618                | -3.681149 | 0.904627  |
| 17            | 8             | 0           | 4.350449                | -4.406590 | 1.716447  |
| 18            | 6             | 0           | -0.643700               | 0.594049  | -1.697005 |
| 19            | 6             | 0           | -1.959487               | 0.028568  | -1.204692 |
| 20            | 6             | 0           | -2.335515               | 0.189069  | 0.139680  |
| 21            | 6             | 0           | -2.832215               | -0.625723 | -2.072433 |
| 22            | 6             | 0           | -3.553462               | -0.300535 | 0.596606  |
| 23            | 6             | 0           | -4.061641               | -1.116644 | -1.620623 |
| 24            | 6             | 0           | -4.425125               | -0.957984 | -0.293213 |
| 25            | 8             | 0           | -5.633078               | -1.441210 | 0.144490  |
| 26            | 8             | 0           | -4.022936               | -0.202140 | 1.880236  |
| 27            | 6             | 0           | -3.205807               | 0.448244  | 2.862506  |
| 28            | 1             | 0           | 2.612129                | 0.214854  | -1.015617 |
| 29            | 1             | 0           | 1.868684                | 0.955227  | -2.430804 |
| 30            | 1             | 0           | 1.686222                | 3.309154  | -2.449286 |
| 31            | 1             | 0           | 1.890189                | 1.310128  | 1.340366  |
| 32            | 1             | 0           | 1.972991                | 3.494516  | 2.489941  |
| 33            | 1             | 0           | 1.980742                | 5.782254  | 2.215167  |
| 34            | 1             | 0           | -0.247557               | -1.885001 | -1.445904 |
| 35            | 1             | 0           | 1.044208                | -1.437643 | -2.557489 |
| 36            | 1             | 0           | 0.502634                | -2.137105 | 1.124185  |
| 37            | 1             | 0           | 3.157247                | -2.446401 | -2.230967 |
| 38            | 1             | 0           | 4.740280                | -3.763308 | -0.859223 |

|    |   |   |           |           |           |
|----|---|---|-----------|-----------|-----------|
| 39 | 1 | 0 | 5.136020  | -4.679178 | 1.223076  |
| 40 | 1 | 0 | -0.618985 | 1.665814  | -1.483813 |
| 41 | 1 | 0 | -0.594612 | 0.488392  | -2.794109 |
| 42 | 1 | 0 | -1.668889 | 0.701524  | 0.821613  |
| 43 | 1 | 0 | -2.558862 | -0.758051 | -3.113914 |
| 44 | 1 | 0 | -4.741711 | -1.626106 | -2.294696 |
| 45 | 1 | 0 | -5.731085 | -1.235960 | 1.086455  |
| 46 | 1 | 0 | -3.027814 | 1.492631  | 2.591920  |
| 47 | 1 | 0 | -3.771060 | 0.402410  | 3.792202  |
| 48 | 1 | 0 | -2.253380 | -0.074597 | 2.985066  |
| 49 | 1 | 0 | 1.774921  | 5.500569  | -1.296870 |
| 50 | 1 | 0 | 2.087529  | -3.450006 | 2.497463  |

1. ArO-/X (-,1,1)

Sum of electronic and thermal Enthalpies= -1207.289832  
 Frequencies -- 17.5945 22.8240 26.3824

| Center<br>Number | Atomic<br>Number | Atomic<br>Type | Coordinates (Angstroms) |           |           |
|------------------|------------------|----------------|-------------------------|-----------|-----------|
|                  |                  |                | X                       | Y         | Z         |
| 1                | 7                | 0              | 0.507680                | 0.349673  | -1.008751 |
| 2                | 6                | 0              | 1.052485                | 1.704204  | -1.260098 |
| 3                | 6                | 0              | 0.318737                | 2.821256  | -0.554182 |
| 4                | 6                | 0              | -0.471955               | 3.743259  | -1.253478 |
| 5                | 6                | 0              | 0.419318                | 2.997282  | 0.835418  |
| 6                | 6                | 0              | -1.135230               | 4.785894  | -0.610472 |
| 7                | 6                | 0              | -0.236826               | 4.030406  | 1.494950  |
| 8                | 6                | 0              | -1.049174               | 4.975513  | 0.798857  |
| 9                | 8                | 0              | -1.665584               | 5.950709  | 1.413341  |
| 10               | 6                | 0              | 1.438622                | -0.685304 | -1.497230 |
| 11               | 6                | 0              | 2.700060                | -0.820195 | -0.670525 |
| 12               | 6                | 0              | 2.643516                | -1.273323 | 0.655000  |
| 13               | 6                | 0              | 3.956889                | -0.528538 | -1.207087 |
| 14               | 6                | 0              | 3.795123                | -1.424593 | 1.419974  |
| 15               | 6                | 0              | 5.124134                | -0.676627 | -0.455275 |
| 16               | 6                | 0              | 5.040106                | -1.124217 | 0.861997  |
| 17               | 8                | 0              | 6.148831                | -1.291949 | 1.658486  |
| 18               | 6                | 0              | -0.818449               | 0.193856  | -1.632883 |
| 19               | 6                | 0              | -1.580090               | -1.031718 | -1.172867 |
| 20               | 6                | 0              | -1.968117               | -1.155436 | 0.172056  |
| 21               | 6                | 0              | -1.937323               | -2.037634 | -2.069312 |
| 22               | 6                | 0              | -2.689104               | -2.263515 | 0.601442  |
| 23               | 6                | 0              | -2.666357               | -3.153596 | -1.645102 |
| 24               | 6                | 0              | -3.041557               | -3.271570 | -0.316728 |
| 25               | 8                | 0              | -3.755649               | -4.370287 | 0.094009  |
| 26               | 8                | 0              | -3.119016               | -2.488438 | 1.883166  |
| 27               | 6                | 0              | -2.809751               | -1.516436 | 2.891094  |
| 28               | 1                | 0              | 2.093597                | 1.688028  | -0.927566 |
| 29               | 1                | 0              | 1.072145                | 1.909739  | -2.345189 |
| 30               | 1                | 0              | -0.569163               | 3.644622  | -2.332427 |
| 31               | 1                | 0              | 1.031695                | 2.309607  | 1.414127  |
| 32               | 1                | 0              | -0.132595               | 4.140031  | 2.571573  |
| 33               | 1                | 0              | 0.902968                | -1.637794 | -1.476934 |

|    |   |   |           |           |           |
|----|---|---|-----------|-----------|-----------|
| 34 | 1 | 0 | 1.712830  | -0.499421 | -2.550158 |
| 35 | 1 | 0 | 1.683063  | -1.516138 | 1.097788  |
| 36 | 1 | 0 | 4.032945  | -0.178492 | -2.231896 |
| 37 | 1 | 0 | 6.092728  | -0.445061 | -0.887680 |
| 38 | 1 | 0 | 6.948614  | -1.057843 | 1.168321  |
| 39 | 1 | 0 | -1.397451 | 1.085244  | -1.379423 |
| 40 | 1 | 0 | -0.734865 | 0.172360  | -2.733357 |
| 41 | 1 | 0 | -1.703332 | -0.376634 | 0.875868  |
| 42 | 1 | 0 | -1.647856 | -1.958466 | -3.111881 |
| 43 | 1 | 0 | -2.943954 | -3.937475 | -2.341501 |
| 44 | 1 | 0 | -3.938800 | -4.289621 | 1.042066  |
| 45 | 1 | 0 | -3.259308 | -0.549176 | 2.650760  |
| 46 | 1 | 0 | -3.241459 | -1.901977 | 3.813575  |
| 47 | 1 | 0 | -1.728189 | -1.407512 | 3.008604  |
| 48 | 1 | 0 | -1.738119 | 5.483057  | -1.186910 |
| 49 | 1 | 0 | 3.741998  | -1.778683 | 2.443804  |

2. ARO-/X' (-1,1)

Sum of electronic and thermal Enthalpies= -1207.289710  
 Frequencies -- 12.1053 22.4971 24.2067

| Center<br>Number | Atomic<br>Number | Atomic<br>Type | Coordinates (Angstroms) |           |           |
|------------------|------------------|----------------|-------------------------|-----------|-----------|
|                  |                  |                | X                       | Y         | Z         |
| 1                | 7                | 0              | 0.548462                | -0.084669 | -1.056800 |
| 2                | 6                | 0              | 1.628864                | 0.851617  | -1.418401 |
| 3                | 6                | 0              | 1.512667                | 2.210636  | -0.761266 |
| 4                | 6                | 0              | 1.291196                | 3.367974  | -1.515213 |
| 5                | 6                | 0              | 1.652683                | 2.350858  | 0.625192  |
| 6                | 6                | 0              | 1.207860                | 4.624709  | -0.916576 |
| 7                | 6                | 0              | 1.569722                | 3.597220  | 1.240640  |
| 8                | 6                | 0              | 1.346213                | 4.737870  | 0.465829  |
| 9                | 8                | 0              | 1.256956                | 5.995079  | 1.017023  |
| 10               | 6                | 0              | 0.889697                | -1.467028 | -1.466373 |
| 11               | 6                | 0              | 2.019717                | -2.096898 | -0.684780 |
| 12               | 6                | 0              | 1.854214                | -2.482323 | 0.655385  |
| 13               | 6                | 0              | 3.269448                | -2.349866 | -1.266344 |
| 14               | 6                | 0              | 2.878348                | -3.081368 | 1.379790  |
| 15               | 6                | 0              | 4.306968                | -2.951444 | -0.557245 |
| 16               | 6                | 0              | 4.157374                | -3.345620 | 0.803522  |
| 17               | 8                | 0              | 5.120480                | -3.916560 | 1.478827  |
| 18               | 6                | 0              | -0.728475               | 0.336251  | -1.661834 |
| 19               | 6                | 0              | -1.946205               | -0.361355 | -1.091772 |
| 20               | 6                | 0              | -2.285684               | -0.190160 | 0.260906  |
| 21               | 6                | 0              | -2.768551               | -1.149310 | -1.895316 |
| 22               | 6                | 0              | -3.418093               | -0.799293 | 0.788642  |
| 23               | 6                | 0              | -3.912097               | -1.761898 | -1.372039 |
| 24               | 6                | 0              | -4.239624               | -1.591173 | -0.036787 |
| 25               | 8                | 0              | -5.364044               | -2.193387 | 0.471562  |
| 26               | 8                | 0              | -3.845655               | -0.701853 | 2.087181  |
| 27               | 6                | 0              | -3.071579               | 0.078143  | 3.008099  |
| 28               | 1                | 0              | 2.568910                | 0.389171  | -1.108589 |
| 29               | 1                | 0              | 1.684855                | 0.981718  | -2.513275 |

|    |   |   |           |           |           |
|----|---|---|-----------|-----------|-----------|
| 30 | 1 | 0 | 1.182333  | 3.290497  | -2.592625 |
| 31 | 1 | 0 | 1.834304  | 1.473686  | 1.237649  |
| 32 | 1 | 0 | 1.684557  | 3.690062  | 2.316308  |
| 33 | 1 | 0 | 1.375769  | 5.946572  | 1.975438  |
| 34 | 1 | 0 | -0.017397 | -2.062893 | -1.335728 |
| 35 | 1 | 0 | 1.131561  | -1.495087 | -2.543648 |
| 36 | 1 | 0 | 0.896347  | -2.313140 | 1.141783  |
| 37 | 1 | 0 | 3.434861  | -2.071458 | -2.304819 |
| 38 | 1 | 0 | 5.262076  | -3.133917 | -1.043349 |
| 39 | 1 | 0 | -0.829153 | 1.411332  | -1.491251 |
| 40 | 1 | 0 | -0.710578 | 0.190378  | -2.755716 |
| 41 | 1 | 0 | -1.657723 | 0.424121  | 0.893612  |
| 42 | 1 | 0 | -2.522140 | -1.292798 | -2.942041 |
| 43 | 1 | 0 | -4.552155 | -2.376168 | -1.996117 |
| 44 | 1 | 0 | -5.445854 | -1.964327 | 1.409607  |
| 45 | 1 | 0 | -3.027314 | 1.124048  | 2.692091  |
| 46 | 1 | 0 | -3.590473 | 0.006249  | 3.962848  |
| 47 | 1 | 0 | -2.060591 | -0.326247 | 3.107290  |
| 48 | 1 | 0 | 1.035957  | 5.514991  | -1.511669 |
| 49 | 1 | 0 | 2.713456  | -3.371841 | 2.414384  |

3. ARO-/Y (-1,1)

Sum of electronic and thermal Enthalpies= -1207.288916  
 Frequencies -- 14.2495 20.5819 21.5475

| Center Number | Atomic Number | Atomic Type | Coordinates (Angstroms) |           |           |
|---------------|---------------|-------------|-------------------------|-----------|-----------|
|               |               |             | X                       | Y         | Z         |
| 1             | 7             | 0           | 0.503290                | -0.202123 | -1.047105 |
| 2             | 6             | 0           | 1.923688                | 0.091784  | -1.312746 |
| 3             | 6             | 0           | 2.452440                | 1.304650  | -0.575879 |
| 4             | 6             | 0           | 2.902311                | 2.435745  | -1.264939 |
| 5             | 6             | 0           | 2.537694                | 1.314161  | 0.821987  |
| 6             | 6             | 0           | 3.419397                | 3.542504  | -0.592602 |
| 7             | 6             | 0           | 3.047967                | 2.411740  | 1.510733  |
| 8             | 6             | 0           | 3.490934                | 3.529432  | 0.799411  |
| 9             | 8             | 0           | 4.008406                | 4.640824  | 1.423290  |
| 10            | 6             | 0           | 0.154783                | -1.557767 | -1.510734 |
| 11            | 6             | 0           | 0.759098                | -2.668380 | -0.678274 |
| 12            | 6             | 0           | 0.373140                | -2.856027 | 0.656547  |
| 13            | 6             | 0           | 1.694217                | -3.555662 | -1.217842 |
| 14            | 6             | 0           | 0.903037                | -3.885524 | 1.427217  |
| 15            | 6             | 0           | 2.235011                | -4.596455 | -0.460337 |
| 16            | 6             | 0           | 1.838054                | -4.758464 | 0.865712  |
| 17            | 8             | 0           | 2.332333                | -5.761591 | 1.666700  |
| 18            | 6             | 0           | -0.369950               | 0.811782  | -1.681950 |
| 19            | 6             | 0           | -1.812574               | 0.772395  | -1.232111 |
| 20            | 6             | 0           | -2.161765               | 1.148133  | 0.081854  |
| 21            | 6             | 0           | -2.842021               | 0.395090  | -2.092062 |
| 22            | 6             | 0           | -3.481275               | 1.137174  | 0.510095  |
| 23            | 6             | 0           | -4.175387               | 0.383208  | -1.668461 |
| 24            | 6             | 0           | -4.562755               | 0.747258  | -0.357342 |
| 25            | 8             | 0           | -5.801903               | 0.743219  | 0.053941  |

|    |   |   |           |           |           |
|----|---|---|-----------|-----------|-----------|
| 26 | 8 | 0 | -3.877327 | 1.500986  | 1.783996  |
| 27 | 6 | 0 | -2.875679 | 1.912755  | 2.712585  |
| 28 | 1 | 0 | 2.499032  | -0.784119 | -1.002232 |
| 29 | 1 | 0 | 2.101835  | 0.219051  | -2.394710 |
| 30 | 1 | 0 | 2.850081  | 2.456293  | -2.349125 |
| 31 | 1 | 0 | 2.204317  | 0.449356  | 1.386284  |
| 32 | 1 | 0 | 3.110783  | 2.402355  | 2.594634  |
| 33 | 1 | 0 | 4.011817  | 4.512629  | 2.381634  |
| 34 | 1 | 0 | -0.934102 | -1.637997 | -1.469672 |
| 35 | 1 | 0 | 0.443531  | -1.697645 | -2.567026 |
| 36 | 1 | 0 | -0.358783 | -2.189730 | 1.101342  |
| 37 | 1 | 0 | 2.009920  | -3.437956 | -2.249854 |
| 38 | 1 | 0 | 2.960435  | -5.277298 | -0.895075 |
| 39 | 1 | 0 | 2.952100  | -6.309697 | 1.166373  |
| 40 | 1 | 0 | 0.059276  | 1.788099  | -1.441031 |
| 41 | 1 | 0 | -0.331080 | 0.713399  | -2.781145 |
| 42 | 1 | 0 | -1.375285 | 1.453199  | 0.762292  |
| 43 | 1 | 0 | -2.607510 | 0.105196  | -3.113227 |
| 44 | 1 | 0 | -4.961296 | 0.085810  | -2.358041 |
| 45 | 1 | 0 | -2.346102 | 2.804392  | 2.360577  |
| 46 | 1 | 0 | -3.404169 | 2.149539  | 3.636295  |
| 47 | 1 | 0 | -2.153781 | 1.111818  | 2.904038  |
| 48 | 1 | 0 | 3.764667  | 4.414338  | -1.137553 |
| 49 | 1 | 0 | 0.594966  | -4.025944 | 2.457661  |

4. ARO./X (0,2)

Sum of electronic and thermal Enthalpies= -1207.125445  
 Frequencies -- 14.8435 21.2317 24.6060

| Center<br>Number | Atomic<br>Number | Atomic<br>Type | Coordinates (Angstroms) |           |           |
|------------------|------------------|----------------|-------------------------|-----------|-----------|
|                  |                  |                | X                       | Y         | Z         |
| 1                | 7                | 0              | 0.550166                | 0.038835  | -1.045214 |
| 2                | 6                | 0              | 1.743392                | 0.838836  | -1.351085 |
| 3                | 6                | 0              | 1.793538                | 2.155420  | -0.619926 |
| 4                | 6                | 0              | 2.052722                | 3.356172  | -1.321991 |
| 5                | 6                | 0              | 1.627372                | 2.203819  | 0.788805  |
| 6                | 6                | 0              | 2.133841                | 4.559403  | -0.666304 |
| 7                | 6                | 0              | 1.704482                | 3.389806  | 1.469671  |
| 8                | 6                | 0              | 1.958306                | 4.632734  | 0.769305  |
| 9                | 8                | 0              | 2.027186                | 5.733472  | 1.384021  |
| 10               | 6                | 0              | 0.723105                | -1.356300 | -1.499161 |
| 11               | 6                | 0              | 1.735896                | -2.139456 | -0.692972 |
| 12               | 6                | 0              | 1.494491                | -2.452983 | 0.652184  |
| 13               | 6                | 0              | 2.925730                | -2.595087 | -1.267367 |
| 14               | 6                | 0              | 2.407626                | -3.188015 | 1.399854  |
| 15               | 6                | 0              | 3.852929                | -3.336324 | -0.532764 |
| 16               | 6                | 0              | 3.591751                | -3.630691 | 0.804432  |
| 17               | 8                | 0              | 4.460798                | -4.354240 | 1.585445  |
| 18               | 6                | 0              | -0.648501               | 0.651794  | -1.656181 |
| 19               | 6                | 0              | -1.958009               | 0.073727  | -1.165006 |
| 20               | 6                | 0              | -2.327702               | 0.208851  | 0.183943  |
| 21               | 6                | 0              | -2.831509               | -0.569550 | -2.040385 |

|    |   |   |           |           |           |
|----|---|---|-----------|-----------|-----------|
| 22 | 6 | 0 | -3.540520 | -0.295839 | 0.637989  |
| 23 | 6 | 0 | -4.055262 | -1.075787 | -1.591243 |
| 24 | 6 | 0 | -4.412444 | -0.943411 | -0.259094 |
| 25 | 8 | 0 | -5.614176 | -1.442252 | 0.175804  |
| 26 | 8 | 0 | -4.004801 | -0.222623 | 1.924659  |
| 27 | 6 | 0 | -3.188357 | 0.416793  | 2.914819  |
| 28 | 1 | 0 | 2.621167  | 0.258489  | -1.043666 |
| 29 | 1 | 0 | 1.845731  | 1.015313  | -2.434149 |
| 30 | 1 | 0 | 2.181374  | 3.315907  | -2.398666 |
| 31 | 1 | 0 | 1.442187  | 1.281167  | 1.326227  |
| 32 | 1 | 0 | 1.585151  | 3.433815  | 2.546806  |
| 33 | 1 | 0 | -0.251824 | -1.841694 | -1.413422 |
| 34 | 1 | 0 | 1.002151  | -1.387390 | -2.565632 |
| 35 | 1 | 0 | 0.574813  | -2.121437 | 1.123162  |
| 36 | 1 | 0 | 3.137318  | -2.371741 | -2.308426 |
| 37 | 1 | 0 | 4.772230  | -3.683971 | -0.993894 |
| 38 | 1 | 0 | 5.235348  | -4.614095 | 1.068319  |
| 39 | 1 | 0 | -0.620367 | 1.719007  | -1.417677 |
| 40 | 1 | 0 | -0.608755 | 0.571357  | -2.755096 |
| 41 | 1 | 0 | -1.661457 | 0.713473  | 0.871980  |
| 42 | 1 | 0 | -2.562614 | -0.681367 | -3.085357 |
| 43 | 1 | 0 | -4.735967 | -1.576898 | -2.270829 |
| 44 | 1 | 0 | -5.707790 | -1.257558 | 1.122536  |
| 45 | 1 | 0 | -3.017667 | 1.466442  | 2.660536  |
| 46 | 1 | 0 | -3.750348 | 0.352548  | 3.845362  |
| 47 | 1 | 0 | -2.232511 | -0.102423 | 3.025805  |
| 48 | 1 | 0 | 2.324833  | 5.484158  | -1.199765 |
| 49 | 1 | 0 | 2.211743  | -3.429721 | 2.438846  |

5. ARO./X' (0,2)

Sum of electronic and thermal Enthalpies= -1207.125489  
 Frequencies -- 17.8773 20.2611 23.7756

| Center<br>Number | Atomic<br>Number | Atomic<br>Type | Coordinates (Angstroms) |           |           |
|------------------|------------------|----------------|-------------------------|-----------|-----------|
|                  |                  |                | X                       | Y         | Z         |
| 1                | 7                | 0              | 0.612134                | -0.116872 | -1.050863 |
| 2                | 6                | 0              | 1.912015                | 0.528456  | -1.337851 |
| 3                | 6                | 0              | 2.106757                | 1.855268  | -0.637287 |
| 4                | 6                | 0              | 2.189648                | 3.051670  | -1.357714 |
| 5                | 6                | 0              | 2.236532                | 1.919250  | 0.755640  |
| 6                | 6                | 0              | 2.389070                | 4.274555  | -0.719285 |
| 7                | 6                | 0              | 2.434427                | 3.131936  | 1.410553  |
| 8                | 6                | 0              | 2.509180                | 4.313788  | 0.669212  |
| 9                | 8                | 0              | 2.704534                | 5.540330  | 1.258179  |
| 10               | 6                | 0              | 0.625091                | -1.515751 | -1.498356 |
| 11               | 6                | 0              | 1.475163                | -2.417860 | -0.641863 |
| 12               | 6                | 0              | 1.309575                | -2.439480 | 0.767575  |
| 13               | 6                | 0              | 2.416156                | -3.291776 | -1.235548 |
| 14               | 6                | 0              | 2.046871                | -3.284990 | 1.553304  |
| 15               | 6                | 0              | 3.170152                | -4.148766 | -0.472997 |
| 16               | 6                | 0              | 3.021094                | -4.183224 | 0.967001  |
| 17               | 8                | 0              | 3.709479                | -4.964817 | 1.680816  |

|    |   |   |           |           |           |
|----|---|---|-----------|-----------|-----------|
| 18 | 6 | 0 | -0.498525 | 0.625737  | -1.679830 |
| 19 | 6 | 0 | -1.869942 | 0.204051  | -1.198017 |
| 20 | 6 | 0 | -2.240301 | 0.413359  | 0.141312  |
| 21 | 6 | 0 | -2.795043 | -0.368321 | -2.069755 |
| 22 | 6 | 0 | -3.504443 | 0.050290  | 0.590092  |
| 23 | 6 | 0 | -4.070016 | -0.733385 | -1.625614 |
| 24 | 6 | 0 | -4.427617 | -0.529248 | -0.302697 |
| 25 | 8 | 0 | -5.679221 | -0.891511 | 0.126807  |
| 26 | 8 | 0 | -3.973793 | 0.208505  | 1.867114  |
| 27 | 6 | 0 | -3.099900 | 0.771073  | 2.854836  |
| 28 | 1 | 0 | 2.693360  | -0.162565 | -1.009913 |
| 29 | 1 | 0 | 2.045082  | 0.666155  | -2.423778 |
| 30 | 1 | 0 | 2.097160  | 3.031403  | -2.439130 |
| 31 | 1 | 0 | 2.188357  | 1.007999  | 1.342801  |
| 32 | 1 | 0 | 2.537720  | 3.165483  | 2.490838  |
| 33 | 1 | 0 | 2.774917  | 5.443872  | 2.217881  |
| 34 | 1 | 0 | -0.404299 | -1.890001 | -1.448239 |
| 35 | 1 | 0 | 0.940352  | -1.602558 | -2.550779 |
| 36 | 1 | 0 | 0.580705  | -1.776936 | 1.219280  |
| 37 | 1 | 0 | 2.541623  | -3.272370 | -2.313110 |
| 38 | 1 | 0 | 3.897919  | -4.815969 | -0.921777 |
| 39 | 1 | 0 | -0.348648 | 1.682385  | -1.445622 |
| 40 | 1 | 0 | -0.457106 | 0.533374  | -2.777908 |
| 41 | 1 | 0 | -1.532631 | 0.864282  | 0.825306  |
| 42 | 1 | 0 | -2.526855 | -0.534139 | -3.107718 |
| 43 | 1 | 0 | -4.790546 | -1.180163 | -2.302044 |
| 44 | 1 | 0 | -5.760989 | -0.685936 | 1.070294  |
| 45 | 1 | 0 | -2.806980 | 1.788612  | 2.582086  |
| 46 | 1 | 0 | -3.675211 | 0.791152  | 3.779211  |
| 47 | 1 | 0 | -2.211251 | 0.148015  | 2.987710  |
| 48 | 1 | 0 | 2.450761  | 5.196256  | -1.287396 |
| 49 | 1 | 0 | 1.919843  | -3.313047 | 2.630090  |

6. ARO./Y (0,2)

Sum of electronic and thermal Enthalpies= -1207.131942  
 Frequencies -- 14.2681 21.5845 22.1957

| Center<br>Number | Atomic<br>Number | Atomic<br>Type | Coordinates (Angstroms) |           |           |
|------------------|------------------|----------------|-------------------------|-----------|-----------|
|                  |                  |                | X                       | Y         | Z         |
| 1                | 7                | 0              | 0.519407                | 0.031448  | -1.059429 |
| 2                | 6                | 0              | 1.795775                | 0.740070  | -1.283464 |
| 3                | 6                | 0              | 1.916306                | 2.038811  | -0.516214 |
| 4                | 6                | 0              | 1.963382                | 3.271323  | -1.176352 |
| 5                | 6                | 0              | 2.011354                | 2.040208  | 0.881190  |
| 6                | 6                | 0              | 2.097834                | 4.468990  | -0.475698 |
| 7                | 6                | 0              | 2.144063                | 3.226683  | 1.597605  |
| 8                | 6                | 0              | 2.187236                | 4.445283  | 0.915299  |
| 9                | 8                | 0              | 2.322101                | 5.648376  | 1.566330  |
| 10               | 6                | 0              | 0.582633                | -1.354133 | -1.574406 |
| 11               | 6                | 0              | 1.498105                | -2.264035 | -0.784994 |
| 12               | 6                | 0              | 1.179603                | -2.644048 | 0.526291  |
| 13               | 6                | 0              | 2.673779                | -2.771664 | -1.344813 |



|    |   |   |           |           |           |
|----|---|---|-----------|-----------|-----------|
| 14 | 6 | 0 | 2.005843  | -3.491156 | 1.257084  |
| 15 | 6 | 0 | 3.513989  | -3.624388 | -0.627575 |
| 16 | 6 | 0 | 3.179096  | -3.980901 | 0.677971  |
| 17 | 8 | 0 | 3.963983  | -4.812931 | 1.440021  |
| 18 | 6 | 0 | -0.595316 | 0.753500  | -1.684864 |
| 19 | 6 | 0 | -1.960121 | 0.327478  | -1.198477 |
| 20 | 6 | 0 | -2.212955 | 0.182714  | 0.171437  |
| 21 | 6 | 0 | -3.010521 | 0.127863  | -2.135613 |
| 22 | 6 | 0 | -3.480770 | -0.155049 | 0.620895  |
| 23 | 6 | 0 | -4.272044 | -0.206250 | -1.723908 |
| 24 | 6 | 0 | -4.585949 | -0.368198 | -0.326370 |
| 25 | 8 | 0 | -5.737447 | -0.672420 | 0.078571  |
| 26 | 8 | 0 | -3.827952 | -0.311873 | 1.904421  |
| 27 | 6 | 0 | -2.837124 | -0.120234 | 2.932040  |
| 28 | 1 | 0 | 2.594973  | 0.066424  | -0.966453 |
| 29 | 1 | 0 | 1.951027  | 0.935100  | -2.357897 |
| 30 | 1 | 0 | 1.896414  | 3.300091  | -2.259474 |
| 31 | 1 | 0 | 1.987634  | 1.099779  | 1.422234  |
| 32 | 1 | 0 | 2.221720  | 3.212624  | 2.680537  |
| 33 | 1 | 0 | 2.382884  | 5.506699  | 2.520919  |
| 34 | 1 | 0 | -0.433849 | -1.755816 | -1.538893 |
| 35 | 1 | 0 | 0.889102  | -1.359209 | -2.633744 |
| 36 | 1 | 0 | 0.267799  | -2.276021 | 0.985070  |
| 37 | 1 | 0 | 2.943962  | -2.499731 | -2.360394 |
| 38 | 1 | 0 | 4.424240  | -4.009400 | -1.076732 |
| 39 | 1 | 0 | 4.747653  | -5.080963 | 0.940797  |
| 40 | 1 | 0 | -0.479506 | 1.817077  | -1.447292 |
| 41 | 1 | 0 | -0.560495 | 0.674275  | -2.783787 |
| 42 | 1 | 0 | -1.405587 | 0.343507  | 0.872346  |
| 43 | 1 | 0 | -2.795704 | 0.240860  | -3.192927 |
| 44 | 1 | 0 | -5.077353 | -0.365156 | -2.432674 |
| 45 | 1 | 0 | -2.454538 | 0.902578  | 2.907637  |
| 46 | 1 | 0 | -3.357171 | -0.301098 | 3.870544  |
| 47 | 1 | 0 | -2.020145 | -0.835285 | 2.813202  |
| 48 | 1 | 0 | 2.133898  | 5.418965  | -0.997641 |
| 49 | 1 | 0 | 1.750201  | -3.782107 | 2.270156  |

7. Radical Cation (1,2)

Sum of electronic and thermal Enthalpies= -1207.561799

Frequencies -- 16.1796 18.4564 22.8047

| Center<br>Number | Atomic<br>Number | Atomic<br>Type | Coordinates (Angstroms) |          |           |
|------------------|------------------|----------------|-------------------------|----------|-----------|
|                  |                  |                | X                       | Y        | Z         |
| 1                | 7                | 0              | 0.968613                | 0.163063 | -2.060656 |
| 2                | 6                | 0              | 1.459642                | 1.543527 | -1.987809 |
| 3                | 6                | 0              | 0.658033                | 2.419424 | -1.044415 |
| 4                | 6                | 0              | -0.243636               | 3.369343 | -1.536892 |
| 5                | 6                | 0              | 0.838416                | 2.317156 | 0.339905  |
| 6                | 6                | 0              | -0.948775               | 4.201647 | -0.673677 |
| 7                | 6                | 0              | 0.139892                | 3.143723 | 1.212949  |
| 8                | 6                | 0              | -0.757494               | 4.086887 | 0.705141  |
| 9                | 8                | 0              | -1.470769               | 4.926046 | 1.516331  |

|    |   |   |           |           |           |
|----|---|---|-----------|-----------|-----------|
| 10 | 6 | 0 | 1.894744  | -0.950238 | -1.830378 |
| 11 | 6 | 0 | 2.471758  | -0.975259 | -0.429193 |
| 12 | 6 | 0 | 1.696235  | -1.421651 | 0.649089  |
| 13 | 6 | 0 | 3.792058  | -0.583942 | -0.191540 |
| 14 | 6 | 0 | 2.224407  | -1.476862 | 1.932543  |
| 15 | 6 | 0 | 4.333550  | -0.634987 | 1.090399  |
| 16 | 6 | 0 | 3.545786  | -1.078519 | 2.154789  |
| 17 | 8 | 0 | 4.018324  | -1.149436 | 3.436638  |
| 18 | 6 | 0 | -0.350755 | -0.098658 | -2.645804 |
| 19 | 6 | 0 | -1.214661 | -1.041069 | -1.834179 |
| 20 | 6 | 0 | -1.838862 | -0.578654 | -0.663882 |
| 21 | 6 | 0 | -1.425381 | -2.351506 | -2.257399 |
| 22 | 6 | 0 | -2.665307 | -1.425570 | 0.063936  |
| 23 | 6 | 0 | -2.254714 | -3.204978 | -1.527360 |
| 24 | 6 | 0 | -2.872632 | -2.750278 | -0.372022 |
| 25 | 8 | 0 | -3.686934 | -3.589317 | 0.334214  |
| 26 | 8 | 0 | -3.335101 | -1.098753 | 1.208671  |
| 27 | 6 | 0 | -3.232289 | 0.242629  | 1.707928  |
| 28 | 1 | 0 | 2.508134  | 1.507280  | -1.698747 |
| 29 | 1 | 0 | 1.393344  | 1.937795  | -3.009284 |
| 30 | 1 | 0 | -0.387885 | 3.471820  | -2.607084 |
| 31 | 1 | 0 | 1.535548  | 1.591339  | 0.742960  |
| 32 | 1 | 0 | 0.289695  | 3.064662  | 2.284951  |
| 33 | 1 | 0 | -1.247438 | 4.766096  | 2.444136  |
| 34 | 1 | 0 | 1.365219  | -1.873295 | -2.058152 |
| 35 | 1 | 0 | 2.700835  | -0.822005 | -2.563748 |
| 36 | 1 | 0 | 0.670881  | -1.733436 | 0.484172  |
| 37 | 1 | 0 | 4.411818  | -0.245606 | -1.015043 |
| 38 | 1 | 0 | 5.362569  | -0.338672 | 1.267054  |
| 39 | 1 | 0 | 4.937996  | -0.850896 | 3.475502  |
| 40 | 1 | 0 | -0.841285 | 0.861317  | -2.796022 |
| 41 | 1 | 0 | -0.150135 | -0.538960 | -3.632039 |
| 42 | 1 | 0 | -1.678370 | 0.440008  | -0.335595 |
| 43 | 1 | 0 | -0.954725 | -2.711540 | -3.165206 |
| 44 | 1 | 0 | -2.432623 | -4.223571 | -1.853226 |
| 45 | 1 | 0 | -4.048059 | -3.111849 | 1.097297  |
| 46 | 1 | 0 | -3.609360 | 0.958992  | 0.973147  |
| 47 | 1 | 0 | -3.853524 | 0.271191  | 2.601617  |
| 48 | 1 | 0 | -2.198323 | 0.481203  | 1.970243  |
| 49 | 1 | 0 | -1.639621 | 4.943773  | -1.057425 |
| 50 | 1 | 0 | 1.626380  | -1.828130 | 2.765803  |

### S1.1 - Compound 1

ArOH (0,1)

Sum of electronic and thermal Enthalpies= -1436.797915

Frequencies -- 5.7179 13.1450 15.3962

| Center<br>Number | Atomic<br>Number | Atomic<br>Type | Coordinates (Angstroms) |           |           |
|------------------|------------------|----------------|-------------------------|-----------|-----------|
|                  |                  |                | X                       | Y         | Z         |
| 1                | 7                | 0              | 0.070748                | -0.231942 | -1.154552 |
| 2                | 6                | 0              | 0.998717                | -1.374148 | -1.267721 |
| 3                | 6                | 0              | 2.141832                | -1.338749 | -0.274057 |

|    |   |   |           |           |           |
|----|---|---|-----------|-----------|-----------|
| 4  | 6 | 0 | 3.462353  | -1.176091 | -0.717093 |
| 5  | 6 | 0 | 1.905553  | -1.491072 | 1.094161  |
| 6  | 6 | 0 | 4.520296  | -1.159378 | 0.189610  |
| 7  | 6 | 0 | 2.960014  | -1.474052 | 2.007829  |
| 8  | 6 | 0 | 4.264605  | -1.306985 | 1.563095  |
| 9  | 8 | 0 | 5.844163  | -1.003422 | -0.130715 |
| 10 | 8 | 0 | 5.293353  | -1.290117 | 2.472332  |
| 11 | 6 | 0 | -1.171957 | -0.490663 | -1.908075 |
| 12 | 6 | 0 | -2.059833 | -1.549048 | -1.288031 |
| 13 | 6 | 0 | -2.666402 | -1.313751 | -0.042590 |
| 14 | 6 | 0 | -2.313898 | -2.753671 | -1.941531 |
| 15 | 6 | 0 | -3.498456 | -2.267984 | 0.530950  |
| 16 | 6 | 0 | -3.152213 | -3.717563 | -1.371687 |
| 17 | 6 | 0 | -3.742087 | -3.482098 | -0.140247 |
| 18 | 8 | 0 | -4.561359 | -4.433804 | 0.414226  |
| 19 | 6 | 0 | 0.712327  | 1.014433  | -1.615802 |
| 20 | 6 | 0 | -0.034200 | 2.272989  | -1.225946 |
| 21 | 6 | 0 | -0.160969 | 2.621516  | 0.129574  |
| 22 | 6 | 0 | -0.578833 | 3.118574  | -2.190764 |
| 23 | 6 | 0 | -0.823756 | 3.785159  | 0.501142  |
| 24 | 6 | 0 | -1.244469 | 4.293130  | -1.824159 |
| 25 | 6 | 0 | -1.370627 | 4.628256  | -0.485829 |
| 26 | 8 | 0 | -2.025516 | 5.780789  | -0.129700 |
| 27 | 8 | 0 | -1.007046 | 4.226396  | 1.785615  |
| 28 | 6 | 0 | -0.483986 | 3.439483  | 2.864005  |
| 29 | 6 | 0 | 6.203431  | -0.830423 | -1.507922 |
| 30 | 8 | 0 | -4.142586 | -2.146242 | 1.734320  |
| 31 | 6 | 0 | -3.950709 | -0.947675 | 2.497499  |
| 32 | 1 | 0 | 0.413770  | -2.281021 | -1.097254 |
| 33 | 1 | 0 | 1.405593  | -1.446757 | -2.290692 |
| 34 | 1 | 0 | 3.655629  | -1.061585 | -1.776568 |
| 35 | 1 | 0 | 0.892500  | -1.628118 | 1.456150  |
| 36 | 1 | 0 | 2.780736  | -1.595162 | 3.070785  |
| 37 | 1 | 0 | 6.129574  | -1.162485 | 1.999627  |
| 38 | 1 | 0 | -1.723510 | 0.451785  | -1.951067 |
| 39 | 1 | 0 | -0.945706 | -0.773909 | -2.950084 |
| 40 | 1 | 0 | -2.483095 | -0.377872 | 0.469974  |
| 41 | 1 | 0 | -1.856601 | -2.951100 | -2.905276 |
| 42 | 1 | 0 | -3.349521 | -4.656216 | -1.878096 |
| 43 | 1 | 0 | -4.888141 | -4.110671 | 1.267370  |
| 44 | 1 | 0 | 1.710400  | 1.046091  | -1.171938 |
| 45 | 1 | 0 | 0.851905  | 1.001695  | -2.710090 |
| 46 | 1 | 0 | 0.265764  | 1.975586  | 0.886400  |
| 47 | 1 | 0 | -0.487900 | 2.866258  | -3.241959 |
| 48 | 1 | 0 | -1.669949 | 4.951629  | -2.573666 |
| 49 | 1 | 0 | -2.017574 | 5.858760  | 0.836310  |
| 50 | 1 | 0 | 0.603437  | 3.351474  | 2.790135  |
| 51 | 1 | 0 | -0.746853 | 3.976231  | 3.774374  |
| 52 | 1 | 0 | -0.939723 | 2.445695  | 2.877972  |
| 53 | 1 | 0 | 5.741132  | 0.070179  | -1.921438 |
| 54 | 1 | 0 | 7.287063  | -0.722937 | -1.517914 |
| 55 | 1 | 0 | 5.915576  | -1.704504 | -2.098634 |
| 56 | 1 | 0 | -4.305173 | -0.073085 | 1.945016  |
| 57 | 1 | 0 | -4.545058 | -1.075871 | 3.400972  |

58 1 0 -2.897979 -0.820417 2.764356

1. ArO-/X (-1,1)

Sum of electronic and thermal Enthalpies= -1436.331646

Frequencies -- 12.8675 14.4297 19.1362

Center Atomic Atomic Coordinates (Angstroms)  
Number Number Type X Y Z

|    |   |   |           |           |           |
|----|---|---|-----------|-----------|-----------|
| 1  | 7 | 0 | 0.067769  | -0.232548 | -1.133589 |
| 2  | 6 | 0 | 0.916835  | -1.440327 | -1.256682 |
| 3  | 6 | 0 | 2.062714  | -1.505265 | -0.271477 |
| 4  | 6 | 0 | 3.395351  | -1.341281 | -0.695838 |
| 5  | 6 | 0 | 1.840333  | -1.747667 | 1.085239  |
| 6  | 6 | 0 | 4.456844  | -1.408539 | 0.199899  |
| 7  | 6 | 0 | 2.900468  | -1.814487 | 1.990523  |
| 8  | 6 | 0 | 4.252836  | -1.646847 | 1.601185  |
| 9  | 8 | 0 | 5.782539  | -1.251516 | -0.166114 |
| 10 | 8 | 0 | 5.249629  | -1.705078 | 2.443194  |
| 11 | 6 | 0 | -1.184176 | -0.393622 | -1.893927 |
| 12 | 6 | 0 | -2.147512 | -1.399091 | -1.296875 |
| 13 | 6 | 0 | -2.654096 | -1.206486 | -0.000484 |
| 14 | 6 | 0 | -2.577428 | -2.505264 | -2.027760 |
| 15 | 6 | 0 | -3.563086 | -2.105769 | 0.544579  |
| 16 | 6 | 0 | -3.496563 | -3.411104 | -1.487818 |
| 17 | 6 | 0 | -3.989688 | -3.217165 | -0.207848 |
| 18 | 8 | 0 | -4.891274 | -4.109833 | 0.317822  |
| 19 | 6 | 0 | 0.797720  | 0.969668  | -1.575604 |
| 20 | 6 | 0 | 0.135109  | 2.274871  | -1.186808 |
| 21 | 6 | 0 | 0.032107  | 2.633365  | 0.168194  |
| 22 | 6 | 0 | -0.355878 | 3.152262  | -2.152326 |
| 23 | 6 | 0 | -0.554667 | 3.837666  | 0.538749  |
| 24 | 6 | 0 | -0.945810 | 4.366843  | -1.786952 |
| 25 | 6 | 0 | -1.049003 | 4.711488  | -0.449082 |
| 26 | 8 | 0 | -1.631017 | 5.903786  | -0.095690 |
| 27 | 8 | 0 | -0.706932 | 4.291894  | 1.823017  |
| 28 | 6 | 0 | -0.222877 | 3.479359  | 2.900909  |
| 29 | 6 | 0 | 6.081654  | -1.013429 | -1.540266 |
| 30 | 8 | 0 | -4.120299 | -2.020617 | 1.793977  |
| 31 | 6 | 0 | -3.740742 | -0.928714 | 2.642295  |
| 32 | 1 | 0 | 0.259550  | -2.299761 | -1.102267 |
| 33 | 1 | 0 | 1.309824  | -1.525870 | -2.285148 |
| 34 | 1 | 0 | 3.586221  | -1.158997 | -1.747309 |
| 35 | 1 | 0 | 0.825154  | -1.890253 | 1.446230  |
| 36 | 1 | 0 | 2.705281  | -2.007371 | 3.042401  |
| 37 | 1 | 0 | -1.672393 | 0.584261  | -1.924485 |
| 38 | 1 | 0 | -0.976486 | -0.674981 | -2.940823 |
| 39 | 1 | 0 | -2.330560 | -0.348597 | 0.574774  |
| 40 | 1 | 0 | -2.195745 | -2.670571 | -3.029734 |
| 41 | 1 | 0 | -3.830728 | -4.273082 | -2.055089 |
| 42 | 1 | 0 | -5.130843 | -3.823401 | 1.212068  |
| 43 | 1 | 0 | 1.789027  | 0.927191  | -1.118212 |
| 44 | 1 | 0 | 0.950975  | 0.955987  | -2.668700 |

|    |   |   |           |           |           |
|----|---|---|-----------|-----------|-----------|
| 45 | 1 | 0 | 0.418819  | 1.962903  | 0.925242  |
| 46 | 1 | 0 | -0.281909 | 2.893503  | -3.203317 |
| 47 | 1 | 0 | -1.330045 | 5.049703  | -2.536982 |
| 48 | 1 | 0 | -1.613485 | 5.986122  | 0.869653  |
| 49 | 1 | 0 | 0.856585  | 3.325884  | 2.818733  |
| 50 | 1 | 0 | -0.445868 | 4.034505  | 3.810904  |
| 51 | 1 | 0 | -0.737236 | 2.514796  | 2.923105  |
| 52 | 1 | 0 | 5.624243  | -0.083492 | -1.894689 |
| 53 | 1 | 0 | 7.166735  | -0.925055 | -1.599273 |
| 54 | 1 | 0 | 5.752517  | -1.845457 | -2.171993 |
| 55 | 1 | 0 | -4.020342 | 0.028608  | 2.193832  |
| 56 | 1 | 0 | -4.291111 | -1.072722 | 3.570933  |
| 57 | 1 | 0 | -2.666387 | -0.947879 | 2.844679  |

2. ARO-/X' (-,1)

Sum of electronic and thermal Enthalpies= -1436.331014  
 Frequencies -- 14.1292 14.6398 18.6175

| Center<br>Number | Atomic<br>Number | Atomic<br>Type | Coordinates (Angstroms) |           |           |
|------------------|------------------|----------------|-------------------------|-----------|-----------|
|                  |                  |                | X                       | Y         | Z         |
| 1                | 7                | 0              | 0.173041                | -0.074295 | -0.696633 |
| 2                | 6                | 0              | 0.374655                | 1.384890  | -0.754030 |
| 3                | 6                | 0              | -0.673981               | 2.184579  | -0.007587 |
| 4                | 6                | 0              | -1.512011               | 3.070777  | -0.699745 |
| 5                | 6                | 0              | -0.808749               | 2.077338  | 1.378642  |
| 6                | 6                | 0              | -2.464863               | 3.827328  | -0.020912 |
| 7                | 6                | 0              | -1.764704               | 2.828204  | 2.064172  |
| 8                | 6                | 0              | -2.594198               | 3.700186  | 1.371887  |
| 9                | 8                | 0              | -3.331225               | 4.721215  | -0.596150 |
| 10               | 8                | 0              | -3.532122               | 4.433264  | 2.057140  |
| 11               | 6                | 0              | 1.367030                | -0.790472 | -1.203814 |
| 12               | 6                | 0              | 2.599439                | -0.670181 | -0.335454 |
| 13               | 6                | 0              | 3.694786                | 0.116155  | -0.741852 |
| 14               | 6                | 0              | 2.707188                | -1.351514 | 0.878140  |
| 15               | 6                | 0              | 4.842925                | 0.219127  | 0.034407  |
| 16               | 6                | 0              | 3.857710                | -1.253093 | 1.663553  |
| 17               | 6                | 0              | 4.978105                | -0.471300 | 1.286995  |
| 18               | 8                | 0              | 6.063595                | -0.378235 | 2.007554  |
| 19               | 6                | 0              | -1.026284               | -0.466441 | -1.460417 |
| 20               | 6                | 0              | -1.496855               | -1.880789 | -1.190749 |
| 21               | 6                | 0              | -1.951651               | -2.236673 | 0.090202  |
| 22               | 6                | 0              | -1.520783               | -2.840129 | -2.201581 |
| 23               | 6                | 0              | -2.410387               | -3.523454 | 0.346286  |
| 24               | 6                | 0              | -1.981798               | -4.136935 | -1.951453 |
| 25               | 6                | 0              | -2.423311               | -4.482902 | -0.684603 |
| 26               | 8                | 0              | -2.873705               | -5.757741 | -0.444704 |
| 27               | 8                | 0              | -2.879585               | -3.978889 | 1.550859  |
| 28               | 6                | 0              | -2.908503               | -3.073688 | 2.662559  |
| 29               | 6                | 0              | -3.276973               | 4.913357  | -2.015707 |
| 30               | 8                | 0              | 5.943811                | 0.978324  | -0.321701 |
| 31               | 6                | 0              | 5.899536                | 1.700158  | -1.550977 |
| 32               | 1                | 0              | 1.353151                | 1.588876  | -0.313236 |

|    |   |   |           |           |           |
|----|---|---|-----------|-----------|-----------|
| 33 | 1 | 0 | 0.419075  | 1.733641  | -1.800663 |
| 34 | 1 | 0 | -1.413987 | 3.163545  | -1.774273 |
| 35 | 1 | 0 | -0.163645 | 1.406128  | 1.934666  |
| 36 | 1 | 0 | -1.870846 | 2.748310  | 3.140775  |
| 37 | 1 | 0 | -4.021045 | 4.983548  | 1.426905  |
| 38 | 1 | 0 | 1.086179  | -1.843332 | -1.285840 |
| 39 | 1 | 0 | 1.605559  | -0.448096 | -2.226524 |
| 40 | 1 | 0 | 3.631243  | 0.647020  | -1.684869 |
| 41 | 1 | 0 | 1.885111  | -1.975738 | 1.218697  |
| 42 | 1 | 0 | 3.922241  | -1.797654 | 2.602195  |
| 43 | 1 | 0 | -1.825936 | 0.226538  | -1.186818 |
| 44 | 1 | 0 | -0.857806 | -0.343978 | -2.544360 |
| 45 | 1 | 0 | -1.944959 | -1.497953 | 0.881498  |
| 46 | 1 | 0 | -1.175207 | -2.582937 | -3.197267 |
| 47 | 1 | 0 | -1.997243 | -4.885527 | -2.736254 |
| 48 | 1 | 0 | -3.123312 | -5.832297 | 0.488731  |
| 49 | 1 | 0 | -3.560734 | -2.221159 | 2.453717  |
| 50 | 1 | 0 | -3.309863 | -3.646035 | 3.497604  |
| 51 | 1 | 0 | -1.901679 | -2.723754 | 2.906252  |
| 52 | 1 | 0 | -3.500044 | 3.982341  | -2.544209 |
| 53 | 1 | 0 | -4.042210 | 5.654544  | -2.241604 |
| 54 | 1 | 0 | -2.297637 | 5.291940  | -2.321247 |
| 55 | 1 | 0 | 5.085855  | 2.433296  | -1.555968 |
| 56 | 1 | 0 | 6.853975  | 2.221789  | -1.625967 |
| 57 | 1 | 0 | 5.788384  | 1.026338  | -2.407276 |

3. ARO-/Y (-1,1)

Sum of electronic and thermal Enthalpies= -1436.331082  
 Frequencies -- 13.9669 18.9189 22.3496

| Center<br>Number | Atomic<br>Number | Atomic<br>Type | Coordinates (Angstroms) |           |           |
|------------------|------------------|----------------|-------------------------|-----------|-----------|
|                  |                  |                | X                       | Y         | Z         |
| 1                | 7                | 0              | -0.112158               | 0.072624  | -0.674110 |
| 2                | 6                | 0              | -0.170904               | -1.396416 | -0.789524 |
| 3                | 6                | 0              | 0.929596                | -2.123830 | -0.043667 |
| 4                | 6                | 0              | 1.869627                | -2.892202 | -0.745303 |
| 5                | 6                | 0              | 1.010488                | -2.071579 | 1.349722  |
| 6                | 6                | 0              | 2.868340                | -3.588799 | -0.068428 |
| 7                | 6                | 0              | 2.011054                | -2.763324 | 2.033958  |
| 8                | 6                | 0              | 2.940087                | -3.520346 | 1.332856  |
| 9                | 8                | 0              | 3.833439                | -4.367695 | -0.653241 |
| 10               | 8                | 0              | 3.917896                | -4.199118 | 2.017906  |
| 11               | 6                | 0              | -1.357594               | 0.681739  | -1.177770 |
| 12               | 6                | 0              | -2.572359               | 0.417342  | -0.311898 |
| 13               | 6                | 0              | -3.634982               | -0.356559 | -0.800590 |
| 14               | 6                | 0              | -2.670230               | 0.957055  | 0.972802  |
| 15               | 6                | 0              | -4.765534               | -0.588317 | -0.020029 |
| 16               | 6                | 0              | -3.798421               | 0.726402  | 1.761238  |
| 17               | 6                | 0              | -4.845160               | -0.043744 | 1.272384  |
| 18               | 8                | 0              | -5.950917               | -0.262248 | 2.057485  |
| 19               | 6                | 0              | 1.062284                | 0.606539  | -1.402230 |
| 20               | 6                | 0              | 1.355915                | 2.066826  | -1.145918 |

|    |   |   |           |           |           |
|----|---|---|-----------|-----------|-----------|
| 21 | 6 | 0 | 1.809299  | 2.496604  | 0.118749  |
| 22 | 6 | 0 | 1.215690  | 3.028636  | -2.144312 |
| 23 | 6 | 0 | 2.097376  | 3.831041  | 0.367894  |
| 24 | 6 | 0 | 1.508139  | 4.374896  | -1.902656 |
| 25 | 6 | 0 | 1.955617  | 4.844316  | -0.645381 |
| 26 | 8 | 0 | 2.225932  | 6.097964  | -0.402305 |
| 27 | 8 | 0 | 2.543611  | 4.306173  | 1.587504  |
| 28 | 6 | 0 | 2.718153  | 3.374434  | 2.653921  |
| 29 | 6 | 0 | 3.841874  | -4.494152 | -2.081226 |
| 30 | 8 | 0 | -5.857078 | -1.327416 | -0.397644 |
| 31 | 6 | 0 | -5.866372 | -1.921071 | -1.702213 |
| 32 | 1 | 0 | -1.135230 | -1.714528 | -0.385629 |
| 33 | 1 | 0 | -0.154400 | -1.704911 | -1.849437 |
| 34 | 1 | 0 | 1.814632  | -2.939734 | -1.825807 |
| 35 | 1 | 0 | 0.288223  | -1.490387 | 1.912358  |
| 36 | 1 | 0 | 2.075645  | -2.726421 | 3.116171  |
| 37 | 1 | 0 | 4.481583  | -4.664021 | 1.381579  |
| 38 | 1 | 0 | -1.187233 | 1.759552  | -1.227462 |
| 39 | 1 | 0 | -1.566776 | 0.345453  | -2.208290 |
| 40 | 1 | 0 | -3.570772 | -0.776149 | -1.796954 |
| 41 | 1 | 0 | -1.864427 | 1.567038  | 1.366128  |
| 42 | 1 | 0 | -3.878654 | 1.146477  | 2.758117  |
| 43 | 1 | 0 | -6.576447 | -0.820405 | 1.571512  |
| 44 | 1 | 0 | 1.920208  | 0.002478  | -1.095024 |
| 45 | 1 | 0 | 0.939311  | 0.449990  | -2.488615 |
| 46 | 1 | 0 | 1.932020  | 1.761227  | 0.905392  |
| 47 | 1 | 0 | 0.872656  | 2.729186  | -3.131436 |
| 48 | 1 | 0 | 1.390727  | 5.107134  | -2.697362 |
| 49 | 1 | 0 | 3.468407  | 2.616613  | 2.404403  |
| 50 | 1 | 0 | 3.066324  | 3.957937  | 3.506509  |
| 51 | 1 | 0 | 1.775050  | 2.882098  | 2.913550  |
| 52 | 1 | 0 | 3.989447  | -3.521323 | -2.558298 |
| 53 | 1 | 0 | 4.682203  | -5.146642 | -2.313836 |
| 54 | 1 | 0 | 2.913818  | -4.949429 | -2.438136 |
| 55 | 1 | 0 | -5.040776 | -2.629357 | -1.814527 |
| 56 | 1 | 0 | -6.815217 | -2.450155 | -1.778151 |
| 57 | 1 | 0 | -5.810156 | -1.154305 | -2.479902 |

4. ARO./X (0,2)

Sum of electronic and thermal Enthalpies= -1436.175360  
 Frequencies -- 12.9129 15.1788 18.8073

| Center<br>Number | Atomic<br>Number | Atomic<br>Type | Coordinates (Angstroms) |           |           |
|------------------|------------------|----------------|-------------------------|-----------|-----------|
|                  |                  |                | X                       | Y         | Z         |
| 1                | 7                | 0              | -0.128431               | -0.124257 | 1.150899  |
| 2                | 6                | 0              | -1.243382               | -1.071908 | 1.286846  |
| 3                | 6                | 0              | -2.343773               | -0.855046 | 0.277400  |
| 4                | 6                | 0              | -3.667840               | -0.709369 | 0.697555  |
| 5                | 6                | 0              | -2.037679               | -0.847565 | -1.114408 |
| 6                | 6                | 0              | -4.691510               | -0.552979 | -0.231677 |
| 7                | 6                | 0              | -3.020410               | -0.696446 | -2.051321 |
| 8                | 6                | 0              | -4.403344               | -0.539194 | -1.672957 |

|    |   |   |           |           |           |
|----|---|---|-----------|-----------|-----------|
| 9  | 8 | 0 | -5.985925 | -0.399941 | 0.067263  |
| 10 | 8 | 0 | -5.325677 | -0.400267 | -2.517488 |
| 11 | 6 | 0 | 1.060895  | -0.601571 | 1.884618  |
| 12 | 6 | 0 | 1.707804  | -1.827213 | 1.276365  |
| 13 | 6 | 0 | 2.291817  | -1.754742 | 0.000154  |
| 14 | 6 | 0 | 1.761855  | -3.033251 | 1.973238  |
| 15 | 6 | 0 | 2.906266  | -2.868568 | -0.559815 |
| 16 | 6 | 0 | 2.382077  | -4.156903 | 1.417385  |
| 17 | 6 | 0 | 2.951571  | -4.080599 | 0.156784  |
| 18 | 8 | 0 | 3.558405  | -5.185890 | -0.384040 |
| 19 | 6 | 0 | -0.532959 | 1.220113  | 1.613981  |
| 20 | 6 | 0 | 0.436376  | 2.319483  | 1.236271  |
| 21 | 6 | 0 | 0.625676  | 2.656872  | -0.114516 |
| 22 | 6 | 0 | 1.135421  | 3.029619  | 2.210886  |
| 23 | 6 | 0 | 1.501867  | 3.674574  | -0.472969 |
| 24 | 6 | 0 | 2.016977  | 4.056180  | 1.857760  |
| 25 | 6 | 0 | 2.205554  | 4.379035  | 0.523539  |
| 26 | 8 | 0 | 3.075267  | 5.384736  | 0.184129  |
| 27 | 8 | 0 | 1.763359  | 4.089035  | -1.752292 |
| 28 | 6 | 0 | 1.082533  | 3.443014  | -2.836285 |
| 29 | 6 | 0 | -6.399805 | -0.394097 | 1.447188  |
| 30 | 8 | 0 | 3.506703  | -2.916494 | -1.790283 |
| 31 | 6 | 0 | 3.522519  | -1.729025 | -2.593916 |
| 32 | 1 | 0 | -0.842360 | -2.078881 | 1.128479  |
| 33 | 1 | 0 | -1.666233 | -1.055196 | 2.304366  |
| 34 | 1 | 0 | -3.886706 | -0.715138 | 1.757802  |
| 35 | 1 | 0 | -1.006316 | -0.971936 | -1.422633 |
| 36 | 1 | 0 | -2.797999 | -0.698155 | -3.112865 |
| 37 | 1 | 0 | 1.783671  | 0.217841  | 1.887730  |
| 38 | 1 | 0 | 0.811446  | -0.810453 | 2.938287  |
| 39 | 1 | 0 | 2.262541  | -0.820584 | -0.546211 |
| 40 | 1 | 0 | 1.318621  | -3.106018 | 2.960667  |
| 41 | 1 | 0 | 2.424815  | -5.096254 | 1.957833  |
| 42 | 1 | 0 | 3.899053  | -4.959360 | -1.262533 |
| 43 | 1 | 0 | -1.506372 | 1.435837  | 1.164976  |
| 44 | 1 | 0 | -0.678508 | 1.226631  | 2.707056  |
| 45 | 1 | 0 | 0.079598  | 2.119372  | -0.879292 |
| 46 | 1 | 0 | 0.998784  | 2.784363  | 3.258775  |
| 47 | 1 | 0 | 2.564014  | 4.607870  | 2.614564  |
| 48 | 1 | 0 | 3.094827  | 5.473273  | -0.780736 |
| 49 | 1 | 0 | 0.000494  | 3.575352  | -2.750214 |
| 50 | 1 | 0 | 1.440448  | 3.931762  | -3.741215 |
| 51 | 1 | 0 | 1.327993  | 2.378129  | -2.871650 |
| 52 | 1 | 0 | -5.932212 | 0.435166  | 1.982452  |
| 53 | 1 | 0 | -7.479209 | -0.259781 | 1.422814  |
| 54 | 1 | 0 | -6.151748 | -1.344729 | 1.924505  |
| 55 | 1 | 0 | 4.063669  | -0.924352 | -2.088681 |
| 56 | 1 | 0 | 4.043374  | -2.001209 | -3.510744 |
| 57 | 1 | 0 | 2.505225  | -1.405660 | -2.830775 |

5. ARO./X' (0,2)

Sum of electronic and thermal Enthalpies= -1436.174753  
 Frequencies -- 16.4305 17.5647 18.5957



| Center<br>Number | Atomic<br>Number | Atomic<br>Type | Coordinates (Angstroms) |           |           |
|------------------|------------------|----------------|-------------------------|-----------|-----------|
|                  |                  |                | X                       | Y         | Z         |
| 1                | 7                | 0              | 0.020226                | -0.228384 | -1.125481 |
| 2                | 6                | 0              | 1.008071                | -1.320259 | -1.262844 |
| 3                | 6                | 0              | 2.174304                | -1.221143 | -0.302058 |
| 4                | 6                | 0              | 3.471283                | -0.996073 | -0.785931 |
| 5                | 6                | 0              | 1.986223                | -1.375017 | 1.073297  |
| 6                | 6                | 0              | 4.553213                | -0.919638 | 0.088278  |
| 7                | 6                | 0              | 3.064930                | -1.296687 | 1.954836  |
| 8                | 6                | 0              | 4.345612                | -1.067514 | 1.470155  |
| 9                | 8                | 0              | 5.857298                | -0.702730 | -0.272729 |
| 10               | 8                | 0              | 5.398066                | -0.991444 | 2.347792  |
| 11               | 6                | 0              | -1.201073               | -0.551204 | -1.876012 |
| 12               | 6                | 0              | -2.035922               | -1.644453 | -1.252563 |
| 13               | 6                | 0              | -2.390820               | -1.580307 | 0.101246  |
| 14               | 6                | 0              | -2.507155               | -2.717994 | -2.056288 |
| 15               | 6                | 0              | -3.197340               | -2.558254 | 0.663899  |
| 16               | 6                | 0              | -3.302975               | -3.699397 | -1.530591 |
| 17               | 6                | 0              | -3.694520               | -3.683330 | -0.143589 |
| 18               | 8                | 0              | -4.421891               | -4.574813 | 0.364815  |
| 19               | 6                | 0              | 0.586515                | 1.058759  | -1.576657 |
| 20               | 6                | 0              | -0.244247               | 2.263310  | -1.189593 |
| 21               | 6                | 0              | -0.389196               | 2.609159  | 0.164775  |
| 22               | 6                | 0              | -0.853152               | 3.061671  | -2.156476 |
| 23               | 6                | 0              | -1.131723               | 3.724373  | 0.533598  |
| 24               | 6                | 0              | -1.599216               | 4.187537  | -1.792579 |
| 25               | 6                | 0              | -1.741946               | 4.520917  | -0.455383 |
| 26               | 8                | 0              | -2.473977               | 5.626653  | -0.102901 |
| 27               | 8                | 0              | -1.339716               | 4.157946  | 1.816426  |
| 28               | 6                | 0              | -0.747437               | 3.422255  | 2.895233  |
| 29               | 6                | 0              | 6.165981                | -0.524493 | -1.661536 |
| 30               | 8                | 0              | -3.600631               | -2.585995 | 1.940295  |
| 31               | 6                | 0              | -3.186900               | -1.534333 | 2.832887  |
| 32               | 1                | 0              | 0.477017                | -2.258064 | -1.077771 |
| 33               | 1                | 0              | 1.389237                | -1.369946 | -2.296402 |
| 34               | 1                | 0              | 3.626461                | -0.879861 | -1.851392 |
| 35               | 1                | 0              | 0.993057                | -1.561003 | 1.466796  |
| 36               | 1                | 0              | 2.923459                | -1.417555 | 3.023459  |
| 37               | 1                | 0              | 6.210449                | -0.812117 | 1.850818  |
| 38               | 1                | 0              | -1.815607               | 0.354970  | -1.914960 |
| 39               | 1                | 0              | -0.971978               | -0.820497 | -2.919983 |
| 40               | 1                | 0              | -2.030292               | -0.754273 | 0.698824  |
| 41               | 1                | 0              | -2.220764               | -2.752089 | -3.101979 |
| 42               | 1                | 0              | -3.661645               | -4.524955 | -2.135478 |
| 43               | 1                | 0              | 1.575441                | 1.149892  | -1.121468 |
| 44               | 1                | 0              | 0.736884                | 1.058052  | -2.669132 |
| 45               | 1                | 0              | 0.087132                | 2.000507  | 0.922883  |
| 46               | 1                | 0              | -0.748409               | 2.811032  | -3.206761 |
| 47               | 1                | 0              | -2.073721               | 4.810007  | -2.543400 |
| 48               | 1                | 0              | -2.463582               | 5.715538  | 0.862210  |
| 49               | 1                | 0              | 0.342667                | 3.416542  | 2.810179  |
| 50               | 1                | 0              | -1.041038               | 3.945453  | 3.804063  |

|    |   |   |           |           |           |
|----|---|---|-----------|-----------|-----------|
| 51 | 1 | 0 | -1.126480 | 2.397029  | 2.922016  |
| 52 | 1 | 0 | 5.648234  | 0.349400  | -2.066671 |
| 53 | 1 | 0 | 7.242323  | -0.364954 | -1.705381 |
| 54 | 1 | 0 | 5.902940  | -1.416380 | -2.236898 |
| 55 | 1 | 0 | -3.555809 | -0.568169 | 2.481475  |
| 56 | 1 | 0 | -3.637179 | -1.777785 | 3.793089  |
| 57 | 1 | 0 | -2.098631 | -1.516335 | 2.924021  |

6. ARO./Y (0,2)

Sum of electronic and thermal Enthalpies= -1436.174553  
 Frequencies -- 13.9687 16.4574 17.4446

| Center<br>Number | Atomic<br>Number | Atomic<br>Type | Coordinates (Angstroms) |           |           |
|------------------|------------------|----------------|-------------------------|-----------|-----------|
|                  |                  |                | X                       | Y         | Z         |
| 1                | 7                | 0              | 0.083532                | -0.124765 | -1.099930 |
| 2                | 6                | 0              | 0.977859                | -1.293894 | -1.217033 |
| 3                | 6                | 0              | 2.118971                | -1.295002 | -0.221243 |
| 4                | 6                | 0              | 3.445422                | -1.197212 | -0.665875 |
| 5                | 6                | 0              | 1.875895                | -1.422315 | 1.148440  |
| 6                | 6                | 0              | 4.503314                | -1.224017 | 0.240372  |
| 7                | 6                | 0              | 2.930588                | -1.447318 | 2.061562  |
| 8                | 6                | 0              | 4.241685                | -1.348825 | 1.615089  |
| 9                | 8                | 0              | 5.832380                | -1.136113 | -0.082238 |
| 10               | 8                | 0              | 5.270625                | -1.378785 | 2.523158  |
| 11               | 6                | 0              | -1.153766               | -0.324461 | -1.884258 |
| 12               | 6                | 0              | -2.064982               | -1.404804 | -1.342461 |
| 13               | 6                | 0              | -2.659111               | -1.259720 | -0.077322 |
| 14               | 6                | 0              | -2.355230               | -2.541882 | -2.094782 |
| 15               | 6                | 0              | -3.514705               | -2.236820 | 0.418026  |
| 16               | 6                | 0              | -3.219829               | -3.525961 | -1.605315 |
| 17               | 6                | 0              | -3.798721               | -3.379705 | -0.354981 |
| 18               | 8                | 0              | -4.646146               | -4.348838 | 0.119587  |
| 19               | 6                | 0              | 0.767404                | 1.099697  | -1.536502 |
| 20               | 6                | 0              | 0.072065                | 2.376375  | -1.127496 |
| 21               | 6                | 0              | -0.343392               | 2.565773  | 0.196830  |
| 22               | 6                | 0              | -0.113133               | 3.414060  | -2.081340 |
| 23               | 6                | 0              | -0.937786               | 3.757597  | 0.583678  |
| 24               | 6                | 0              | -0.696313               | 4.601448  | -1.730999 |
| 25               | 6                | 0              | -1.144737               | 4.846915  | -0.383268 |
| 26               | 8                | 0              | -1.683189               | 5.929232  | -0.035443 |
| 27               | 8                | 0              | -1.363659               | 4.042011  | 1.820745  |
| 28               | 6                | 0              | -1.199000               | 3.064688  | 2.865666  |
| 29               | 6                | 0              | 6.198153                | -1.021467 | -1.463816 |
| 30               | 8                | 0              | -4.147480               | -2.204056 | 1.632662  |
| 31               | 6                | 0              | -3.935043               | -1.073414 | 2.488262  |
| 32               | 1                | 0              | 0.364137                | -2.182440 | -1.052295 |
| 33               | 1                | 0              | 1.384339                | -1.373365 | -2.239187 |
| 34               | 1                | 0              | 3.643776                | -1.100754 | -1.726200 |
| 35               | 1                | 0              | 0.857900                | -1.509601 | 1.511771  |
| 36               | 1                | 0              | 2.746441                | -1.551434 | 3.125458  |
| 37               | 1                | 0              | 6.112778                | -1.319567 | 2.047373  |
| 38               | 1                | 0              | -1.691607               | 0.628045  | -1.882380 |

|    |   |   |           |           |           |
|----|---|---|-----------|-----------|-----------|
| 39 | 1 | 0 | -0.913578 | -0.551206 | -2.936344 |
| 40 | 1 | 0 | -2.447929 | -0.377024 | 0.512538  |
| 41 | 1 | 0 | -1.906440 | -2.669297 | -3.074134 |
| 42 | 1 | 0 | -3.447268 | -4.410978 | -2.189578 |
| 43 | 1 | 0 | -4.968788 | -4.084692 | 0.994409  |
| 44 | 1 | 0 | 1.763468  | 1.105140  | -1.080141 |
| 45 | 1 | 0 | 0.922583  | 1.105988  | -2.627804 |
| 46 | 1 | 0 | -0.188946 | 1.771043  | 0.913543  |
| 47 | 1 | 0 | 0.213270  | 3.249008  | -3.102654 |
| 48 | 1 | 0 | -0.845884 | 5.396030  | -2.453733 |
| 49 | 1 | 0 | -0.140154 | 2.843716  | 3.017751  |
| 50 | 1 | 0 | -1.615666 | 3.525384  | 3.759017  |
| 51 | 1 | 0 | -1.747762 | 2.151401  | 2.625514  |
| 52 | 1 | 0 | 5.784390  | -0.109303 | -1.902514 |
| 53 | 1 | 0 | 7.285989  | -0.972697 | -1.476967 |
| 54 | 1 | 0 | 5.862481  | -1.895104 | -2.029371 |
| 55 | 1 | 0 | -4.280655 | -0.152870 | 2.009826  |
| 56 | 1 | 0 | -4.526192 | -1.265982 | 3.382341  |
| 57 | 1 | 0 | -2.879315 | -0.982103 | 2.758087  |

7. Radical Cation (1,2)

Sum of electronic and thermal Enthalpies= -1436.605877

Frequencies -- -2.4227 14.1753 19.4915

1 negative frequency found – ignored since value is too small, likely due to numerical noise.

| Center<br>Number | Atomic<br>Number | Atomic<br>Type | Coordinates (Angstroms) |           |           |
|------------------|------------------|----------------|-------------------------|-----------|-----------|
|                  |                  |                | X                       | Y         | Z         |
| 1                | 7                | 0              | -0.278772               | -0.118647 | -1.956316 |
| 2                | 6                | 0              | -0.154501               | -1.567273 | -1.778045 |
| 3                | 6                | 0              | 0.780806                | -1.953218 | -0.650330 |
| 4                | 6                | 0              | 2.031830                | -2.516254 | -0.938192 |
| 5                | 6                | 0              | 0.392612                | -1.772820 | 0.678425  |
| 6                | 6                | 0              | 2.881535                | -2.897028 | 0.096101  |
| 7                | 6                | 0              | 1.240560                | -2.154605 | 1.716943  |
| 8                | 6                | 0              | 2.481744                | -2.709322 | 1.434933  |
| 9                | 8                | 0              | 3.304346                | -3.071974 | 2.462510  |
| 10               | 6                | 0              | -1.608362               | 0.478039  | -2.094282 |
| 11               | 6                | 0              | -2.460594               | 0.317544  | -0.851155 |
| 12               | 6                | 0              | -2.182252               | 1.067266  | 0.293255  |
| 13               | 6                | 0              | -3.546483               | -0.568533 | -0.854619 |
| 14               | 6                | 0              | -2.982123               | 0.942122  | 1.428020  |
| 15               | 6                | 0              | -4.346498               | -0.695765 | 0.276809  |
| 16               | 6                | 0              | -4.057324               | 0.063799  | 1.428441  |
| 17               | 8                | 0              | -4.832049               | -0.051792 | 2.546218  |
| 18               | 6                | 0              | 0.906106                | 0.668332  | -2.317040 |
| 19               | 6                | 0              | 1.088718                | 1.935103  | -1.505802 |
| 20               | 6                | 0              | 1.579737                | 1.855725  | -0.192549 |
| 21               | 6                | 0              | 0.810845                | 3.181208  | -2.063244 |
| 22               | 6                | 0              | 1.787067                | 3.014932  | 0.544709  |
| 23               | 6                | 0              | 1.017466                | 4.348301  | -1.324631 |
| 24               | 6                | 0              | 1.500718                | 4.271527  | -0.027119 |
| 25               | 8                | 0              | 1.701794                | 5.418008  | 0.688483  |

|    |   |   |           |           |           |
|----|---|---|-----------|-----------|-----------|
| 26 | 8 | 0 | 2.264718  | 3.074177  | 1.823350  |
| 27 | 6 | 0 | 2.637977  | 1.853212  | 2.478081  |
| 28 | 1 | 0 | -1.153402 | -1.970317 | -1.618437 |
| 29 | 1 | 0 | 0.222884  | -1.959271 | -2.731278 |
| 30 | 1 | 0 | 2.328075  | -2.663787 | -1.968870 |
| 31 | 1 | 0 | -0.572619 | -1.337854 | 0.909556  |
| 32 | 1 | 0 | 0.947542  | -2.024918 | 2.752719  |
| 33 | 1 | 0 | 4.128431  | -3.433497 | 2.101731  |
| 34 | 1 | 0 | -1.477811 | 1.527894  | -2.351306 |
| 35 | 1 | 0 | -2.084111 | -0.026918 | -2.944167 |
| 36 | 1 | 0 | -1.345341 | 1.755178  | 0.302676  |
| 37 | 1 | 0 | -3.767874 | -1.142336 | -1.745009 |
| 38 | 1 | 0 | -5.528545 | -0.707450 | 2.385094  |
| 39 | 1 | 0 | 1.772975  | 0.015629  | -2.231514 |
| 40 | 1 | 0 | 0.774816  | 0.927135  | -3.376304 |
| 41 | 1 | 0 | 1.798452  | 0.888666  | 0.241221  |
| 42 | 1 | 0 | 0.442950  | 3.252283  | -3.080613 |
| 43 | 1 | 0 | 0.811530  | 5.322934  | -1.752490 |
| 44 | 1 | 0 | 2.057309  | 5.189483  | 1.561442  |
| 45 | 1 | 0 | 3.436935  | 1.348323  | 1.928833  |
| 46 | 1 | 0 | 2.997591  | 2.147058  | 3.462934  |
| 47 | 1 | 0 | 1.776013  | 1.189557  | 2.583216  |
| 48 | 1 | 0 | -2.779013 | 1.522847  | 2.320554  |
| 49 | 8 | 0 | -5.435007 | -1.509167 | 0.394690  |
| 50 | 8 | 0 | 4.114021  | -3.462895 | -0.053259 |
| 51 | 6 | 0 | -5.800649 | -2.339574 | -0.717816 |
| 52 | 1 | 0 | -4.993066 | -3.033945 | -0.964445 |
| 53 | 1 | 0 | -6.677994 | -2.895810 | -0.392431 |
| 54 | 1 | 0 | -6.053000 | -1.730281 | -1.589305 |
| 55 | 6 | 0 | 4.613840  | -3.693347 | -1.378931 |
| 56 | 1 | 0 | 4.704545  | -2.752458 | -1.928233 |
| 57 | 1 | 0 | 5.598763  | -4.138047 | -1.247141 |
| 58 | 1 | 0 | 3.966144  | -4.386678 | -1.921926 |

### S1.2- Compound 2

ArOH (0,1)

Sum of electronic and thermal Enthalpies= -1665.835855

Frequencies -- 12.0448 12.8955 15.9333

| Center Number | Atomic Number | Atomic Type | Coordinates (Angstroms) |           |           |
|---------------|---------------|-------------|-------------------------|-----------|-----------|
|               |               |             | X                       | Y         | Z         |
| 1             | 7             | 0           | -0.015894               | 0.118745  | -1.175795 |
| 2             | 6             | 0           | 0.294519                | -1.314705 | -1.337053 |
| 3             | 6             | 0           | 1.520078                | -1.772184 | -0.572050 |
| 4             | 6             | 0           | 2.631128                | -2.268180 | -1.258190 |
| 5             | 6             | 0           | 1.531579                | -1.726622 | 0.826699  |
| 6             | 6             | 0           | 3.757450                | -2.715427 | -0.559114 |
| 7             | 6             | 0           | 2.654048                | -2.169129 | 1.523692  |
| 8             | 6             | 0           | 3.771444                | -2.663767 | 0.837511  |
| 9             | 8             | 0           | 4.891709                | -3.215368 | -1.140704 |
| 10            | 8             | 0           | 4.883335                | -3.103564 | 1.511192  |
| 11            | 6             | 0           | -1.365582               | 0.420039  | -1.689658 |

|    |   |   |           |           |           |
|----|---|---|-----------|-----------|-----------|
| 12 | 6 | 0 | -2.490896 | -0.165594 | -0.860339 |
| 13 | 6 | 0 | -2.680531 | 0.253014  | 0.461787  |
| 14 | 6 | 0 | -3.362999 | -1.100639 | -1.423096 |
| 15 | 6 | 0 | -3.730747 | -0.263664 | 1.222447  |
| 16 | 6 | 0 | -4.416198 | -1.614689 | -0.663711 |
| 17 | 6 | 0 | -4.603689 | -1.203152 | 0.658702  |
| 18 | 8 | 0 | -5.632717 | -1.698654 | 1.419769  |
| 19 | 6 | 0 | 0.997111  | 0.950805  | -1.854548 |
| 20 | 6 | 0 | 0.937785  | 2.419443  | -1.490762 |
| 21 | 6 | 0 | 1.233471  | 2.831605  | -0.180229 |
| 22 | 6 | 0 | 0.623317  | 3.386631  | -2.443964 |
| 23 | 6 | 0 | 1.206698  | 4.178970  | 0.160342  |
| 24 | 6 | 0 | 0.597724  | 4.744350  | -2.109214 |
| 25 | 6 | 0 | 0.886428  | 5.143842  | -0.814379 |
| 26 | 8 | 0 | 0.861315  | 6.477671  | -0.491982 |
| 27 | 8 | 0 | 1.478441  | 4.695408  | 1.400225  |
| 28 | 6 | 0 | 1.851949  | 3.794686  | 2.451287  |
| 29 | 6 | 0 | 4.945216  | -3.291383 | -2.571022 |
| 30 | 8 | 0 | -4.003704 | 0.079889  | 2.518939  |
| 31 | 6 | 0 | -3.166878 | 1.054808  | 3.153585  |
| 32 | 1 | 0 | -0.573164 | -1.873805 | -0.978233 |
| 33 | 1 | 0 | 0.418312  | -1.569629 | -2.403231 |
| 34 | 1 | 0 | 2.614523  | -2.302644 | -2.339451 |
| 35 | 1 | 0 | 0.668435  | -1.352251 | 1.360721  |
| 36 | 1 | 0 | 4.722914  | -3.009537 | 2.462362  |
| 37 | 1 | 0 | -1.468815 | 1.507889  | -1.704206 |
| 38 | 1 | 0 | -1.471008 | 0.077406  | -2.733041 |
| 39 | 1 | 0 | -2.008438 | 0.984353  | 0.890050  |
| 40 | 1 | 0 | -3.217301 | -1.423690 | -2.445644 |
| 41 | 1 | 0 | -6.141134 | -2.319201 | 0.875812  |
| 42 | 1 | 0 | 1.976742  | 0.556865  | -1.572901 |
| 43 | 1 | 0 | 0.915905  | 0.847506  | -2.950062 |
| 44 | 1 | 0 | 1.487910  | 2.089886  | 0.566177  |
| 45 | 1 | 0 | 0.395256  | 3.086811  | -3.461277 |
| 46 | 1 | 0 | 0.353963  | 5.498155  | -2.849963 |
| 47 | 1 | 0 | 1.101611  | 6.579586  | 0.441242  |
| 48 | 1 | 0 | 2.767093  | 3.254367  | 2.193839  |
| 49 | 1 | 0 | 2.028912  | 4.419508  | 3.325487  |
| 50 | 1 | 0 | 1.045945  | 3.086728  | 2.662522  |
| 51 | 1 | 0 | 4.857073  | -2.298759 | -3.021743 |
| 52 | 1 | 0 | 5.922662  | -3.711593 | -2.804500 |
| 53 | 1 | 0 | 4.162723  | -3.949095 | -2.960011 |
| 54 | 1 | 0 | -3.210771 | 2.012723  | 2.627726  |
| 55 | 1 | 0 | -3.567197 | 1.172908  | 4.159704  |
| 56 | 1 | 0 | -2.131421 | 0.707791  | 3.210886  |
| 57 | 8 | 0 | 2.790937  | -2.179749 | 2.887662  |
| 58 | 6 | 0 | 1.697758  | -1.716361 | 3.691492  |
| 59 | 1 | 0 | 0.806867  | -2.328697 | 3.527963  |
| 60 | 1 | 0 | 2.028346  | -1.819214 | 4.724029  |
| 61 | 1 | 0 | 1.475196  | -0.667109 | 3.479828  |
| 62 | 8 | 0 | -5.336219 | -2.533368 | -1.099192 |
| 63 | 6 | 0 | -5.249565 | -3.003495 | -2.451088 |
| 64 | 1 | 0 | -4.302657 | -3.522113 | -2.624192 |
| 65 | 1 | 0 | -6.076097 | -3.702195 | -2.572334 |

66 1 0 -5.359613 -2.177504 -3.159020

1. ArO-/X (-1,1)

Sum of electronic and thermal Enthalpies= -1665.370367

Frequencies -- 12.9174 13.4091 16.2326

Center Atomic Atomic Coordinates (Angstroms)  
Number Number Type X Y Z

|    |   |   |           |           |           |
|----|---|---|-----------|-----------|-----------|
| 1  | 7 | 0 | -0.042009 | 0.119139  | -1.146482 |
| 2  | 6 | 0 | 0.249213  | -1.318950 | -1.288314 |
| 3  | 6 | 0 | 1.472714  | -1.781427 | -0.522922 |
| 4  | 6 | 0 | 2.574037  | -2.303037 | -1.205989 |
| 5  | 6 | 0 | 1.491979  | -1.714052 | 0.874905  |
| 6  | 6 | 0 | 3.697929  | -2.753830 | -0.505096 |
| 7  | 6 | 0 | 2.611855  | -2.160178 | 1.573536  |
| 8  | 6 | 0 | 3.719444  | -2.680072 | 0.890274  |
| 9  | 8 | 0 | 4.823327  | -3.277562 | -1.083891 |
| 10 | 8 | 0 | 4.828832  | -3.123470 | 1.566780  |
| 11 | 6 | 0 | -1.395826 | 0.434224  | -1.658278 |
| 12 | 6 | 0 | -2.531766 | -0.150802 | -0.848967 |
| 13 | 6 | 0 | -2.815788 | 0.327241  | 0.437788  |
| 14 | 6 | 0 | -3.338234 | -1.164961 | -1.377667 |
| 15 | 6 | 0 | -3.872769 | -0.202901 | 1.175174  |
| 16 | 6 | 0 | -4.397911 | -1.692070 | -0.638637 |
| 17 | 6 | 0 | -4.718930 | -1.239440 | 0.673990  |
| 18 | 8 | 0 | -5.712451 | -1.732701 | 1.363362  |
| 19 | 6 | 0 | 0.976825  | 0.925125  | -1.845598 |
| 20 | 6 | 0 | 0.945466  | 2.400566  | -1.504827 |
| 21 | 6 | 0 | 1.245832  | 2.827627  | -0.200171 |
| 22 | 6 | 0 | 0.655443  | 3.359105  | -2.474422 |
| 23 | 6 | 0 | 1.246735  | 4.180608  | 0.118648  |
| 24 | 6 | 0 | 0.657208  | 4.722302  | -2.161463 |
| 25 | 6 | 0 | 0.949405  | 5.136314  | -0.872016 |
| 26 | 8 | 0 | 0.950377  | 6.475650  | -0.570390 |
| 27 | 8 | 0 | 1.526509  | 4.711001  | 1.351096  |
| 28 | 6 | 0 | 1.869537  | 3.818676  | 2.419538  |
| 29 | 6 | 0 | 4.865608  | -3.385158 | -2.512304 |
| 30 | 8 | 0 | -4.205061 | 0.223872  | 2.450249  |
| 31 | 6 | 0 | -3.428716 | 1.266283  | 3.037953  |
| 32 | 1 | 0 | -0.624308 | -1.859640 | -0.916569 |
| 33 | 1 | 0 | 0.364441  | -1.592627 | -2.351360 |
| 34 | 1 | 0 | 2.551620  | -2.354652 | -2.286502 |
| 35 | 1 | 0 | 0.636177  | -1.320128 | 1.406630  |
| 36 | 1 | 0 | 4.671365  | -3.013993 | 2.516834  |
| 37 | 1 | 0 | -1.479518 | 1.524068  | -1.667229 |
| 38 | 1 | 0 | -1.491516 | 0.102271  | -2.707103 |
| 39 | 1 | 0 | -2.203635 | 1.118302  | 0.853451  |
| 40 | 1 | 0 | -3.128467 | -1.537991 | -2.372893 |
| 41 | 1 | 0 | 1.954030  | 0.521605  | -1.568149 |
| 42 | 1 | 0 | 0.884281  | 0.807544  | -2.939232 |
| 43 | 1 | 0 | 1.480735  | 2.092593  | 0.559121  |
| 44 | 1 | 0 | 0.423407  | 3.047984  | -3.487453 |

|    |   |   |           |           |           |
|----|---|---|-----------|-----------|-----------|
| 45 | 1 | 0 | 0.430760  | 5.468937  | -2.914909 |
| 46 | 1 | 0 | 1.177851  | 6.585910  | 0.365053  |
| 47 | 1 | 0 | 2.773446  | 3.252445  | 2.178504  |
| 48 | 1 | 0 | 2.054630  | 4.453158  | 3.285073  |
| 49 | 1 | 0 | 1.045065  | 3.133774  | 2.635275  |
| 50 | 1 | 0 | 4.788030  | -2.401536 | -2.984268 |
| 51 | 1 | 0 | 5.835425  | -3.824001 | -2.743447 |
| 52 | 1 | 0 | 4.071280  | -4.040044 | -2.881624 |
| 53 | 1 | 0 | -3.487649 | 2.189330  | 2.451604  |
| 54 | 1 | 0 | -3.859819 | 1.439388  | 4.024355  |
| 55 | 1 | 0 | -2.379966 | 0.971585  | 3.149338  |
| 56 | 8 | 0 | 2.755250  | -2.151205 | 2.936986  |
| 57 | 6 | 0 | 1.669849  | -1.664817 | 3.738147  |
| 58 | 1 | 0 | 0.771692  | -2.269240 | 3.585695  |
| 59 | 1 | 0 | 2.002848  | -1.757360 | 4.770897  |
| 60 | 1 | 0 | 1.458135  | -0.616159 | 3.512938  |
| 61 | 8 | 0 | -5.229693 | -2.696834 | -1.105862 |
| 62 | 6 | 0 | -4.983633 | -3.227657 | -2.406513 |
| 63 | 1 | 0 | -3.989308 | -3.681961 | -2.473007 |
| 64 | 1 | 0 | -5.740579 | -3.996714 | -2.562821 |
| 65 | 1 | 0 | -5.086135 | -2.459145 | -3.180075 |

2. ARO-/X' (-1,1)

Sum of electronic and thermal Enthalpies= -1665.370330  
 Frequencies -- 14.0196 16.3835 17.8828

| Center Number | Atomic Number | Atomic Type | Coordinates (Angstroms) |           |           |
|---------------|---------------|-------------|-------------------------|-----------|-----------|
|               |               |             | X                       | Y         | Z         |
| 1             | 7             | 0           | 0.022478                | 0.115459  | -1.164727 |
| 2             | 6             | 0           | 0.305823                | -1.328034 | -1.339827 |
| 3             | 6             | 0           | 1.511560                | -1.831677 | -0.578151 |
| 4             | 6             | 0           | 2.674266                | -2.225378 | -1.250275 |
| 5             | 6             | 0           | 1.479695                | -1.934061 | 0.819510  |
| 6             | 6             | 0           | 3.780065                | -2.701552 | -0.544325 |
| 7             | 6             | 0           | 2.585056                | -2.408510 | 1.522186  |
| 8             | 6             | 0           | 3.793188                | -2.814640 | 0.876351  |
| 9             | 8             | 0           | 4.958361                | -3.105465 | -1.152161 |
| 10            | 8             | 0           | 4.826763                | -3.260242 | 1.538873  |
| 11            | 6             | 0           | -1.308834               | 0.452128  | -1.700257 |
| 12            | 6             | 0           | -2.464216               | -0.103787 | -0.891169 |
| 13            | 6             | 0           | -2.649785               | 0.299590  | 0.436193  |
| 14            | 6             | 0           | -3.369226               | -0.991557 | -1.477980 |
| 15            | 6             | 0           | -3.728351               | -0.185048 | 1.177858  |
| 16            | 6             | 0           | -4.450568               | -1.473910 | -0.737374 |
| 17            | 6             | 0           | -4.634716               | -1.076727 | 0.589821  |
| 18            | 8             | 0           | -5.691196               | -1.541317 | 1.333277  |
| 19            | 6             | 0           | 1.064449                | 0.935551  | -1.810222 |
| 20            | 6             | 0           | 1.031423                | 2.398588  | -1.421157 |
| 21            | 6             | 0           | 1.320003                | 2.780292  | -0.099813 |
| 22            | 6             | 0           | 0.746901                | 3.389809  | -2.359105 |
| 23            | 6             | 0           | 1.315182                | 4.121283  | 0.266063  |
| 24            | 6             | 0           | 0.742891                | 4.741352  | -1.998658 |

|    |   |   |           |           |           |
|----|---|---|-----------|-----------|-----------|
| 25 | 6 | 0 | 1.023672  | 5.110320  | -0.693142 |
| 26 | 8 | 0 | 1.018870  | 6.438310  | -0.344400 |
| 27 | 8 | 0 | 1.582776  | 4.609575  | 1.518425  |
| 28 | 6 | 0 | 1.929081  | 3.682893  | 2.556527  |
| 29 | 6 | 0 | 5.045206  | -3.030628 | -2.573757 |
| 30 | 8 | 0 | -3.998936 | 0.147343  | 2.478000  |
| 31 | 6 | 0 | -3.116464 | 1.059566  | 3.143371  |
| 32 | 1 | 0 | -0.585274 | -1.863350 | -1.001992 |
| 33 | 1 | 0 | 0.428112  | -1.563806 | -2.411633 |
| 34 | 1 | 0 | 2.705805  | -2.155542 | -2.330875 |
| 35 | 1 | 0 | 0.581159  | -1.641678 | 1.349088  |
| 36 | 1 | 0 | -1.385714 | 1.542440  | -1.715333 |
| 37 | 1 | 0 | -1.406984 | 0.114203  | -2.746378 |
| 38 | 1 | 0 | -1.950758 | 0.992810  | 0.884078  |
| 39 | 1 | 0 | -3.226300 | -1.304274 | -2.504143 |
| 40 | 1 | 0 | -6.217598 | -2.134065 | 0.775836  |
| 41 | 1 | 0 | 2.028712  | 0.513580  | -1.517422 |
| 42 | 1 | 0 | 1.001828  | 0.854216  | -2.909347 |
| 43 | 1 | 0 | 1.551835  | 2.019282  | 0.634556  |
| 44 | 1 | 0 | 0.525424  | 3.113666  | -3.384596 |
| 45 | 1 | 0 | 0.522057  | 5.513718  | -2.727442 |
| 46 | 1 | 0 | 1.248670  | 6.516758  | 0.593772  |
| 47 | 1 | 0 | 2.837386  | 3.131383  | 2.298936  |
| 48 | 1 | 0 | 2.107158  | 4.288318  | 3.444073  |
| 49 | 1 | 0 | 1.108853  | 2.985213  | 2.745894  |
| 50 | 1 | 0 | 4.931514  | -2.000969 | -2.929216 |
| 51 | 1 | 0 | 6.041580  | -3.390860 | -2.831285 |
| 52 | 1 | 0 | 4.296214  | -3.667828 | -3.055868 |
| 53 | 1 | 0 | -3.105083 | 2.031823  | 2.642661  |
| 54 | 1 | 0 | -3.517886 | 1.172902  | 4.149617  |
| 55 | 1 | 0 | -2.101406 | 0.656522  | 3.198065  |
| 56 | 8 | 0 | 2.616960  | -2.537245 | 2.900616  |
| 57 | 6 | 0 | 1.452604  | -2.175229 | 3.641111  |
| 58 | 1 | 0 | 0.591124  | -2.789732 | 3.359086  |
| 59 | 1 | 0 | 1.696465  | -2.357543 | 4.688041  |
| 60 | 1 | 0 | 1.204923  | -1.116951 | 3.507528  |
| 61 | 8 | 0 | -5.402642 | -2.347544 | -1.197042 |
| 62 | 6 | 0 | -5.315478 | -2.806533 | -2.552605 |
| 63 | 1 | 0 | -4.386669 | -3.358899 | -2.719056 |
| 64 | 1 | 0 | -6.166261 | -3.471869 | -2.692450 |
| 65 | 1 | 0 | -5.384440 | -1.969590 | -3.252847 |

3. ARO-/Y (-1,1)

Sum of electronic and thermal Enthalpies= -1665.370126  
 Frequencies -- 11.1034 14.9466 15.3738

| Center<br>Number | Atomic<br>Number | Atomic<br>Type | Coordinates (Angstroms) |           |           |
|------------------|------------------|----------------|-------------------------|-----------|-----------|
|                  |                  |                | X                       | Y         | Z         |
| 1                | 7                | 0              | -0.002734               | 0.160169  | -1.119049 |
| 2                | 6                | 0              | 0.388268                | -1.247910 | -1.313790 |
| 3                | 6                | 0              | 1.644697                | -1.656217 | -0.570720 |
| 4                | 6                | 0              | 2.762947                | -2.102951 | -1.278683 |



|    |   |   |           |           |           |
|----|---|---|-----------|-----------|-----------|
| 5  | 6 | 0 | 1.678054  | -1.621380 | 0.827901  |
| 6  | 6 | 0 | 3.916240  | -2.513637 | -0.601906 |
| 7  | 6 | 0 | 2.828070  | -2.026299 | 1.502704  |
| 8  | 6 | 0 | 3.951429  | -2.474150 | 0.794663  |
| 9  | 8 | 0 | 5.058185  | -2.966149 | -1.207360 |
| 10 | 8 | 0 | 5.090087  | -2.879005 | 1.446192  |
| 11 | 6 | 0 | -1.363550 | 0.391757  | -1.635256 |
| 12 | 6 | 0 | -2.457429 | -0.276864 | -0.826754 |
| 13 | 6 | 0 | -2.663360 | 0.083611  | 0.509971  |
| 14 | 6 | 0 | -3.286948 | -1.230265 | -1.422342 |
| 15 | 6 | 0 | -3.686591 | -0.508608 | 1.251958  |
| 16 | 6 | 0 | -4.314167 | -1.819161 | -0.681880 |
| 17 | 6 | 0 | -4.516729 | -1.466199 | 0.655064  |
| 18 | 8 | 0 | -5.519829 | -2.036914 | 1.398964  |
| 19 | 6 | 0 | 0.968874  | 1.065694  | -1.775078 |
| 20 | 6 | 0 | 0.791873  | 2.529990  | -1.445580 |
| 21 | 6 | 0 | 1.051266  | 3.010716  | -0.145108 |
| 22 | 6 | 0 | 0.395545  | 3.454081  | -2.410304 |
| 23 | 6 | 0 | 0.910084  | 4.355016  | 0.169315  |
| 24 | 6 | 0 | 0.255485  | 4.811156  | -2.102469 |
| 25 | 6 | 0 | 0.499897  | 5.328632  | -0.808879 |
| 26 | 8 | 0 | 0.372213  | 6.591996  | -0.505154 |
| 27 | 8 | 0 | 1.149942  | 4.880540  | 1.425723  |
| 28 | 6 | 0 | 1.577379  | 3.995107  | 2.459457  |
| 29 | 6 | 0 | 5.094155  | -3.012223 | -2.639481 |
| 30 | 8 | 0 | -3.971308 | -0.225609 | 2.560696  |
| 31 | 6 | 0 | -3.181560 | 0.767342  | 3.227439  |
| 32 | 1 | 0 | -0.442439 | -1.866054 | -0.963173 |
| 33 | 1 | 0 | 0.518258  | -1.471213 | -2.386893 |
| 34 | 1 | 0 | 2.731286  | -2.127444 | -2.359890 |
| 35 | 1 | 0 | 0.810846  | -1.283169 | 1.379030  |
| 36 | 1 | 0 | 4.942792  | -2.799113 | 2.400751  |
| 37 | 1 | 0 | -1.528767 | 1.471841  | -1.627405 |
| 38 | 1 | 0 | -1.444192 | 0.066065  | -2.686840 |
| 39 | 1 | 0 | -2.025734 | 0.829981  | 0.964002  |
| 40 | 1 | 0 | -3.128946 | -1.508796 | -2.456124 |
| 41 | 1 | 0 | -6.000850 | -2.659781 | 0.833336  |
| 42 | 1 | 0 | 1.962640  | 0.736697  | -1.459119 |
| 43 | 1 | 0 | 0.928244  | 0.937094  | -2.871255 |
| 44 | 1 | 0 | 1.369608  | 2.308051  | 0.616197  |
| 45 | 1 | 0 | 0.191841  | 3.116118  | -3.423212 |
| 46 | 1 | 0 | -0.053821 | 5.513597  | -2.872193 |
| 47 | 1 | 0 | 2.531324  | 3.518973  | 2.209106  |
| 48 | 1 | 0 | 1.705890  | 4.613244  | 3.348290  |
| 49 | 1 | 0 | 0.826866  | 3.223577  | 2.661107  |
| 50 | 1 | 0 | 4.961433  | -2.015134 | -3.068804 |
| 51 | 1 | 0 | 6.083623  | -3.389599 | -2.894585 |
| 52 | 1 | 0 | 4.332153  | -3.691901 | -3.031361 |
| 53 | 1 | 0 | -3.273401 | 1.738982  | 2.734119  |
| 54 | 1 | 0 | -3.584877 | 0.831668  | 4.237243  |
| 55 | 1 | 0 | -2.130229 | 0.469821  | 3.272258  |
| 56 | 8 | 0 | 2.987810  | -2.041027 | 2.864330  |
| 57 | 6 | 0 | 1.893517  | -1.618468 | 3.688915  |
| 58 | 1 | 0 | 1.021371  | -2.260372 | 3.537954  |

|    |   |   |           |           |           |
|----|---|---|-----------|-----------|-----------|
| 59 | 1 | 0 | 2.245256  | -1.714083 | 4.715148  |
| 60 | 1 | 0 | 1.631587  | -0.576704 | 3.485774  |
| 61 | 8 | 0 | -5.193007 | -2.762121 | -1.150991 |
| 62 | 6 | 0 | -5.089409 | -3.176381 | -2.519743 |
| 63 | 1 | 0 | -4.121792 | -3.647595 | -2.712928 |
| 64 | 1 | 0 | -5.885911 | -3.904353 | -2.667096 |
| 65 | 1 | 0 | -5.235882 | -2.329619 | -3.195787 |

4. ARO./X (0,2)

Sum of electronic and thermal Enthalpies= -1665.219564  
 Frequencies -- 11.3908 13.6078 15.8987

| Center Number | Atomic Number | Atomic Type | Coordinates (Angstroms) |           |           |
|---------------|---------------|-------------|-------------------------|-----------|-----------|
|               |               |             | X                       | Y         | Z         |
| 1             | 7             | 0           | -0.063270               | 0.101681  | -1.231760 |
| 2             | 6             | 0           | 0.363674                | -1.298658 | -1.436374 |
| 3             | 6             | 0           | 1.616479                | -1.679193 | -0.674711 |
| 4             | 6             | 0           | 2.790720                | -1.995685 | -1.362130 |
| 5             | 6             | 0           | 1.592081                | -1.740333 | 0.723289  |
| 6             | 6             | 0           | 3.944371                | -2.367586 | -0.663428 |
| 7             | 6             | 0           | 2.740440                | -2.110316 | 1.419857  |
| 8             | 6             | 0           | 3.920815                | -2.424350 | 0.732988  |
| 9             | 8             | 0           | 5.141015                | -2.692162 | -1.243552 |
| 10            | 8             | 0           | 5.058813                | -2.793041 | 1.404691  |
| 11            | 6             | 0           | -1.434517               | 0.295784  | -1.725466 |
| 12            | 6             | 0           | -2.489172               | -0.349362 | -0.855619 |
| 13            | 6             | 0           | -2.552469               | -0.020580 | 0.514253  |
| 14            | 6             | 0           | -3.419186               | -1.231867 | -1.430125 |
| 15            | 6             | 0           | -3.532059               | -0.567257 | 1.315181  |
| 16            | 6             | 0           | -4.413989               | -1.798386 | -0.653553 |
| 17            | 6             | 0           | -4.523033               | -1.498618 | 0.773836  |
| 18            | 8             | 0           | -5.416035               | -2.008974 | 1.492045  |
| 19            | 6             | 0           | 0.869995                | 1.041082  | -1.886522 |
| 20            | 6             | 0           | 0.690594                | 2.481585  | -1.458053 |
| 21            | 6             | 0           | 1.001573                | 2.864987  | -0.142276 |
| 22            | 6             | 0           | 0.242410                | 3.451991  | -2.352741 |
| 23            | 6             | 0           | 0.858340                | 4.187058  | 0.261255  |
| 24            | 6             | 0           | 0.096910                | 4.784755  | -1.953718 |
| 25            | 6             | 0           | 0.400038                | 5.155279  | -0.653645 |
| 26            | 8             | 0           | 0.255421                | 6.463706  | -0.266792 |
| 27            | 8             | 0           | 1.134077                | 4.675325  | 1.511109  |
| 28            | 6             | 0           | 1.611216                | 3.767092  | 2.512537  |
| 29            | 6             | 0           | 5.237412                | -2.651111 | -2.672896 |
| 30            | 8             | 0           | -3.695327               | -0.320230 | 2.628298  |
| 31            | 6             | 0           | -2.793651               | 0.592425  | 3.276939  |
| 32            | 1             | 0           | -0.458269               | -1.937134 | -1.101714 |
| 33            | 1             | 0           | 0.511965                | -1.506496 | -2.508967 |
| 34            | 1             | 0           | 2.802243                | -1.949298 | -2.443030 |
| 35            | 1             | 0           | 0.680949                | -1.505311 | 1.257154  |
| 36            | 1             | 0           | 4.875095                | -2.772421 | 2.356091  |
| 37            | 1             | 0           | -1.630255               | 1.372840  | -1.742812 |
| 38            | 1             | 0           | -1.543024               | -0.063975 | -2.761425 |

|    |   |   |           |           |           |
|----|---|---|-----------|-----------|-----------|
| 39 | 1 | 0 | -1.826546 | 0.670187  | 0.920022  |
| 40 | 1 | 0 | -3.341119 | -1.463476 | -2.484137 |
| 41 | 1 | 0 | 1.880970  | 0.717902  | -1.627969 |
| 42 | 1 | 0 | 0.784104  | 0.975080  | -2.983949 |
| 43 | 1 | 0 | 1.360510  | 2.121486  | 0.558197  |
| 44 | 1 | 0 | 0.002555  | 3.174649  | -3.373718 |
| 45 | 1 | 0 | -0.253298 | 5.540779  | -2.648044 |
| 46 | 1 | 0 | 0.509197  | 6.545979  | 0.664975  |
| 47 | 1 | 0 | 2.561245  | 3.318083  | 2.210170  |
| 48 | 1 | 0 | 1.758942  | 4.368003  | 3.408613  |
| 49 | 1 | 0 | 0.873855  | 2.984647  | 2.711500  |
| 50 | 1 | 0 | 5.046607  | -1.642919 | -3.051429 |
| 51 | 1 | 0 | 6.261995  | -2.939060 | -2.904645 |
| 52 | 1 | 0 | 4.545222  | -3.360853 | -3.134674 |
| 53 | 1 | 0 | -2.859647 | 1.584920  | 2.824427  |
| 54 | 1 | 0 | -3.120683 | 0.635379  | 4.314094  |
| 55 | 1 | 0 | -1.767171 | 0.221306  | 3.225717  |
| 56 | 8 | 0 | 2.846215  | -2.212485 | 2.782677  |
| 57 | 6 | 0 | 1.689059  | -1.937624 | 3.583740  |
| 58 | 1 | 0 | 0.877175  | -2.630047 | 3.345425  |
| 59 | 1 | 0 | 2.004610  | -2.084538 | 4.615625  |
| 60 | 1 | 0 | 1.354980  | -0.905945 | 3.445058  |
| 61 | 8 | 0 | -5.351791 | -2.654393 | -1.092702 |
| 62 | 6 | 0 | -5.357868 | -3.026551 | -2.482177 |
| 63 | 1 | 0 | -4.427939 | -3.535339 | -2.747300 |
| 64 | 1 | 0 | -6.198717 | -3.708094 | -2.595197 |
| 65 | 1 | 0 | -5.502864 | -2.147425 | -3.114566 |

5. ARO./X' (0,2)

Sum of electronic and thermal Enthalpies= -1665.219500  
 Frequencies -- 10.5257 17.6176 18.6284

| Center<br>Number | Atomic<br>Number | Atomic<br>Type | Coordinates (Angstroms) |           |           |
|------------------|------------------|----------------|-------------------------|-----------|-----------|
|                  |                  |                | X                       | Y         | Z         |
| 1                | 7                | 0              | 0.024763                | 0.076509  | -1.164031 |
| 2                | 6                | 0              | 0.332477                | -1.355596 | -1.283644 |
| 3                | 6                | 0              | 1.550238                | -1.790301 | -0.500683 |
| 4                | 6                | 0              | 2.546055                | -2.547946 | -1.140555 |
| 5                | 6                | 0              | 1.648074                | -1.474569 | 0.870059  |
| 6                | 6                | 0              | 3.646143                | -2.994388 | -0.431171 |
| 7                | 6                | 0              | 2.733563                | -1.902736 | 1.604456  |
| 8                | 6                | 0              | 3.804396                | -2.688716 | 0.990058  |
| 9                | 8                | 0              | 4.656196                | -3.721741 | -0.937572 |
| 10               | 8                | 0              | 4.799583                | -3.080373 | 1.645539  |
| 11               | 6                | 0              | -1.331628               | 0.361762  | -1.671943 |
| 12               | 6                | 0              | -2.444750               | -0.206087 | -0.815372 |
| 13               | 6                | 0              | -2.629296               | 0.255095  | 0.493292  |
| 14               | 6                | 0              | -3.310704               | -1.168453 | -1.340512 |
| 15               | 6                | 0              | -3.669554               | -0.245318 | 1.277988  |
| 16               | 6                | 0              | -4.353361               | -1.667092 | -0.556767 |
| 17               | 6                | 0              | -4.536751               | -1.211803 | 0.751918  |
| 18               | 8                | 0              | -5.556165               | -1.690246 | 1.535731  |

|    |   |   |           |           |           |
|----|---|---|-----------|-----------|-----------|
| 19 | 6 | 0 | 1.036291  | 0.880481  | -1.882859 |
| 20 | 6 | 0 | 0.966180  | 2.364671  | -1.594472 |
| 21 | 6 | 0 | 1.259471  | 2.848276  | -0.308026 |
| 22 | 6 | 0 | 0.638285  | 3.276499  | -2.596543 |
| 23 | 6 | 0 | 1.214983  | 4.211154  | -0.038255 |
| 24 | 6 | 0 | 0.594150  | 4.649052  | -2.332919 |
| 25 | 6 | 0 | 0.877886  | 5.119349  | -1.060884 |
| 26 | 8 | 0 | 0.830948  | 6.466946  | -0.807777 |
| 27 | 8 | 0 | 1.482053  | 4.795170  | 1.171844  |
| 28 | 6 | 0 | 1.857653  | 3.955386  | 2.271334  |
| 29 | 6 | 0 | 4.616301  | -4.096215 | -2.325879 |
| 30 | 8 | 0 | -3.937645 | 0.138895  | 2.563648  |
| 31 | 6 | 0 | -3.106247 | 1.142197  | 3.160170  |
| 32 | 1 | 0 | -0.528145 | -1.911606 | -0.896698 |
| 33 | 1 | 0 | 0.453248  | -1.652664 | -2.338200 |
| 34 | 1 | 0 | 2.439388  | -2.770032 | -2.194067 |
| 35 | 1 | 0 | 0.858406  | -0.898527 | 1.331597  |
| 36 | 1 | 0 | -1.435993 | 1.448543  | -1.712530 |
| 37 | 1 | 0 | -1.446360 | -0.008005 | -2.704575 |
| 38 | 1 | 0 | -1.961628 | 1.007113  | 0.891617  |
| 39 | 1 | 0 | -3.169421 | -1.522979 | -2.353152 |
| 40 | 1 | 0 | -6.062949 | -2.333036 | 1.016509  |
| 41 | 1 | 0 | 2.018036  | 0.505590  | -1.580597 |
| 42 | 1 | 0 | 0.956241  | 0.720781  | -2.971122 |
| 43 | 1 | 0 | 1.525862  | 2.150678  | 0.475726  |
| 44 | 1 | 0 | 0.412323  | 2.920879  | -3.596159 |
| 45 | 1 | 0 | 0.337978  | 5.359501  | -3.111326 |
| 46 | 1 | 0 | 1.058162  | 6.620026  | 0.121753  |
| 47 | 1 | 0 | 2.778515  | 3.409887  | 2.047535  |
| 48 | 1 | 0 | 2.025034  | 4.627847  | 3.111367  |
| 49 | 1 | 0 | 1.056190  | 3.253195  | 2.516551  |
| 50 | 1 | 0 | 4.619111  | -3.208834 | -2.963407 |
| 51 | 1 | 0 | 5.520990  | -4.676975 | -2.495015 |
| 52 | 1 | 0 | 3.735692  | -4.708977 | -2.533301 |
| 53 | 1 | 0 | -3.162450 | 2.081582  | 2.602983  |
| 54 | 1 | 0 | -3.501625 | 1.289951  | 4.164298  |
| 55 | 1 | 0 | -2.067311 | 0.806631  | 3.222561  |
| 56 | 8 | 0 | 2.930902  | -1.668638 | 2.914974  |
| 57 | 6 | 0 | 1.941769  | -0.917907 | 3.639176  |
| 58 | 1 | 0 | 0.979289  | -1.435153 | 3.623885  |
| 59 | 1 | 0 | 2.313524  | -0.857401 | 4.660303  |
| 60 | 1 | 0 | 1.838178  | 0.086327  | 3.221043  |
| 61 | 8 | 0 | -5.266616 | -2.609395 | -0.953595 |
| 62 | 6 | 0 | -5.175691 | -3.136826 | -2.283912 |
| 63 | 1 | 0 | -4.222400 | -3.650367 | -2.435896 |
| 64 | 1 | 0 | -5.993546 | -3.850388 | -2.373181 |
| 65 | 1 | 0 | -5.297343 | -2.343919 | -3.026931 |

6. ARO./Y (0,2)

Sum of electronic and thermal Enthalpies= -1665.212834  
 Frequencies -- 13.6679 15.1585 16.9695

Center Atomic Atomic Coordinates (Angstroms)

| Number | Number | Type | X         | Y         | Z         |
|--------|--------|------|-----------|-----------|-----------|
| 1      | 7      | 0    | 0.035355  | 0.189155  | -1.187617 |
| 2      | 6      | 0    | 0.395508  | -1.229090 | -1.392340 |
| 3      | 6      | 0    | 1.614462  | -1.672199 | -0.609823 |
| 4      | 6      | 0    | 2.795978  | -2.009814 | -1.274977 |
| 5      | 6      | 0    | 1.551585  | -1.765911 | 0.785262  |
| 6      | 6      | 0    | 3.918531  | -2.435144 | -0.556485 |
| 7      | 6      | 0    | 2.668690  | -2.190263 | 1.501412  |
| 8      | 6      | 0    | 3.856159  | -2.525524 | 0.837041  |
| 9      | 8      | 0    | 5.119196  | -2.783868 | -1.113772 |
| 10     | 8      | 0    | 4.963486  | -2.947993 | 1.527859  |
| 11     | 6      | 0    | -1.317092 | 0.469556  | -1.712885 |
| 12     | 6      | 0    | -2.434922 | -0.176504 | -0.920523 |
| 13     | 6      | 0    | -2.647056 | 0.182690  | 0.415566  |
| 14     | 6      | 0    | -3.278977 | -1.107232 | -1.531198 |
| 15     | 6      | 0    | -3.692044 | -0.389143 | 1.142855  |
| 16     | 6      | 0    | -4.327446 | -1.676167 | -0.805191 |
| 17     | 6      | 0    | -4.536808 | -1.324723 | 0.531444  |
| 18     | 8      | 0    | -5.560013 | -1.874964 | 1.261037  |
| 19     | 6      | 0    | 1.023019  | 1.072804  | -1.825579 |
| 20     | 6      | 0    | 0.920653  | 2.516895  | -1.395375 |
| 21     | 6      | 0    | 0.981276  | 2.853749  | -0.036675 |
| 22     | 6      | 0    | 0.806511  | 3.542473  | -2.372928 |
| 23     | 6      | 0    | 0.927702  | 4.180903  | 0.361800  |
| 24     | 6      | 0    | 0.746682  | 4.861274  | -2.011747 |
| 25     | 6      | 0    | 0.800024  | 5.261804  | -0.628212 |
| 26     | 8      | 0    | 0.744204  | 6.465821  | -0.269027 |
| 27     | 8      | 0    | 0.990416  | 4.609595  | 1.628480  |
| 28     | 6      | 0    | 1.139700  | 3.648126  | 2.690132  |
| 29     | 6      | 0    | 5.257453  | -2.702030 | -2.537827 |
| 30     | 8      | 0    | -3.985577 | -0.106161 | 2.449113  |
| 31     | 6      | 0    | -3.181465 | 0.864553  | 3.130781  |
| 32     | 1      | 0    | -0.463298 | -1.824864 | -1.075277 |
| 33     | 1      | 0    | 0.553053  | -1.439338 | -2.463274 |
| 34     | 1      | 0    | 2.836763  | -1.940121 | -2.353926 |
| 35     | 1      | 0    | 0.634705  | -1.514140 | 1.301569  |
| 36     | 1      | 0    | 4.748321  | -2.964179 | 2.472624  |
| 37     | 1      | 0    | -1.451981 | 1.554685  | -1.691238 |
| 38     | 1      | 0    | -1.396174 | 0.161029  | -2.768446 |
| 39     | 1      | 0    | -1.997427 | 0.911287  | 0.881239  |
| 40     | 1      | 0    | -3.115739 | -1.383805 | -2.564670 |
| 41     | 1      | 0    | -6.046557 | -2.487912 | 0.689286  |
| 42     | 1      | 0    | 2.018228  | 0.710573  | -1.547713 |
| 43     | 1      | 0    | 0.959837  | 1.015958  | -2.924422 |
| 44     | 1      | 0    | 1.077084  | 2.064864  | 0.697240  |
| 45     | 1      | 0    | 0.761544  | 3.262677  | -3.419994 |
| 46     | 1      | 0    | 0.652256  | 5.649276  | -2.750813 |
| 47     | 1      | 0    | 2.070029  | 3.088644  | 2.569387  |
| 48     | 1      | 0    | 1.172735  | 4.233690  | 3.606606  |
| 49     | 1      | 0    | 0.286023  | 2.967079  | 2.712438  |
| 50     | 1      | 0    | 5.108534  | -1.677112 | -2.889385 |
| 51     | 1      | 0    | 6.278868  | -3.015036 | -2.750334 |
| 52     | 1      | 0    | 4.557112  | -3.374914 | -3.040754 |

|    |   |   |           |           |           |
|----|---|---|-----------|-----------|-----------|
| 53 | 1 | 0 | -3.245612 | 1.840842  | 2.642133  |
| 54 | 1 | 0 | -3.594990 | 0.932526  | 4.136162  |
| 55 | 1 | 0 | -2.137792 | 0.542680  | 3.186177  |
| 56 | 8 | 0 | 2.734829  | -2.329174 | 2.863277  |
| 57 | 6 | 0 | 1.563859  | -2.042685 | 3.640097  |
| 58 | 1 | 0 | 0.739837  | -2.704797 | 3.360846  |
| 59 | 1 | 0 | 1.846521  | -2.226104 | 4.675663  |
| 60 | 1 | 0 | 1.262637  | -0.998566 | 3.520879  |
| 61 | 8 | 0 | -5.222394 | -2.595459 | -1.288247 |
| 62 | 6 | 0 | -5.108697 | -3.012126 | -2.655636 |
| 63 | 1 | 0 | -4.149751 | -3.506081 | -2.834495 |
| 64 | 1 | 0 | -5.920012 | -3.720952 | -2.814671 |
| 65 | 1 | 0 | -5.225121 | -2.161983 | -3.333206 |

7. Radical Cation (1,2)

Sum of electronic and thermal Enthalpies= -1665.639009  
 Frequencies -- 13.5166 15.0281 18.0763

| Center<br>Number | Atomic<br>Number | Atomic<br>Type | Coordinates (Angstroms) |           |           |
|------------------|------------------|----------------|-------------------------|-----------|-----------|
|                  |                  |                | X                       | Y         | Z         |
| 1                | 7                | 0              | -0.031783               | 0.084684  | -1.165258 |
| 2                | 6                | 0              | 0.499294                | -1.279127 | -1.392847 |
| 3                | 6                | 0              | 1.810836                | -1.561913 | -0.691776 |
| 4                | 6                | 0              | 2.964796                | -1.802373 | -1.442120 |
| 5                | 6                | 0              | 1.866962                | -1.613275 | 0.705973  |
| 6                | 6                | 0              | 4.178311                | -2.087594 | -0.808067 |
| 7                | 6                | 0              | 3.075803                | -1.896159 | 1.338328  |
| 8                | 6                | 0              | 4.235956                | -2.132720 | 0.588171  |
| 9                | 8                | 0              | 5.359697                | -2.332855 | -1.452466 |
| 10               | 8                | 0              | 5.430873                | -2.412829 | 1.198582  |
| 11               | 6                | 0              | -1.402183               | 0.179116  | -1.669535 |
| 12               | 6                | 0              | -2.423504               | -0.525536 | -0.815334 |
| 13               | 6                | 0              | -2.383607               | -0.369882 | 0.587203  |
| 14               | 6                | 0              | -3.433165               | -1.280555 | -1.446720 |
| 15               | 6                | 0              | -3.344778               | -0.962015 | 1.377731  |
| 16               | 6                | 0              | -4.403922               | -1.891027 | -0.683413 |
| 17               | 6                | 0              | -4.379818               | -1.741102 | 0.749808  |
| 18               | 8                | 0              | -5.292144               | -2.297677 | 1.509153  |
| 19               | 6                | 0              | 0.829636                | 1.106977  | -1.798555 |
| 20               | 6                | 0              | 0.497918                | 2.523144  | -1.383334 |
| 21               | 6                | 0              | 0.754305                | 2.946832  | -0.068264 |
| 22               | 6                | 0              | -0.043960               | 3.433535  | -2.290214 |
| 23               | 6                | 0              | 0.466105                | 4.248469  | 0.323572  |
| 24               | 6                | 0              | -0.336973               | 4.744817  | -1.902721 |
| 25               | 6                | 0              | -0.088274               | 5.154861  | -0.602738 |
| 26               | 8                | 0              | -0.379795               | 6.441164  | -0.228799 |
| 27               | 8                | 0              | 0.677004                | 4.771657  | 1.570805  |
| 28               | 6                | 0              | 1.264920                | 3.935114  | 2.576200  |
| 29               | 6                | 0              | 5.371872                | -2.305071 | -2.885569 |
| 30               | 8                | 0              | -3.445652               | -0.892565 | 2.705416  |
| 31               | 6                | 0              | -2.470972               | -0.118519 | 3.437242  |
| 32               | 1                | 0              | -0.255900               | -1.981750 | -1.029109 |

|    |   |   |           |           |           |
|----|---|---|-----------|-----------|-----------|
| 33 | 1 | 0 | 0.618656  | -1.468375 | -2.471854 |
| 34 | 1 | 0 | 2.912656  | -1.762886 | -2.522036 |
| 35 | 1 | 0 | 0.972844  | -1.438408 | 1.289129  |
| 36 | 1 | 0 | 5.297801  | -2.389837 | 2.158581  |
| 37 | 1 | 0 | -1.686172 | 1.239642  | -1.683824 |
| 38 | 1 | 0 | -1.483784 | -0.178307 | -2.708253 |
| 39 | 1 | 0 | -1.597670 | 0.226952  | 1.025498  |
| 40 | 1 | 0 | -3.429708 | -1.381365 | -2.523380 |
| 41 | 1 | 0 | -5.942123 | -2.787550 | 0.969692  |
| 42 | 1 | 0 | 1.857701  | 0.880008  | -1.508979 |
| 43 | 1 | 0 | 0.780264  | 1.029066  | -2.897004 |
| 44 | 1 | 0 | 1.184924  | 2.251204  | 0.640806  |
| 45 | 1 | 0 | -0.240469 | 3.125722  | -3.311625 |
| 46 | 1 | 0 | -0.759249 | 5.454215  | -2.606009 |
| 47 | 1 | 0 | -0.148472 | 6.560502  | 0.704877  |
| 48 | 1 | 0 | 2.260825  | 3.602194  | 2.271339  |
| 49 | 1 | 0 | 1.342488  | 4.556496  | 3.467045  |
| 50 | 1 | 0 | 0.628361  | 3.070957  | 2.784985  |
| 51 | 1 | 0 | 5.088425  | -1.318337 | -3.262470 |
| 52 | 1 | 0 | 6.399627  | -2.523132 | -3.172712 |
| 53 | 1 | 0 | 4.706865  | -3.068335 | -3.299473 |
| 54 | 1 | 0 | -2.513820 | 0.927780  | 3.128248  |
| 55 | 1 | 0 | -2.756477 | -0.215587 | 4.482000  |
| 56 | 1 | 0 | -1.470694 | -0.525849 | 3.278397  |
| 57 | 8 | 0 | 3.266538  | -1.980900 | 2.692448  |
| 58 | 6 | 0 | 2.147190  | -1.759903 | 3.560373  |
| 59 | 1 | 0 | 1.363926  | -2.501874 | 3.382968  |
| 60 | 1 | 0 | 2.533690  | -1.871286 | 4.572350  |
| 61 | 1 | 0 | 1.746163  | -0.751285 | 3.429113  |
| 62 | 8 | 0 | -5.415542 | -2.647515 | -1.107640 |
| 63 | 6 | 0 | -5.572732 | -2.890317 | -2.523976 |
| 64 | 1 | 0 | -4.686724 | -3.393638 | -2.915139 |
| 65 | 1 | 0 | -6.443920 | -3.535176 | -2.607629 |
| 66 | 1 | 0 | -5.745486 | -1.947040 | -3.045202 |

### S1.3-Compound 3

ArOH (0,1)

Sum of electronic and thermal Enthalpies= -1616.879303

Frequencies -- 13.4166 14.0959 16.7797

| Center Number | Atomic Number | Atomic Type | Coordinates (Angstroms) |           |           |
|---------------|---------------|-------------|-------------------------|-----------|-----------|
|               |               |             | X                       | Y         | Z         |
| 1             | 7             | 0           | 0.047508                | 0.131401  | -1.254813 |
| 2             | 6             | 0           | 1.156800                | -0.803632 | -1.468494 |
| 3             | 6             | 0           | 2.236441                | -0.692524 | -0.425529 |
| 4             | 6             | 0           | 3.594067                | -0.640295 | -0.816419 |
| 5             | 6             | 0           | 1.917674                | -0.686056 | 0.954415  |
| 6             | 6             | 0           | 4.589014                | -0.599963 | 0.123972  |
| 7             | 6             | 0           | 2.898718                | -0.626481 | 1.906502  |
| 8             | 6             | 0           | 4.308573                | -0.570376 | 1.560886  |
| 9             | 8             | 0           | 5.189209                | -0.464585 | 2.436250  |
| 10            | 6             | 0           | -1.139728               | -0.276518 | -2.023691 |
| 11            | 6             | 0           | -1.807905               | -1.522449 | -1.481417 |

|    |   |   |           |           |           |
|----|---|---|-----------|-----------|-----------|
| 12 | 6 | 0 | -2.205417 | -1.599147 | -0.158533 |
| 13 | 6 | 0 | -2.074492 | -2.624817 | -2.315925 |
| 14 | 6 | 0 | -2.850258 | -2.745014 | 0.331610  |
| 15 | 6 | 0 | -2.719445 | -3.756500 | -1.849196 |
| 16 | 6 | 0 | -3.126238 | -3.848653 | -0.513605 |
| 17 | 8 | 0 | -3.745296 | -4.975018 | -0.125008 |
| 18 | 6 | 0 | 0.464096  | 1.510731  | -1.592710 |
| 19 | 6 | 0 | -0.515246 | 2.574674  | -1.149779 |
| 20 | 6 | 0 | -0.779311 | 2.768089  | 0.216902  |
| 21 | 6 | 0 | -1.147812 | 3.396855  | -2.081112 |
| 22 | 6 | 0 | -1.662014 | 3.758168  | 0.631302  |
| 23 | 6 | 0 | -2.033169 | 4.398066  | -1.670679 |
| 24 | 6 | 0 | -2.293925 | 4.580995  | -0.322099 |
| 25 | 8 | 0 | -3.163167 | 5.563748  | 0.075778  |
| 26 | 8 | 0 | -1.995532 | 4.038964  | 1.929253  |
| 27 | 6 | 0 | -1.392733 | 3.266432  | 2.976184  |
| 28 | 1 | 0 | 0.757632  | -1.823958 | -1.409051 |
| 29 | 1 | 0 | 1.598074  | -0.696951 | -2.471571 |
| 30 | 1 | 0 | 3.850253  | -0.648117 | -1.869238 |
| 31 | 1 | 0 | 0.877439  | -0.732587 | 1.251579  |
| 32 | 1 | 0 | 2.663081  | -0.613862 | 2.964529  |
| 33 | 1 | 0 | -1.852597 | 0.550504  | -1.982475 |
| 34 | 1 | 0 | -0.894838 | -0.431013 | -3.086788 |
| 35 | 1 | 0 | -2.027493 | -0.776659 | 0.520250  |
| 36 | 1 | 0 | -1.767451 | -2.587668 | -3.355862 |
| 37 | 1 | 0 | -2.919972 | -4.597383 | -2.502488 |
| 38 | 1 | 0 | -3.972090 | -4.892418 | 0.825082  |
| 39 | 1 | 0 | 1.426261  | 1.682810  | -1.100673 |
| 40 | 1 | 0 | 0.639107  | 1.608460  | -2.676295 |
| 41 | 1 | 0 | -0.287569 | 2.141296  | 0.949785  |
| 42 | 1 | 0 | -0.953327 | 3.261369  | -3.139655 |
| 43 | 1 | 0 | -2.526285 | 5.038792  | -2.393543 |
| 44 | 1 | 0 | -3.228305 | 5.551979  | 1.042715  |
| 45 | 1 | 0 | -0.306095 | 3.388199  | 2.972473  |
| 46 | 1 | 0 | -1.802356 | 3.660135  | 3.905135  |
| 47 | 1 | 0 | -1.652313 | 2.208802  | 2.878774  |
| 48 | 7 | 0 | 5.970274  | -0.574220 | -0.342600 |
| 49 | 8 | 0 | 6.811945  | -1.191454 | 0.301722  |
| 50 | 8 | 0 | 6.222326  | 0.056314  | -1.368421 |
| 51 | 7 | 0 | -3.226335 | -2.765971 | 1.719660  |
| 52 | 8 | 0 | -2.967893 | -1.803021 | 2.436869  |
| 53 | 8 | 0 | -3.810022 | -3.774908 | 2.166818  |

1. ArO-/X (-1,1)

Sum of electronic and thermal Enthalpies= -1616.427150  
 Frequencies -- 12.1894 17.1069 18.6028

| Center<br>Number | Atomic<br>Number | Atomic<br>Type | Coordinates (Angstroms) |           |           |
|------------------|------------------|----------------|-------------------------|-----------|-----------|
|                  |                  |                | X                       | Y         | Z         |
| 1                | 7                | 0              | 0.076677                | -0.054809 | -1.263579 |
| 2                | 6                | 0              | 0.961382                | -1.227687 | -1.411294 |
| 3                | 6                | 0              | 2.074375                | -1.279510 | -0.391711 |



|    |   |   |           |           |           |
|----|---|---|-----------|-----------|-----------|
| 4  | 6 | 0 | 3.393837  | -1.211271 | -0.759485 |
| 5  | 6 | 0 | 1.777980  | -1.434243 | 0.994300  |
| 6  | 6 | 0 | 4.446852  | -1.286292 | 0.191334  |
| 7  | 6 | 0 | 2.765648  | -1.504851 | 1.935804  |
| 8  | 6 | 0 | 4.174778  | -1.430013 | 1.614683  |
| 9  | 8 | 0 | 5.039679  | -1.490045 | 2.537454  |
| 10 | 6 | 0 | -1.162276 | -0.231137 | -2.039787 |
| 11 | 6 | 0 | -2.099406 | -1.267860 | -1.456909 |
| 12 | 6 | 0 | -2.671438 | -1.082573 | -0.210825 |
| 13 | 6 | 0 | -2.436765 | -2.433536 | -2.170597 |
| 14 | 6 | 0 | -3.553870 | -2.034318 | 0.323139  |
| 15 | 6 | 0 | -3.308250 | -3.379412 | -1.658958 |
| 16 | 6 | 0 | -3.888724 | -3.208179 | -0.397920 |
| 17 | 8 | 0 | -4.720636 | -4.165248 | 0.044672  |
| 18 | 6 | 0 | 0.770703  | 1.187329  | -1.656353 |
| 19 | 6 | 0 | 0.060667  | 2.450239  | -1.216618 |
| 20 | 6 | 0 | -0.080107 | 2.734929  | 0.152349  |
| 21 | 6 | 0 | -0.439551 | 3.359200  | -2.147303 |
| 22 | 6 | 0 | -0.713139 | 3.899335  | 0.570486  |
| 23 | 6 | 0 | -1.075786 | 4.534364  | -1.733566 |
| 24 | 6 | 0 | -1.216611 | 4.806379  | -0.382490 |
| 25 | 8 | 0 | -1.843715 | 5.959460  | 0.019145  |
| 26 | 8 | 0 | -0.905554 | 4.282276  | 1.871949  |
| 27 | 6 | 0 | -0.425587 | 3.427146  | 2.918404  |
| 28 | 1 | 0 | 0.336809  | -2.118086 | -1.294613 |
| 29 | 1 | 0 | 1.390899  | -1.271735 | -2.425945 |
| 30 | 1 | 0 | 3.658122  | -1.098087 | -1.802425 |
| 31 | 1 | 0 | 0.740050  | -1.502257 | 1.306349  |
| 32 | 1 | 0 | 2.523185  | -1.626469 | 2.986658  |
| 33 | 1 | 0 | -1.677512 | 0.731864  | -2.058458 |
| 34 | 1 | 0 | -0.941230 | -0.494297 | -3.087449 |
| 35 | 1 | 0 | -2.448875 | -0.199618 | 0.373029  |
| 36 | 1 | 0 | -2.001915 | -2.597710 | -3.151024 |
| 37 | 1 | 0 | -3.557050 | -4.273615 | -2.218158 |
| 38 | 1 | 0 | -5.045475 | -3.905979 | 0.932788  |
| 39 | 1 | 0 | 1.761987  | 1.159082  | -1.197616 |
| 40 | 1 | 0 | 0.926552  | 1.220286  | -2.747598 |
| 41 | 1 | 0 | 0.312935  | 2.039577  | 0.883110  |
| 42 | 1 | 0 | -0.336818 | 3.156537  | -3.208111 |
| 43 | 1 | 0 | -1.467478 | 5.242027  | -2.456193 |
| 44 | 1 | 0 | -1.856421 | 5.987333  | 0.987860  |
| 45 | 1 | 0 | 0.659190  | 3.305443  | 2.855086  |
| 46 | 1 | 0 | -0.684065 | 3.928877  | 3.849748  |
| 47 | 1 | 0 | -0.915133 | 2.450351  | 2.878348  |
| 48 | 7 | 0 | 5.764184  | -1.209949 | -0.308373 |
| 49 | 8 | 0 | 6.745252  | -1.282265 | 0.460740  |
| 50 | 8 | 0 | 5.950145  | -1.068623 | -1.544351 |
| 51 | 7 | 0 | -4.114269 | -1.781610 | 1.623193  |
| 52 | 8 | 0 | -3.815279 | -0.755777 | 2.228512  |
| 53 | 8 | 0 | -4.898914 | -2.621925 | 2.111355  |

2. ARO-/X' (-1,1)

Sum of electronic and thermal Enthalpies= -1616.426089

Frequencies -- 8.9037 13.2335 14.6004

| Center<br>Number | Atomic<br>Number | Atomic<br>Type | Coordinates (Angstroms) |           |           |
|------------------|------------------|----------------|-------------------------|-----------|-----------|
|                  |                  |                | X                       | Y         | Z         |
| 1                | 7                | 0              | -0.042988               | 0.079534  | -1.267438 |
| 2                | 6                | 0              | 0.876586                | -1.040764 | -1.526522 |
| 3                | 6                | 0              | 2.011761                | -1.124774 | -0.530720 |
| 4                | 6                | 0              | 3.327067                | -0.984520 | -0.923592 |
| 5                | 6                | 0              | 1.750003                | -1.381417 | 0.832976  |
| 6                | 6                | 0              | 4.374057                | -1.096290 | 0.010712  |
| 7                | 6                | 0              | 2.765821                | -1.493085 | 1.761234  |
| 8                | 6                | 0              | 4.106879                | -1.355241 | 1.376367  |
| 9                | 8                | 0              | 5.044938                | -1.483559 | 2.326866  |
| 10               | 6                | 0              | -1.315326               | -0.107800 | -1.985990 |
| 11               | 6                | 0              | -2.168635               | -1.241260 | -1.453303 |
| 12               | 6                | 0              | -2.466733               | -1.361464 | -0.117644 |
| 13               | 6                | 0              | -2.725012               | -2.202567 | -2.341745 |
| 14               | 6                | 0              | -3.287529               | -2.405942 | 0.377809  |
| 15               | 6                | 0              | -3.538787               | -3.210643 | -1.899665 |
| 16               | 6                | 0              | -3.889850               | -3.391317 | -0.510564 |
| 17               | 8                | 0              | -4.657391               | -4.338799 | -0.164065 |
| 18               | 6                | 0              | 0.584316                | 1.365889  | -1.624934 |
| 19               | 6                | 0              | -0.170731               | 2.579964  | -1.125865 |
| 20               | 6                | 0              | -0.351735               | 2.780220  | 0.252861  |
| 21               | 6                | 0              | -0.670619               | 3.529934  | -2.014855 |
| 22               | 6                | 0              | -1.023549               | 3.903278  | 0.721330  |
| 23               | 6                | 0              | -1.343551               | 4.664548  | -1.550214 |
| 24               | 6                | 0              | -1.523614               | 4.854001  | -0.189632 |
| 25               | 8                | 0              | -2.186035               | 5.968867  | 0.260651  |
| 26               | 8                | 0              | -1.258266               | 4.202074  | 2.037633  |
| 27               | 6                | 0              | -0.801712               | 3.285526  | 3.041643  |
| 28               | 1                | 0              | 0.294323                | -1.963546 | -1.462658 |
| 29               | 1                | 0              | 1.289104                | -0.992761 | -2.547695 |
| 30               | 1                | 0              | 3.576250                | -0.788141 | -1.958001 |
| 31               | 1                | 0              | 0.723856                | -1.501927 | 1.161977  |
| 32               | 1                | 0              | 2.554470                | -1.698039 | 2.804097  |
| 33               | 1                | 0              | 5.925404                | -1.371760 | 1.908018  |
| 34               | 1                | 0              | -1.871596               | 0.829998  | -1.903640 |
| 35               | 1                | 0              | -1.138367               | -0.270246 | -3.062967 |
| 36               | 1                | 0              | -2.065591               | -0.652021 | 0.592180  |
| 37               | 1                | 0              | -2.496321               | -2.130842 | -3.401706 |
| 38               | 1                | 0              | -3.954795               | -3.931967 | -2.595640 |
| 39               | 1                | 0              | 1.587319                | 1.368543  | -1.189270 |
| 40               | 1                | 0              | 0.714157                | 1.447392  | -2.717306 |
| 41               | 1                | 0              | 0.037399                | 2.051509  | 0.952387  |
| 42               | 1                | 0              | -0.540026               | 3.390465  | -3.082742 |
| 43               | 1                | 0              | -1.735402               | 5.403636  | -2.240571 |
| 44               | 1                | 0              | -2.233726               | 5.936500  | 1.228124  |
| 45               | 1                | 0              | 0.286948                | 3.186854  | 3.012674  |
| 46               | 1                | 0              | -1.104970               | 3.717770  | 3.994054  |
| 47               | 1                | 0              | -1.270388               | 2.305800  | 2.916074  |
| 48               | 7                | 0              | 5.720612                | -0.943538 | -0.459369 |
| 49               | 8                | 0              | 5.932086                | -0.715819 | -1.648487 |

|    |   |   |           |           |          |
|----|---|---|-----------|-----------|----------|
| 50 | 8 | 0 | 6.658561  | -1.045395 | 0.361204 |
| 51 | 7 | 0 | -3.494798 | -2.444349 | 1.776108 |
| 52 | 8 | 0 | -4.165482 | -3.359048 | 2.296538 |
| 53 | 8 | 0 | -2.989971 | -1.550371 | 2.500834 |

3. ARO-/Y (-1,1)

Sum of electronic and thermal Enthalpies= -1616.413571  
 Frequencies -- 15.3304 16.9600 19.0551

| Center<br>Number | Atomic<br>Number | Atomic<br>Type | Coordinates (Angstroms) |   |   |
|------------------|------------------|----------------|-------------------------|---|---|
|                  |                  |                | X                       | Y | Z |

|    |   |   |           |           |           |
|----|---|---|-----------|-----------|-----------|
| 1  | 7 | 0 | 0.025337  | -0.076087 | -1.260191 |
| 2  | 6 | 0 | -0.872860 | 1.066662  | -1.490849 |
| 3  | 6 | 0 | -2.003820 | 1.149537  | -0.489548 |
| 4  | 6 | 0 | -3.323567 | 1.124926  | -0.891672 |
| 5  | 6 | 0 | -1.732505 | 1.290113  | 0.888948  |
| 6  | 6 | 0 | -4.365597 | 1.234637  | 0.048442  |
| 7  | 6 | 0 | -2.743493 | 1.393358  | 1.823383  |
| 8  | 6 | 0 | -4.088947 | 1.365905  | 1.430262  |
| 9  | 8 | 0 | -5.020610 | 1.469398  | 2.390109  |
| 10 | 6 | 0 | 1.289920  | 0.093863  | -1.992108 |
| 11 | 6 | 0 | 2.165766  | 1.198302  | -1.438967 |
| 12 | 6 | 0 | 2.602873  | 1.170431  | -0.126425 |
| 13 | 6 | 0 | 2.580910  | 2.272360  | -2.249155 |
| 14 | 6 | 0 | 3.425504  | 2.189836  | 0.377854  |
| 15 | 6 | 0 | 3.399569  | 3.279483  | -1.768650 |
| 16 | 6 | 0 | 3.841600  | 3.268772  | -0.441702 |
| 17 | 8 | 0 | 4.625752  | 4.280578  | -0.034560 |
| 18 | 6 | 0 | -0.635419 | -1.350874 | -1.628730 |
| 19 | 6 | 0 | 0.094443  | -2.591311 | -1.169351 |
| 20 | 6 | 0 | 0.173802  | -2.908979 | 0.202735  |
| 21 | 6 | 0 | 0.686255  | -3.470899 | -2.073623 |
| 22 | 6 | 0 | 0.823676  | -4.053073 | 0.642865  |
| 23 | 6 | 0 | 1.340994  | -4.627498 | -1.638413 |
| 24 | 6 | 0 | 1.446328  | -4.976163 | -0.271147 |
| 25 | 8 | 0 | 2.053213  | -6.052043 | 0.150090  |
| 26 | 8 | 0 | 0.927019  | -4.413362 | 1.973631  |
| 27 | 6 | 0 | 0.340250  | -3.559031 | 2.954291  |
| 28 | 1 | 0 | -0.276260 | 1.979356  | -1.408132 |
| 29 | 1 | 0 | -1.289901 | 1.051235  | -2.511275 |
| 30 | 1 | 0 | -3.580106 | 1.019628  | -1.937532 |
| 31 | 1 | 0 | -0.702552 | 1.320698  | 1.226008  |
| 32 | 1 | 0 | -2.524296 | 1.502967  | 2.878964  |
| 33 | 1 | 0 | -5.905111 | 1.433091  | 1.967279  |
| 34 | 1 | 0 | 1.831931  | -0.852366 | -1.925215 |
| 35 | 1 | 0 | 1.109858  | 0.282021  | -3.063815 |
| 36 | 1 | 0 | 2.317254  | 0.362614  | 0.533417  |
| 37 | 1 | 0 | 2.249479  | 2.314450  | -3.281443 |
| 38 | 1 | 0 | 3.709685  | 4.101192  | -2.403339 |
| 39 | 1 | 0 | 4.845543  | 4.139216  | 0.910261  |
| 40 | 1 | 0 | -1.632682 | -1.325463 | -1.180709 |
| 41 | 1 | 0 | -0.782035 | -1.400066 | -2.721349 |

|    |   |   |           |           |           |
|----|---|---|-----------|-----------|-----------|
| 42 | 1 | 0 | -0.288754 | -2.240801 | 0.919860  |
| 43 | 1 | 0 | 0.637985  | -3.257114 | -3.138351 |
| 44 | 1 | 0 | 1.794710  | -5.299497 | -2.362296 |
| 45 | 1 | 0 | -0.742509 | -3.473441 | 2.813920  |
| 46 | 1 | 0 | 0.542017  | -4.027741 | 3.917699  |
| 47 | 1 | 0 | 0.790610  | -2.561004 | 2.936293  |
| 48 | 7 | 0 | -5.717151 | 1.208773  | -0.432143 |
| 49 | 8 | 0 | -5.936500 | 1.104598  | -1.637007 |
| 50 | 8 | 0 | -6.650802 | 1.294134  | 0.394908  |
| 51 | 7 | 0 | 3.835730  | 2.108357  | 1.753722  |
| 52 | 8 | 0 | 4.558544  | 3.015036  | 2.218687  |
| 53 | 8 | 0 | 3.470087  | 1.161859  | 2.445317  |

4. ARO./X (0,2)

Sum of electronic and thermal Enthalpies= -1616.237055  
 Frequencies -- 9.1993 13.3384 14.5820

| Center<br>Number | Atomic<br>Number | Atomic<br>Type | Coordinates (Angstroms) |           |           |
|------------------|------------------|----------------|-------------------------|-----------|-----------|
|                  |                  |                | X                       | Y         | Z         |
| 1                | 7                | 0              | 0.047508                | 0.131401  | -1.254813 |
| 2                | 6                | 0              | 1.156800                | -0.803632 | -1.468494 |
| 3                | 6                | 0              | 2.236441                | -0.692524 | -0.425529 |
| 4                | 6                | 0              | 3.594067                | -0.640295 | -0.816419 |
| 5                | 6                | 0              | 1.917674                | -0.686056 | 0.954415  |
| 6                | 6                | 0              | 4.589014                | -0.599963 | 0.123972  |
| 7                | 6                | 0              | 2.898718                | -0.626481 | 1.906502  |
| 8                | 6                | 0              | 4.308573                | -0.570376 | 1.560886  |
| 9                | 8                | 0              | 5.189209                | -0.464585 | 2.436250  |
| 10               | 6                | 0              | -1.139728               | -0.276518 | -2.023691 |
| 11               | 6                | 0              | -1.807905               | -1.522449 | -1.481417 |
| 12               | 6                | 0              | -2.205417               | -1.599147 | -0.158533 |
| 13               | 6                | 0              | -2.074492               | -2.624817 | -2.315925 |
| 14               | 6                | 0              | -2.850258               | -2.745014 | 0.331610  |
| 15               | 6                | 0              | -2.719445               | -3.756500 | -1.849196 |
| 16               | 6                | 0              | -3.126238               | -3.848653 | -0.513605 |
| 17               | 8                | 0              | -3.745296               | -4.975018 | -0.125008 |
| 18               | 6                | 0              | 0.464096                | 1.510731  | -1.592710 |
| 19               | 6                | 0              | -0.515246               | 2.574674  | -1.149779 |
| 20               | 6                | 0              | -0.779311               | 2.768089  | 0.216902  |
| 21               | 6                | 0              | -1.147812               | 3.396855  | -2.081112 |
| 22               | 6                | 0              | -1.662014               | 3.758168  | 0.631302  |
| 23               | 6                | 0              | -2.033169               | 4.398066  | -1.670679 |
| 24               | 6                | 0              | -2.293925               | 4.580995  | -0.322099 |
| 25               | 8                | 0              | -3.163167               | 5.563748  | 0.075778  |
| 26               | 8                | 0              | -1.995532               | 4.038964  | 1.929253  |
| 27               | 6                | 0              | -1.392733               | 3.266432  | 2.976184  |
| 28               | 1                | 0              | 0.757632                | -1.823958 | -1.409051 |
| 29               | 1                | 0              | 1.598074                | -0.696951 | -2.471571 |
| 30               | 1                | 0              | 3.850253                | -0.648117 | -1.869238 |
| 31               | 1                | 0              | 0.877439                | -0.732587 | 1.251579  |
| 32               | 1                | 0              | 2.663081                | -0.613862 | 2.964529  |
| 33               | 1                | 0              | -1.852597               | 0.550504  | -1.982475 |

|    |   |   |           |           |           |
|----|---|---|-----------|-----------|-----------|
| 34 | 1 | 0 | -0.894838 | -0.431013 | -3.086788 |
| 35 | 1 | 0 | -2.027493 | -0.776659 | 0.520250  |
| 36 | 1 | 0 | -1.767451 | -2.587668 | -3.355862 |
| 37 | 1 | 0 | -2.919972 | -4.597383 | -2.502488 |
| 38 | 1 | 0 | -3.972090 | -4.892418 | 0.825082  |
| 39 | 1 | 0 | 1.426261  | 1.682810  | -1.100673 |
| 40 | 1 | 0 | 0.639107  | 1.608460  | -2.676295 |
| 41 | 1 | 0 | -0.287569 | 2.141296  | 0.949785  |
| 42 | 1 | 0 | -0.953327 | 3.261369  | -3.139655 |
| 43 | 1 | 0 | -2.526285 | 5.038792  | -2.393543 |
| 44 | 1 | 0 | -3.228305 | 5.551979  | 1.042715  |
| 45 | 1 | 0 | -0.306095 | 3.388199  | 2.972473  |
| 46 | 1 | 0 | -1.802356 | 3.660135  | 3.905135  |
| 47 | 1 | 0 | -1.652313 | 2.208802  | 2.878774  |
| 48 | 7 | 0 | 5.970274  | -0.574220 | -0.342600 |
| 49 | 8 | 0 | 6.811945  | -1.191454 | 0.301722  |
| 50 | 8 | 0 | 6.222326  | 0.056314  | -1.368421 |
| 51 | 7 | 0 | -3.226335 | -2.765971 | 1.719660  |
| 52 | 8 | 0 | -2.967893 | -1.803021 | 2.436869  |
| 53 | 8 | 0 | -3.810022 | -3.774908 | 2.166818  |

5. ARO./X' (0,2)

Sum of electronic and thermal Enthalpies= -1616.238627  
 Frequencies -- 15.8930 16.6321 17.6834

| Center<br>Number | Atomic<br>Number | Atomic<br>Type | Coordinates (Angstroms) |           |           |
|------------------|------------------|----------------|-------------------------|-----------|-----------|
|                  |                  |                | X                       | Y         | Z         |
| 1                | 7                | 0              | -0.040392               | 0.032180  | -1.369402 |
| 2                | 6                | 0              | 0.956755                | -1.023885 | -1.633865 |
| 3                | 6                | 0              | 2.073051                | -1.050939 | -0.614856 |
| 4                | 6                | 0              | 3.382746                | -0.811970 | -0.977854 |
| 5                | 6                | 0              | 1.800547                | -1.345723 | 0.738852  |
| 6                | 6                | 0              | 4.413733                | -0.855748 | -0.021093 |
| 7                | 6                | 0              | 2.801112                | -1.390191 | 1.688542  |
| 8                | 6                | 0              | 4.135792                | -1.142185 | 1.336451  |
| 9                | 8                | 0              | 5.056076                | -1.194462 | 2.310257  |
| 10               | 6                | 0              | -1.278953               | -0.219617 | -2.104915 |
| 11               | 6                | 0              | -2.102264               | -1.337291 | -1.528728 |
| 12               | 6                | 0              | -2.239529               | -1.469182 | -0.125314 |
| 13               | 6                | 0              | -2.788771               | -2.239318 | -2.372687 |
| 14               | 6                | 0              | -3.034384               | -2.447527 | 0.405198  |
| 15               | 6                | 0              | -3.574862               | -3.236209 | -1.856569 |
| 16               | 6                | 0              | -3.747804               | -3.419249 | -0.426357 |
| 17               | 8                | 0              | -4.420290               | -4.363793 | 0.031271  |
| 18               | 6                | 0              | 0.502329                | 1.373062  | -1.670538 |
| 19               | 6                | 0              | -0.345036               | 2.505859  | -1.134867 |
| 20               | 6                | 0              | -0.497985               | 2.674505  | 0.251756  |
| 21               | 6                | 0              | -0.964280               | 3.410201  | -1.996363 |
| 22               | 6                | 0              | -1.258911               | 3.722318  | 0.755676  |
| 23               | 6                | 0              | -1.728680               | 4.469013  | -1.496027 |
| 24               | 6                | 0              | -1.880165               | 4.627960  | -0.128031 |
| 25               | 8                | 0              | -2.632226               | 5.667440  | 0.355533  |

|    |   |   |           |           |           |
|----|---|---|-----------|-----------|-----------|
| 26 | 8 | 0 | -1.476590 | 3.984795  | 2.081534  |
| 27 | 6 | 0 | -0.874387 | 3.126085  | 3.059730  |
| 28 | 1 | 0 | 0.436539  | -1.985144 | -1.603107 |
| 29 | 1 | 0 | 1.383429  | -0.922838 | -2.643949 |
| 30 | 1 | 0 | 3.638826  | -0.585036 | -2.004283 |
| 31 | 1 | 0 | 0.779345  | -1.546967 | 1.043525  |
| 32 | 1 | 0 | 2.583281  | -1.620371 | 2.724756  |
| 33 | 1 | 0 | 5.933581  | -1.001125 | 1.915754  |
| 34 | 1 | 0 | -1.893125 | 0.689572  | -2.055965 |
| 35 | 1 | 0 | -1.099503 | -0.411140 | -3.174723 |
| 36 | 1 | 0 | -1.728311 | -0.773392 | 0.526697  |
| 37 | 1 | 0 | -2.678243 | -2.139410 | -3.446936 |
| 38 | 1 | 0 | -4.086018 | -3.945028 | -2.497905 |
| 39 | 1 | 0 | 1.495702  | 1.424367  | -1.218349 |
| 40 | 1 | 0 | 0.638410  | 1.502899  | -2.756292 |
| 41 | 1 | 0 | -0.014864 | 1.982041  | 0.929335  |
| 42 | 1 | 0 | -0.852894 | 3.295739  | -3.069298 |
| 43 | 1 | 0 | -2.211591 | 5.174067  | -2.163761 |
| 44 | 1 | 0 | -2.636208 | 5.631069  | 1.323956  |
| 45 | 1 | 0 | 0.215906  | 3.151802  | 2.980851  |
| 46 | 1 | 0 | -1.181620 | 3.521189  | 4.026799  |
| 47 | 1 | 0 | -1.234099 | 2.099373  | 2.950565  |
| 48 | 7 | 0 | 5.755915  | -0.598861 | -0.458889 |
| 49 | 8 | 0 | 5.977398  | -0.358531 | -1.643300 |
| 50 | 8 | 0 | 6.677730  | -0.625508 | 0.384714  |
| 51 | 7 | 0 | -3.160401 | -2.508270 | 1.857349  |
| 52 | 8 | 0 | -4.245723 | -2.821150 | 2.335653  |
| 53 | 8 | 0 | -2.170715 | -2.230895 | 2.534346  |

6. ARO./Y (0,2)

Sum of electronic and thermal Enthalpies= -1616.255846  
 Frequencies -- 12.2022 16.2814 16.7574

| Center<br>Number | Atomic<br>Number | Atomic<br>Type | Coordinates (Angstroms) |           |           |
|------------------|------------------|----------------|-------------------------|-----------|-----------|
|                  |                  |                | X                       | Y         | Z         |
| 1                | 7                | 0              | 0.085092                | 0.057038  | -1.269600 |
| 2                | 6                | 0              | 0.955557                | -1.120458 | -1.436363 |
| 3                | 6                | 0              | 2.054865                | -1.197472 | -0.401292 |
| 4                | 6                | 0              | 3.385494                | -1.172061 | -0.766625 |
| 5                | 6                | 0              | 1.744465                | -1.323721 | 0.970347  |
| 6                | 6                | 0              | 4.400495                | -1.266611 | 0.203460  |
| 7                | 6                | 0              | 2.729186                | -1.412957 | 1.933549  |
| 8                | 6                | 0              | 4.085494                | -1.383758 | 1.577998  |
| 9                | 8                | 0              | 4.989492                | -1.470743 | 2.564575  |
| 10               | 6                | 0              | -1.145553               | -0.077250 | -2.071801 |
| 11               | 6                | 0              | -2.097569               | -1.130404 | -1.546579 |
| 12               | 6                | 0              | -2.628323               | -1.033001 | -0.272990 |
| 13               | 6                | 0              | -2.492723               | -2.220392 | -2.345105 |
| 14               | 6                | 0              | -3.529764               | -1.995723 | 0.205069  |
| 15               | 6                | 0              | -3.386364               | -3.173897 | -1.889988 |
| 16               | 6                | 0              | -3.930232               | -3.088662 | -0.603717 |
| 17               | 8                | 0              | -4.790377               | -4.046617 | -0.223251 |

|    |   |   |           |           |           |
|----|---|---|-----------|-----------|-----------|
| 18 | 6 | 0 | 0.792413  | 1.295089  | -1.614052 |
| 19 | 6 | 0 | 0.132542  | 2.553807  | -1.102246 |
| 20 | 6 | 0 | -0.452372 | 2.595568  | 0.168629  |
| 21 | 6 | 0 | 0.164290  | 3.726936  | -1.905776 |
| 22 | 6 | 0 | -1.001577 | 3.775522  | 0.651078  |
| 23 | 6 | 0 | -0.366801 | 4.905130  | -1.457795 |
| 24 | 6 | 0 | -0.981604 | 5.004146  | -0.157663 |
| 25 | 8 | 0 | -1.478780 | 6.075079  | 0.276205  |
| 26 | 8 | 0 | -1.579021 | 3.923637  | 1.849269  |
| 27 | 6 | 0 | -1.655636 | 2.796705  | 2.743498  |
| 28 | 1 | 0 | 0.324723  | -2.008029 | -1.340207 |
| 29 | 1 | 0 | 1.399264  | -1.150829 | -2.444262 |
| 30 | 1 | 0 | 3.670844  | -1.078386 | -1.806063 |
| 31 | 1 | 0 | 0.705493  | -1.355906 | 1.278862  |
| 32 | 1 | 0 | 2.481203  | -1.512350 | 2.983717  |
| 33 | 1 | 0 | 5.885744  | -1.436668 | 2.166835  |
| 34 | 1 | 0 | -1.652658 | 0.891000  | -2.058174 |
| 35 | 1 | 0 | -0.908947 | -0.296983 | -3.125092 |
| 36 | 1 | 0 | -2.358039 | -0.211589 | 0.375907  |
| 37 | 1 | 0 | -2.087389 | -2.317289 | -3.346831 |
| 38 | 1 | 0 | -3.682457 | -4.008380 | -2.514580 |
| 39 | 1 | 0 | -5.086720 | -3.852151 | 0.690461  |
| 40 | 1 | 0 | 1.792723  | 1.246102  | -1.168091 |
| 41 | 1 | 0 | 0.945574  | 1.384314  | -2.701759 |
| 42 | 1 | 0 | -0.467382 | 1.695921  | 0.767814  |
| 43 | 1 | 0 | 0.616806  | 3.673947  | -2.890364 |
| 44 | 1 | 0 | -0.350327 | 5.803042  | -2.065705 |
| 45 | 1 | 0 | -0.654281 | 2.440089  | 2.994815  |
| 46 | 1 | 0 | -2.152213 | 3.171726  | 3.636054  |
| 47 | 1 | 0 | -2.246130 | 1.993316  | 2.297717  |
| 48 | 7 | 0 | 5.765283  | -1.236656 | -0.239361 |
| 49 | 8 | 0 | 6.016834  | -1.141046 | -1.438382 |
| 50 | 8 | 0 | 6.675389  | -1.309133 | 0.613935  |
| 51 | 7 | 0 | -4.039720 | -1.837528 | 1.540935  |
| 52 | 8 | 0 | -4.847713 | -2.682899 | 1.977776  |
| 53 | 8 | 0 | -3.674338 | -0.884539 | 2.224287  |

7. Radical Cation (1,2)

Sum of electronic and thermal Enthalpies= -1616.679469  
 Frequencies -- 14.1887 20.6651 21.9661

| Center<br>Number | Atomic<br>Number | Atomic<br>Type | Coordinates (Angstroms) |           |           |
|------------------|------------------|----------------|-------------------------|-----------|-----------|
|                  |                  |                | X                       | Y         | Z         |
| 1                | 7                | 0              | -0.143965               | -0.273677 | 2.364658  |
| 2                | 6                | 0              | -1.116957               | -1.352405 | 2.162134  |
| 3                | 6                | 0              | -1.934051               | -1.228004 | 0.893702  |
| 4                | 6                | 0              | -3.264699               | -0.863284 | 0.944609  |
| 5                | 6                | 0              | -1.362451               | -1.542005 | -0.356600 |
| 6                | 6                | 0              | -4.028505               | -0.803978 | -0.231169 |
| 7                | 6                | 0              | -2.104804               | -1.487604 | -1.517604 |
| 8                | 6                | 0              | -3.457661               | -1.115499 | -1.488920 |
| 9                | 8                | 0              | -4.114984               | -1.083071 | -2.652937 |

|    |   |   |           |           |           |
|----|---|---|-----------|-----------|-----------|
| 10 | 6 | 0 | 1.228854  | -0.616817 | 2.741051  |
| 11 | 6 | 0 | 1.970683  | -1.400587 | 1.674520  |
| 12 | 6 | 0 | 2.342846  | -0.791209 | 0.489944  |
| 13 | 6 | 0 | 2.330115  | -2.745545 | 1.883292  |
| 14 | 6 | 0 | 3.060389  | -1.502774 | -0.479146 |
| 15 | 6 | 0 | 3.045561  | -3.453502 | 0.936757  |
| 16 | 6 | 0 | 3.431997  | -2.853754 | -0.270049 |
| 17 | 8 | 0 | 4.122640  | -3.597616 | -1.141538 |
| 18 | 6 | 0 | -0.605981 | 1.111726  | 2.488603  |
| 19 | 6 | 0 | 0.177922  | 2.080643  | 1.627820  |
| 20 | 6 | 0 | 0.012321  | 2.063753  | 0.232130  |
| 21 | 6 | 0 | 1.042908  | 3.004401  | 2.210968  |
| 22 | 6 | 0 | 0.711321  | 2.964236  | -0.561460 |
| 23 | 6 | 0 | 1.740615  | 3.914747  | 1.416255  |
| 24 | 6 | 0 | 1.583914  | 3.896668  | 0.037472  |
| 25 | 8 | 0 | 2.276822  | 4.786379  | -0.729727 |
| 26 | 8 | 0 | 0.643766  | 3.049139  | -1.921458 |
| 27 | 6 | 0 | -0.213469 | 2.140908  | -2.627978 |
| 28 | 1 | 0 | -0.578775 | -2.298287 | 2.186144  |
| 29 | 1 | 0 | -1.781295 | -1.315295 | 3.035199  |
| 30 | 1 | 0 | -3.742052 | -0.629284 | 1.886821  |
| 31 | 1 | 0 | -0.321197 | -1.839843 | -0.407125 |
| 32 | 1 | 0 | -1.665620 | -1.734523 | -2.476627 |
| 33 | 1 | 0 | -5.044225 | -0.819738 | -2.481373 |
| 34 | 1 | 0 | 1.750892  | 0.305595  | 2.988077  |
| 35 | 1 | 0 | 1.147370  | -1.222955 | 3.651724  |
| 36 | 1 | 0 | 2.095040  | 0.241926  | 0.290898  |
| 37 | 1 | 0 | 2.051765  | -3.236570 | 2.809168  |
| 38 | 1 | 0 | 3.328124  | -4.485613 | 1.105680  |
| 39 | 1 | 0 | 4.337148  | -3.045833 | -1.923738 |
| 40 | 1 | 0 | -1.669395 | 1.131865  | 2.255276  |
| 41 | 1 | 0 | -0.482387 | 1.372110  | 3.547919  |
| 42 | 1 | 0 | -0.661252 | 1.348035  | -0.220480 |
| 43 | 1 | 0 | 1.170183  | 3.026585  | 3.287236  |
| 44 | 1 | 0 | 2.408783  | 4.644627  | 1.859136  |
| 45 | 1 | 0 | 2.060112  | 4.639432  | -1.663535 |
| 46 | 1 | 0 | -1.255356 | 2.278448  | -2.326521 |
| 47 | 1 | 0 | -0.100052 | 2.390456  | -3.681604 |
| 48 | 1 | 0 | 0.094292  | 1.106050  | -2.458828 |
| 49 | 7 | 0 | -5.414182 | -0.426363 | -0.117442 |
| 50 | 8 | 0 | -5.883420 | -0.164271 | 0.985213  |
| 51 | 8 | 0 | -6.103810 | -0.375078 | -1.154710 |
| 52 | 7 | 0 | 3.405242  | -0.815485 | -1.699470 |
| 53 | 8 | 0 | 3.023647  | 0.336456  | -1.876052 |
| 54 | 8 | 0 | 4.083214  | -1.423089 | -2.550747 |

#### S1.4-Compound 4

ArOH (0,1)

Sum of electronic and thermal Enthalpies= -2127.014323

Frequencies -- 14.7803 15.7337 20.6508

---

| Center<br>Number | Atomic<br>Number | Atomic<br>Type | Coordinates (Angstroms) |   |   |
|------------------|------------------|----------------|-------------------------|---|---|
|                  |                  |                | X                       | Y | Z |



---

|    |    |   |           |           |           |
|----|----|---|-----------|-----------|-----------|
| 1  | 7  | 0 | 0.025944  | -0.190715 | -1.278074 |
| 2  | 6  | 0 | 1.162870  | -1.104797 | -1.493185 |
| 3  | 6  | 0 | 2.308117  | -0.886762 | -0.527284 |
| 4  | 6  | 0 | 3.557119  | -0.464913 | -0.981985 |
| 5  | 6  | 0 | 2.150597  | -1.130535 | 0.844296  |
| 6  | 6  | 0 | 4.610630  | -0.289370 | -0.088557 |
| 7  | 6  | 0 | 3.202011  | -0.954636 | 1.732683  |
| 8  | 6  | 0 | 4.453568  | -0.527912 | 1.278363  |
| 9  | 8  | 0 | 5.447063  | -0.372072 | 2.200284  |
| 10 | 6  | 0 | -1.175564 | -0.671787 | -1.984412 |
| 11 | 6  | 0 | -1.782553 | -1.917156 | -1.373747 |
| 12 | 6  | 0 | -2.310298 | -1.882676 | -0.079561 |
| 13 | 6  | 0 | -1.855906 | -3.118855 | -2.085134 |
| 14 | 6  | 0 | -2.880307 | -3.020565 | 0.475041  |
| 15 | 6  | 0 | -2.430319 | -4.257171 | -1.528070 |
| 16 | 6  | 0 | -2.949979 | -4.225472 | -0.234367 |
| 17 | 8  | 0 | -3.498408 | -5.369103 | 0.267939  |
| 18 | 6  | 0 | 0.367825  | 1.183260  | -1.695951 |
| 19 | 6  | 0 | -0.607716 | 2.233940  | -1.209098 |
| 20 | 6  | 0 | -0.747204 | 2.477307  | 0.167886  |
| 21 | 6  | 0 | -1.359252 | 2.991801  | -2.105354 |
| 22 | 6  | 0 | -1.624539 | 3.452074  | 0.627925  |
| 23 | 6  | 0 | -2.242364 | 3.976223  | -1.649515 |
| 24 | 6  | 0 | -2.380055 | 4.207119  | -0.290436 |
| 25 | 8  | 0 | -3.250740 | 5.171147  | 0.152442  |
| 26 | 8  | 0 | -1.841306 | 3.777952  | 1.941003  |
| 27 | 6  | 0 | -1.128537 | 3.057217  | 2.955127  |
| 28 | 1  | 0 | 0.790084  | -2.123724 | -1.363406 |
| 29 | 1  | 0 | 1.537843  | -1.032443 | -2.527642 |
| 30 | 1  | 0 | 3.716938  | -0.269454 | -2.036205 |
| 31 | 1  | 0 | 1.192070  | -1.468153 | 1.222718  |
| 32 | 1  | 0 | 3.077989  | -1.149428 | 2.792221  |
| 33 | 1  | 0 | 6.271338  | -0.090480 | 1.776956  |
| 34 | 1  | 0 | -1.914420 | 0.132393  | -1.950927 |
| 35 | 1  | 0 | -0.959729 | -0.860883 | -3.049280 |
| 36 | 1  | 0 | -2.279362 | -0.967195 | 0.499237  |
| 37 | 1  | 0 | -1.455887 | -3.169545 | -3.092285 |
| 38 | 1  | 0 | -2.480839 | -5.187059 | -2.083462 |
| 39 | 1  | 0 | -3.799306 | -5.233790 | 1.178582  |
| 40 | 1  | 0 | 1.358108  | 1.405766  | -1.290462 |
| 41 | 1  | 0 | 0.452562  | 1.248683  | -2.793598 |
| 42 | 1  | 0 | -0.161950 | 1.899401  | 0.871784  |
| 43 | 1  | 0 | -1.262393 | 2.818622  | -3.171907 |
| 44 | 1  | 0 | -2.829877 | 4.565380  | -2.345281 |
| 45 | 1  | 0 | -3.225584 | 5.193999  | 1.121004  |
| 46 | 1  | 0 | -0.049455 | 3.197557  | 2.847458  |
| 47 | 1  | 0 | -1.459698 | 3.478691  | 3.903108  |
| 48 | 1  | 0 | -1.372908 | 1.992027  | 2.920331  |
| 49 | 17 | 0 | -3.549294 | -2.955557 | 2.111442  |
| 50 | 17 | 0 | 6.181932  | 0.253203  | -0.691658 |

---

1. ArO-/X (-1,1)

Sum of electronic and thermal Enthalpies= -2126.556199  
 Frequencies -- 10.8959 16.2465 18.5970

| Center<br>Number | Atomic<br>Number | Atomic<br>Type | Coordinates (Angstroms) |           |           |
|------------------|------------------|----------------|-------------------------|-----------|-----------|
|                  |                  |                | X                       | Y         | Z         |
| 1                | 7                | 0              | 0.000519                | -0.262151 | -1.193733 |
| 2                | 6                | 0              | 0.799443                | -1.495376 | -1.370933 |
| 3                | 6                | 0              | 1.984769                | -1.605976 | -0.439514 |
| 4                | 6                | 0              | 3.295360                | -1.538211 | -0.920916 |
| 5                | 6                | 0              | 1.820104                | -1.799104 | 0.941482  |
| 6                | 6                | 0              | 4.383347                | -1.648885 | -0.062099 |
| 7                | 6                | 0              | 2.907445                | -1.905776 | 1.795329  |
| 8                | 6                | 0              | 4.265259                | -1.831612 | 1.349247  |
| 9                | 8                | 0              | 5.266637                | -1.925696 | 2.164281  |
| 10               | 6                | 0              | -1.282626               | -0.363266 | -1.909067 |
| 11               | 6                | 0              | -2.257243               | -1.340515 | -1.285387 |
| 12               | 6                | 0              | -2.713674               | -1.147463 | 0.021759  |
| 13               | 6                | 0              | -2.750831               | -2.435350 | -2.001803 |
| 14               | 6                | 0              | -3.626162               | -2.030685 | 0.582801  |
| 15               | 6                | 0              | -3.669992               | -3.315650 | -1.439230 |
| 16               | 6                | 0              | -4.122013               | -3.126227 | -0.133724 |
| 17               | 8                | 0              | -5.021083               | -4.019458 | 0.373256  |
| 18               | 6                | 0              | 0.753743                | 0.925957  | -1.635938 |
| 19               | 6                | 0              | 0.149942                | 2.239610  | -1.185183 |
| 20               | 6                | 0              | 0.083703                | 2.547690  | 0.184385  |
| 21               | 6                | 0              | -0.322941               | 3.172104  | -2.106902 |
| 22               | 6                | 0              | -0.450412               | 3.757358  | 0.611991  |
| 23               | 6                | 0              | -0.859291               | 4.392950  | -1.683857 |
| 24               | 6                | 0              | -0.927541               | 4.687637  | -0.331925 |
| 25               | 8                | 0              | -1.459111               | 5.884856  | 0.079071  |
| 26               | 8                | 0              | -0.564570               | 4.165512  | 1.915440  |
| 27               | 6                | 0              | -0.113224               | 3.284728  | 2.953330  |
| 28               | 1                | 0              | 0.123074                | -2.336014 | -1.194752 |
| 29               | 1                | 0              | 1.145689                | -1.582745 | -2.415406 |
| 30               | 1                | 0              | 3.471616                | -1.396034 | -1.982376 |
| 31               | 1                | 0              | 0.817208                | -1.868713 | 1.354175  |
| 32               | 1                | 0              | 2.749976                | -2.057416 | 2.859816  |
| 33               | 1                | 0              | -1.735970               | 0.631352  | -1.907699 |
| 34               | 1                | 0              | -1.127263               | -0.638750 | -2.966102 |
| 35               | 1                | 0              | -2.358730               | -0.307274 | 0.606387  |
| 36               | 1                | 0              | -2.411047               | -2.606443 | -3.017815 |
| 37               | 1                | 0              | -4.046859               | -4.164086 | -1.999458 |
| 38               | 1                | 0              | -5.256903               | -3.789587 | 1.284182  |
| 39               | 1                | 0              | 1.760813                | 0.838376  | -1.221136 |
| 40               | 1                | 0              | 0.862400                | 0.936569  | -2.734002 |
| 41               | 1                | 0              | 0.456708                | 1.833971  | 0.907847  |
| 42               | 1                | 0              | -0.277478               | 2.952089  | -3.168278 |
| 43               | 1                | 0              | -1.230218               | 5.118504  | -2.399703 |
| 44               | 1                | 0              | -1.431115               | 5.922981  | 1.046999  |
| 45               | 1                | 0              | 0.957028                | 3.083426  | 2.855587  |
| 46               | 1                | 0              | -0.303347               | 3.810100  | 3.888133  |
| 47               | 1                | 0              | -0.673699               | 2.346027  | 2.938139  |
| 48               | 17               | 0              | -4.190606               | -1.769077 | 2.239065  |

49 17 0 6.015485 -1.550540 -0.771796

2. ARO-/X' (-1,1)

Sum of electronic and thermal Enthalpies= -2126.555955

Frequencies -- 14.5251 18.6568 20.9314

Center Atomic Atomic Coordinates (Angstroms)  
Number Number Type X Y Z

|    |   |   |           |           |           |
|----|---|---|-----------|-----------|-----------|
| 1  | 7 | 0 | 0.129603  | -0.133084 | -1.322299 |
| 2  | 6 | 0 | 1.226971  | 0.797207  | -1.639029 |
| 3  | 6 | 0 | 1.290753  | 1.997807  | -0.718895 |
| 4  | 6 | 0 | 1.078655  | 3.287131  | -1.206552 |
| 5  | 6 | 0 | 1.591466  | 1.846421  | 0.642140  |
| 6  | 6 | 0 | 1.161788  | 4.386007  | -0.355168 |
| 7  | 6 | 0 | 1.674051  | 2.943114  | 1.488379  |
| 8  | 6 | 0 | 1.458300  | 4.235600  | 1.000951  |
| 9  | 8 | 0 | 1.552555  | 5.273454  | 1.882117  |
| 10 | 6 | 0 | 0.329461  | -1.435432 | -1.996472 |
| 11 | 6 | 0 | 1.482860  | -2.249289 | -1.455424 |
| 12 | 6 | 0 | 1.421996  | -2.818612 | -0.176486 |
| 13 | 6 | 0 | 2.640322  | -2.490480 | -2.206955 |
| 14 | 6 | 0 | 2.471870  | -3.578930 | 0.316937  |
| 15 | 6 | 0 | 3.688449  | -3.256754 | -1.711113 |
| 16 | 6 | 0 | 3.672909  | -3.850747 | -0.412991 |
| 17 | 8 | 0 | 4.653282  | -4.562944 | 0.040272  |
| 18 | 6 | 0 | -1.174986 | 0.451264  | -1.686147 |
| 19 | 6 | 0 | -2.363593 | -0.279616 | -1.096859 |
| 20 | 6 | 0 | -2.535321 | -0.331138 | 0.296857  |
| 21 | 6 | 0 | -3.316912 | -0.884641 | -1.913955 |
| 22 | 6 | 0 | -3.632646 | -0.979986 | 0.850451  |
| 23 | 6 | 0 | -4.425251 | -1.537206 | -1.363774 |
| 24 | 6 | 0 | -4.585450 | -1.589692 | 0.011323  |
| 25 | 8 | 0 | -5.672260 | -2.234859 | 0.547493  |
| 26 | 8 | 0 | -3.904299 | -1.092145 | 2.188998  |
| 27 | 6 | 0 | -2.981968 | -0.522671 | 3.127635  |
| 28 | 1 | 0 | 2.161019  | 0.238320  | -1.545250 |
| 29 | 1 | 0 | 1.165315  | 1.141896  | -2.685267 |
| 30 | 1 | 0 | 0.846476  | 3.443280  | -2.253893 |
| 31 | 1 | 0 | 1.769640  | 0.855322  | 1.044595  |
| 32 | 1 | 0 | 1.913375  | 2.822365  | 2.539147  |
| 33 | 1 | 0 | 1.408252  | 6.120310  | 1.435213  |
| 34 | 1 | 0 | -0.599709 | -1.997407 | -1.873674 |
| 35 | 1 | 0 | 0.468108  | -1.289105 | -3.081826 |
| 36 | 1 | 0 | 0.541839  | -2.667247 | 0.439861  |
| 37 | 1 | 0 | 2.721435  | -2.069884 | -3.206040 |
| 38 | 1 | 0 | 4.572675  | -3.426555 | -2.319348 |
| 39 | 1 | 0 | -1.181092 | 1.482341  | -1.322741 |
| 40 | 1 | 0 | -1.290116 | 0.501868  | -2.782335 |
| 41 | 1 | 0 | -1.803614 | 0.140788  | 0.940099  |
| 42 | 1 | 0 | -3.200566 | -0.854211 | -2.992142 |
| 43 | 1 | 0 | -5.166008 | -2.011814 | -1.998173 |
| 44 | 1 | 0 | -5.619867 | -2.184075 | 1.513894  |

|    |    |   |           |           |           |
|----|----|---|-----------|-----------|-----------|
| 45 | 1  | 0 | -2.904704 | 0.559463  | 2.990597  |
| 46 | 1  | 0 | -3.393901 | -0.738327 | 4.112429  |
| 47 | 1  | 0 | -1.995068 | -0.983529 | 3.032245  |
| 48 | 17 | 0 | 0.880838  | 6.009787  | -0.998507 |
| 49 | 17 | 0 | 2.309516  | -4.269001 | 1.951959  |

3. ARO-/Y (-1,1)

Sum of electronic and thermal Enthalpies= -2126.548499  
 Frequencies -- 13.3214 16.8028 21.6722

| Center Number | Atomic Number | Atomic Type | Coordinates (Angstroms) |   |   |
|---------------|---------------|-------------|-------------------------|---|---|
|               |               |             | X                       | Y | Z |

|    |   |   |           |           |           |
|----|---|---|-----------|-----------|-----------|
| 1  | 7 | 0 | 0.038389  | -0.079890 | -1.229827 |
| 2  | 6 | 0 | 1.445493  | -0.449447 | -1.464260 |
| 3  | 6 | 0 | 2.418247  | 0.223100  | -0.518432 |
| 4  | 6 | 0 | 3.392753  | 1.098437  | -0.996966 |
| 5  | 6 | 0 | 2.384586  | -0.041012 | 0.857915  |
| 6  | 6 | 0 | 4.299335  | 1.691513  | -0.122086 |
| 7  | 6 | 0 | 3.288118  | 0.552581  | 1.728020  |
| 8  | 6 | 0 | 4.262869  | 1.433262  | 1.249726  |
| 9  | 8 | 0 | 5.122280  | 1.985470  | 2.154634  |
| 10 | 6 | 0 | -0.868659 | -1.016325 | -1.916174 |
| 11 | 6 | 0 | -0.901265 | -2.397456 | -1.296806 |
| 12 | 6 | 0 | -1.390336 | -2.577232 | 0.000741  |
| 13 | 6 | 0 | -0.469382 | -3.525729 | -2.001358 |
| 14 | 6 | 0 | -1.430917 | -3.845138 | 0.564754  |
| 15 | 6 | 0 | -0.513713 | -4.795899 | -1.434712 |
| 16 | 6 | 0 | -0.993555 | -4.974334 | -0.137663 |
| 17 | 8 | 0 | -1.011693 | -6.239130 | 0.374647  |
| 18 | 6 | 0 | -0.217215 | 1.315133  | -1.658741 |
| 19 | 6 | 0 | -1.544864 | 1.879337  | -1.208530 |
| 20 | 6 | 0 | -1.786582 | 2.140119  | 0.156541  |
| 21 | 6 | 0 | -2.557225 | 2.185854  | -2.115525 |
| 22 | 6 | 0 | -2.991464 | 2.676549  | 0.587311  |
| 23 | 6 | 0 | -3.773589 | 2.729603  | -1.689814 |
| 24 | 6 | 0 | -4.054175 | 2.999622  | -0.329750 |
| 25 | 8 | 0 | -5.183049 | 3.508988  | 0.083103  |
| 26 | 8 | 0 | -3.278379 | 2.954557  | 1.911200  |
| 27 | 6 | 0 | -2.281492 | 2.675093  | 2.892970  |
| 28 | 1 | 0 | 1.527149  | -1.531044 | -1.330190 |
| 29 | 1 | 0 | 1.742335  | -0.235465 | -2.504967 |
| 30 | 1 | 0 | 3.450462  | 1.325021  | -2.055477 |
| 31 | 1 | 0 | 1.642103  | -0.724334 | 1.254994  |
| 32 | 1 | 0 | 3.261160  | 0.342830  | 2.791618  |
| 33 | 1 | 0 | 5.754713  | 2.573575  | 1.716596  |
| 34 | 1 | 0 | -1.870871 | -0.584230 | -1.869879 |
| 35 | 1 | 0 | -0.610162 | -1.107711 | -2.984935 |
| 36 | 1 | 0 | -1.742751 | -1.728165 | 0.574420  |
| 37 | 1 | 0 | -0.089147 | -3.412435 | -3.011131 |
| 38 | 1 | 0 | -0.173758 | -5.666067 | -1.985171 |
| 39 | 1 | 0 | -1.338885 | -6.234867 | 1.286253  |
| 40 | 1 | 0 | 0.594850  | 1.921049  | -1.247445 |

|    |    |   |           |           |           |
|----|----|---|-----------|-----------|-----------|
| 41 | 1  | 0 | -0.144158 | 1.394949  | -2.757363 |
| 42 | 1  | 0 | -1.006884 | 1.916610  | 0.875387  |
| 43 | 1  | 0 | -2.400543 | 2.001337  | -3.175300 |
| 44 | 1  | 0 | -4.548241 | 2.961838  | -2.416111 |
| 45 | 1  | 0 | -1.371524 | 3.258315  | 2.716377  |
| 46 | 1  | 0 | -2.715161 | 2.965927  | 3.850032  |
| 47 | 1  | 0 | -2.032263 | 1.609006  | 2.917989  |
| 48 | 17 | 0 | 5.521912  | 2.801731  | -0.755855 |
| 49 | 17 | 0 | -2.059998 | -4.053061 | 2.205141  |

4. ARO./X (0,2)

Sum of electronic and thermal Enthalpies= -2126.386138

Frequencies -- 15.7943 17.2134 22.5400

Center Atomic Atomic Coordinates (Angstroms)  
Number Number Type X Y Z

|    |   |   |           |           |           |
|----|---|---|-----------|-----------|-----------|
| 1  | 7 | 0 | 0.101527  | -0.144154 | -1.270804 |
| 2  | 6 | 0 | 1.335113  | -0.912180 | -1.480332 |
| 3  | 6 | 0 | 2.408111  | -0.595800 | -0.470418 |
| 4  | 6 | 0 | 3.709529  | -0.267546 | -0.896188 |
| 5  | 6 | 0 | 2.127059  | -0.670495 | 0.920351  |
| 6  | 6 | 0 | 4.699694  | -0.016158 | 0.023652  |
| 7  | 6 | 0 | 3.098356  | -0.426138 | 1.848859  |
| 8  | 6 | 0 | 4.452153  | -0.078987 | 1.462731  |
| 9  | 8 | 0 | 5.344670  | 0.146688  | 2.311119  |
| 10 | 6 | 0 | -1.032711 | -0.756934 | -1.986316 |
| 11 | 6 | 0 | -1.489345 | -2.070125 | -1.388190 |
| 12 | 6 | 0 | -1.974565 | -2.119789 | -0.077944 |
| 13 | 6 | 0 | -1.467573 | -3.255039 | -2.130614 |
| 14 | 6 | 0 | -2.413961 | -3.321154 | 0.461463  |
| 15 | 6 | 0 | -1.915470 | -4.456183 | -1.590151 |
| 16 | 6 | 0 | -2.396866 | -4.507673 | -0.282194 |
| 17 | 8 | 0 | -2.823422 | -5.711264 | 0.197110  |
| 18 | 6 | 0 | 0.292434  | 1.265125  | -1.676081 |
| 19 | 6 | 0 | -0.804762 | 2.194203  | -1.204281 |
| 20 | 6 | 0 | -0.999045 | 2.412625  | 0.170163  |
| 21 | 6 | 0 | -1.617289 | 2.868006  | -2.114430 |
| 22 | 6 | 0 | -1.988598 | 3.281488  | 0.614116  |
| 23 | 6 | 0 | -2.612127 | 3.747184  | -1.674845 |
| 24 | 6 | 0 | -2.801645 | 3.955784  | -0.318245 |
| 25 | 8 | 0 | -3.779156 | 4.818895  | 0.107834  |
| 26 | 8 | 0 | -2.268870 | 3.572407  | 1.922939  |
| 27 | 6 | 0 | -1.483231 | 2.950968  | 2.948941  |
| 28 | 1 | 0 | 1.090460  | -1.975383 | -1.373412 |
| 29 | 1 | 0 | 1.732047  | -0.779242 | -2.498967 |
| 30 | 1 | 0 | 3.924300  | -0.208379 | -1.956938 |
| 31 | 1 | 0 | 1.125432  | -0.933732 | 1.237953  |
| 32 | 1 | 0 | 2.897898  | -0.490110 | 2.912569  |
| 33 | 1 | 0 | -1.859461 | -0.043697 | -1.947495 |
| 34 | 1 | 0 | -0.793249 | -0.909512 | -3.051419 |
| 35 | 1 | 0 | -2.012784 | -1.220834 | 0.525603  |
| 36 | 1 | 0 | -1.095545 | -3.241328 | -3.149562 |

|    |    |   |           |           |           |
|----|----|---|-----------|-----------|-----------|
| 37 | 1  | 0 | -1.896757 | -5.371993 | -2.170319 |
| 38 | 1  | 0 | -3.128640 | -5.630667 | 1.112678  |
| 39 | 1  | 0 | 1.244556  | 1.595051  | -1.250732 |
| 40 | 1  | 0 | 0.388796  | 1.344974  | -2.771245 |
| 41 | 1  | 0 | -0.368235 | 1.899899  | 0.885008  |
| 42 | 1  | 0 | -1.479457 | 2.711698  | -3.179020 |
| 43 | 1  | 0 | -3.245515 | 4.272561  | -2.381323 |
| 44 | 1  | 0 | -3.767234 | 4.854810  | 1.076398  |
| 45 | 1  | 0 | -0.429772 | 3.228087  | 2.853865  |
| 46 | 1  | 0 | -1.877763 | 3.328984  | 3.890924  |
| 47 | 1  | 0 | -1.589306 | 1.863246  | 2.915646  |
| 48 | 17 | 0 | -3.020674 | -3.360494 | 2.122481  |
| 49 | 17 | 0 | 6.306667  | 0.399111  | -0.508576 |

5. ARO./X' (0,2)

Sum of electronic and thermal Enthalpies= -2126.386321  
 Frequencies -- 14.9944 15.7916 18.7258

| Center<br>Number | Atomic<br>Number | Atomic<br>Type | Coordinates (Angstroms) |           |           |
|------------------|------------------|----------------|-------------------------|-----------|-----------|
|                  |                  |                | X                       | Y         | Z         |
| 1                | 7                | 0              | 0.050466                | -0.251420 | -1.271722 |
| 2                | 6                | 0              | 1.232473                | -1.113677 | -1.479788 |
| 3                | 6                | 0              | 2.358864                | -0.842367 | -0.506612 |
| 4                | 6                | 0              | 3.586374                | -0.353919 | -0.953610 |
| 5                | 6                | 0              | 2.206082                | -1.099193 | 0.862937  |
| 6                | 6                | 0              | 4.624290                | -0.126800 | -0.053853 |
| 7                | 6                | 0              | 3.241296                | -0.870138 | 1.757881  |
| 8                | 6                | 0              | 4.470860                | -0.376139 | 1.311886  |
| 9                | 8                | 0              | 5.448910                | -0.172066 | 2.240008  |
| 10               | 6                | 0              | -1.106524               | -0.781923 | -1.997109 |
| 11               | 6                | 0              | -1.699785               | -2.023675 | -1.384407 |
| 12               | 6                | 0              | -1.867001               | -2.123390 | 0.014629  |
| 13               | 6                | 0              | -2.147472               | -3.080900 | -2.214818 |
| 14               | 6                | 0              | -2.449953               | -3.235864 | 0.563791  |
| 15               | 6                | 0              | -2.733697               | -4.197590 | -1.684063 |
| 16               | 6                | 0              | -2.922319               | -4.350598 | -0.255519 |
| 17               | 8                | 0              | -3.455817               | -5.371536 | 0.235216  |
| 18               | 6                | 0              | 0.331379                | 1.142944  | -1.670768 |
| 19               | 6                | 0              | -0.714757               | 2.132743  | -1.206518 |
| 20               | 6                | 0              | -0.888854               | 2.378091  | 0.166164  |
| 21               | 6                | 0              | -1.501055               | 2.832097  | -2.120686 |
| 22               | 6                | 0              | -1.832781               | 3.298891  | 0.604981  |
| 23               | 6                | 0              | -2.451225               | 3.761839  | -1.686320 |
| 24               | 6                | 0              | -2.621155               | 3.996927  | -0.331525 |
| 25               | 8                | 0              | -3.554943               | 4.910401  | 0.087566  |
| 26               | 8                | 0              | -2.088102               | 3.621124  | 1.911426  |
| 27               | 6                | 0              | -1.321499               | 2.980897  | 2.940429  |
| 28               | 1                | 0              | 0.905560                | -2.149596 | -1.354916 |
| 29               | 1                | 0              | 1.608932                | -1.020437 | -2.511272 |
| 30               | 1                | 0              | 3.740307                | -0.147012 | -2.006488 |
| 31               | 1                | 0              | 1.264963                | -1.488880 | 1.234654  |
| 32               | 1                | 0              | 3.121875                | -1.074032 | 2.816183  |

|    |    |   |           |           |           |
|----|----|---|-----------|-----------|-----------|
| 33 | 1  | 0 | 6.253598  | 0.172883  | 1.826246  |
| 34 | 1  | 0 | -1.888775 | -0.012534 | -1.990723 |
| 35 | 1  | 0 | -0.873714 | -0.976821 | -3.056490 |
| 36 | 1  | 0 | -1.532070 | -1.311450 | 0.647008  |
| 37 | 1  | 0 | -2.012834 | -2.996614 | -3.287794 |
| 38 | 1  | 0 | -3.073971 | -5.014178 | -2.310958 |
| 39 | 1  | 0 | 1.295640  | 1.412316  | -1.233349 |
| 40 | 1  | 0 | 0.444266  | 1.220371  | -2.764665 |
| 41 | 1  | 0 | -0.277717 | 1.844907  | 0.883366  |
| 42 | 1  | 0 | -1.376930 | 2.656950  | -3.184040 |
| 43 | 1  | 0 | -3.064373 | 4.307217  | -2.395462 |
| 44 | 1  | 0 | -3.540237 | 4.956231  | 1.055597  |
| 45 | 1  | 0 | -0.257279 | 3.206467  | 2.829940  |
| 46 | 1  | 0 | -1.687883 | 3.393124  | 3.879422  |
| 47 | 1  | 0 | -1.478666 | 1.898953  | 2.927263  |
| 48 | 17 | 0 | 6.170450  | 0.494655  | -0.645603 |
| 49 | 17 | 0 | -2.661750 | -3.353994 | 2.292446  |

6. ARO./Y (0,2)

Sum of electronic and thermal Enthalpies= -2126.391105  
 Frequencies -- 14.5190 17.5147 19.2737

| Center<br>Number | Atomic<br>Number | Atomic<br>Type | Coordinates (Angstroms) |           |           |
|------------------|------------------|----------------|-------------------------|-----------|-----------|
|                  |                  |                | X                       | Y         | Z         |
| 1                | 7                | 0              | 0.106438                | -0.117647 | -1.221323 |
| 2                | 6                | 0              | 1.233790                | -1.051982 | -1.404756 |
| 3                | 6                | 0              | 2.370095                | -0.822762 | -0.431879 |
| 4                | 6                | 0              | 3.625211                | -0.415193 | -0.883229 |
| 5                | 6                | 0              | 2.197933                | -1.037757 | 0.942809  |
| 6                | 6                | 0              | 4.670754                | -0.225844 | 0.016469  |
| 7                | 6                | 0              | 3.241446                | -0.847661 | 1.837425  |
| 8                | 6                | 0              | 4.499176                | -0.435180 | 1.386568  |
| 9                | 8                | 0              | 5.483935                | -0.264411 | 2.314529  |
| 10               | 6                | 0              | -1.089558               | -0.577330 | -1.955314 |
| 11               | 6                | 0              | -1.708053               | -1.837319 | -1.389290 |
| 12               | 6                | 0              | -2.214971               | -1.856914 | -0.086623 |
| 13               | 6                | 0              | -1.813862               | -3.001336 | -2.157423 |
| 14               | 6                | 0              | -2.796976               | -3.010782 | 0.420588  |
| 15               | 6                | 0              | -2.402602               | -4.154323 | -1.648639 |
| 16               | 6                | 0              | -2.902717               | -4.176770 | -0.346949 |
| 17               | 8                | 0              | -3.465890               | -5.332930 | 0.106813  |
| 18               | 6                | 0              | 0.476414                | 1.238878  | -1.647961 |
| 19               | 6                | 0              | -0.475348               | 2.313006  | -1.177554 |
| 20               | 6                | 0              | -0.865626               | 2.376314  | 0.166077  |
| 21               | 6                | 0              | -0.938122               | 3.295171  | -2.095148 |
| 22               | 6                | 0              | -1.704589               | 3.388686  | 0.607584  |
| 23               | 6                | 0              | -1.765726               | 4.307158  | -1.690584 |
| 24               | 6                | 0              | -2.200596               | 4.416972  | -0.320637 |
| 25               | 8                | 0              | -2.961189               | 5.336485  | 0.076842  |
| 26               | 8                | 0              | -2.133374               | 3.541258  | 1.866339  |
| 27               | 6                | 0              | -1.712595               | 2.602013  | 2.874041  |
| 28               | 1                | 0              | 0.843757                | -2.061557 | -1.256038 |

|    |    |   |           |           |           |
|----|----|---|-----------|-----------|-----------|
| 29 | 1  | 0 | 1.619744  | -1.007130 | -2.436270 |
| 30 | 1  | 0 | 3.795914  | -0.242738 | -1.939731 |
| 31 | 1  | 0 | 1.234694  | -1.364386 | 1.318857  |
| 32 | 1  | 0 | 3.106454  | -1.019925 | 2.899494  |
| 33 | 1  | 0 | 6.313699  | 0.005655  | 1.894253  |
| 34 | 1  | 0 | -1.826047 | 0.229910  | -1.910757 |
| 35 | 1  | 0 | -0.858574 | -0.738635 | -3.021016 |
| 36 | 1  | 0 | -2.158850 | -0.972793 | 0.536738  |
| 37 | 1  | 0 | -1.427792 | -3.009808 | -3.171185 |
| 38 | 1  | 0 | -2.479213 | -5.054502 | -2.248156 |
| 39 | 1  | 0 | -3.765067 | -5.231599 | 1.022547  |
| 40 | 1  | 0 | 1.463287  | 1.462434  | -1.227821 |
| 41 | 1  | 0 | 0.580555  | 1.300811  | -2.743249 |
| 42 | 1  | 0 | -0.500063 | 1.627318  | 0.854913  |
| 43 | 1  | 0 | -0.627106 | 3.228948  | -3.132333 |
| 44 | 1  | 0 | -2.127082 | 5.057293  | -2.385405 |
| 45 | 1  | 0 | -0.626601 | 2.626322  | 2.988683  |
| 46 | 1  | 0 | -2.191843 | 2.932396  | 3.793296  |
| 47 | 1  | 0 | -2.046272 | 1.593488  | 2.619953  |
| 48 | 17 | 0 | 6.250051  | 0.296060  | -0.582750 |
| 49 | 17 | 0 | -3.431377 | -3.017903 | 2.071738  |

7. Radical Cation (1,2)

Sum of electronic and thermal Enthalpies= -2126.817971  
 Frequencies -- 10.9221 12.1089 16.0180

| Center Number | Atomic Number | Atomic Type | Coordinates (Angstroms) |           |           |
|---------------|---------------|-------------|-------------------------|-----------|-----------|
|               |               |             | X                       | Y         | Z         |
| 1             | 7             | 0           | -0.260045               | -1.456961 | -2.110548 |
| 2             | 6             | 0           | 0.440663                | -2.628594 | -1.574228 |
| 3             | 6             | 0           | 1.417214                | -2.296234 | -0.463564 |
| 4             | 6             | 0           | 2.787975                | -2.257551 | -0.717182 |
| 5             | 6             | 0           | 0.959765                | -2.059005 | 0.838851  |
| 6             | 6             | 0           | 3.677204                | -1.982480 | 0.314794  |
| 7             | 6             | 0           | 1.852271                | -1.790545 | 1.865618  |
| 8             | 6             | 0           | 3.227815                | -1.744356 | 1.618960  |
| 9             | 8             | 0           | 4.050543                | -1.472558 | 2.664441  |
| 10            | 6             | 0           | -1.724041               | -1.464760 | -2.189049 |
| 11            | 6             | 0           | -2.404799               | -1.553419 | -0.837477 |
| 12            | 6             | 0           | -2.483292               | -0.422839 | -0.020818 |
| 13            | 6             | 0           | -2.990546               | -2.746547 | -0.403213 |
| 14            | 6             | 0           | -3.132708               | -0.498375 | 1.203131  |
| 15            | 6             | 0           | -3.638773               | -2.816125 | 0.822645  |
| 16            | 6             | 0           | -3.716330               | -1.692239 | 1.648145  |
| 17            | 8             | 0           | -4.361004               | -1.818923 | 2.836369  |
| 18            | 6             | 0           | 0.498994                | -0.419119 | -2.813573 |
| 19            | 6             | 0           | 0.225497                | 0.983283  | -2.306141 |
| 20            | 6             | 0           | 0.734794                | 1.387300  | -1.060704 |
| 21            | 6             | 0           | -0.495284               | 1.886971  | -3.084327 |
| 22            | 6             | 0           | 0.526651                | 2.685687  | -0.612415 |
| 23            | 6             | 0           | -0.705289               | 3.191858  | -2.636651 |
| 24            | 6             | 0           | -0.200942               | 3.594867  | -1.408475 |



|    |    |   |           |           |           |
|----|----|---|-----------|-----------|-----------|
| 25 | 8  | 0 | -0.409665 | 4.875549  | -0.984948 |
| 26 | 8  | 0 | 0.975994  | 3.202671  | 0.568874  |
| 27 | 6  | 0 | 1.744671  | 2.361558  | 1.441306  |
| 28 | 1  | 0 | -0.309542 | -3.339354 | -1.234202 |
| 29 | 1  | 0 | 0.975902  | -3.069234 | -2.424099 |
| 30 | 1  | 0 | 3.169234  | -2.451779 | -1.712592 |
| 31 | 1  | 0 | -0.101901 | -2.092738 | 1.053892  |
| 32 | 1  | 0 | 1.503393  | -1.614086 | 2.876580  |
| 33 | 1  | 0 | 4.980167  | -1.479709 | 2.390647  |
| 34 | 1  | 0 | -2.033304 | -0.573041 | -2.730661 |
| 35 | 1  | 0 | -1.984771 | -2.344768 | -2.790485 |
| 36 | 1  | 0 | -2.045868 | 0.516463  | -0.336805 |
| 37 | 1  | 0 | -2.949004 | -3.628383 | -1.032562 |
| 38 | 1  | 0 | -4.099033 | -3.737826 | 1.159406  |
| 39 | 1  | 0 | -4.355176 | -0.982750 | 3.325958  |
| 40 | 1  | 0 | 1.554825  | -0.673938 | -2.740371 |
| 41 | 1  | 0 | 0.199855  | -0.493981 | -3.866653 |
| 42 | 1  | 0 | 1.296250  | 0.686551  | -0.456941 |
| 43 | 1  | 0 | -0.884359 | 1.583443  | -4.049544 |
| 44 | 1  | 0 | -1.254404 | 3.906725  | -3.239012 |
| 45 | 1  | 0 | 0.014148  | 5.001070  | -0.122030 |
| 46 | 1  | 0 | 2.661766  | 2.027734  | 0.948605  |
| 47 | 1  | 0 | 1.994172  | 2.981276  | 2.300996  |
| 48 | 1  | 0 | 1.156370  | 1.499679  | 1.765927  |
| 49 | 17 | 0 | -3.239806 | 0.936513  | 2.224432  |
| 50 | 17 | 0 | 5.408368  | -1.938659 | -0.017122 |

#### S1.5- Compound 5

ArOH (0,1)

Sum of electronic and thermal Enthalpies= -6354.854309

Frequencies -- 10.9334 14.5599 14.8375

| Center Number | Atomic Number | Atomic Type | Coordinates (Angstroms) |           |           |
|---------------|---------------|-------------|-------------------------|-----------|-----------|
|               |               |             | X                       | Y         | Z         |
| 1             | 7             | 0           | 0.025342                | -0.202722 | -1.272058 |
| 2             | 6             | 0           | 1.167011                | -1.111572 | -1.486962 |
| 3             | 6             | 0           | 2.310918                | -0.888728 | -0.520785 |
| 4             | 6             | 0           | 3.550283                | -0.434587 | -0.971952 |
| 5             | 6             | 0           | 2.161979                | -1.158715 | 0.846783  |
| 6             | 6             | 0           | 4.603402                | -0.254689 | -0.077922 |
| 7             | 6             | 0           | 3.212094                | -0.978694 | 1.735208  |
| 8             | 6             | 0           | 4.454507                | -0.520980 | 1.284459  |
| 9             | 8             | 0           | 5.445505                | -0.366516 | 2.210517  |
| 10            | 6             | 0           | -1.169531               | -0.687002 | -1.987368 |
| 11            | 6             | 0           | -1.780802               | -1.932384 | -1.380830 |
| 12            | 6             | 0           | -2.325160               | -1.894336 | -0.093525 |
| 13            | 6             | 0           | -1.845993               | -3.135664 | -2.090472 |
| 14            | 6             | 0           | -2.906344               | -3.030383 | 0.455461  |
| 15            | 6             | 0           | -2.431788               | -4.270618 | -1.539944 |
| 16            | 6             | 0           | -2.971704               | -4.235144 | -0.253929 |
| 17            | 8             | 0           | -3.530960               | -5.381236 | 0.233625  |
| 18            | 6             | 0           | 0.364011                | 1.173788  | -1.686352 |
| 19            | 6             | 0           | -0.617939               | 2.220028  | -1.203390 |

|    |    |   |           |           |           |
|----|----|---|-----------|-----------|-----------|
| 20 | 6  | 0 | -0.740574 | 2.484452  | 0.171266  |
| 21 | 6  | 0 | -1.392534 | 2.952987  | -2.100809 |
| 22 | 6  | 0 | -1.623088 | 3.456125  | 0.628074  |
| 23 | 6  | 0 | -2.282259 | 3.932882  | -1.648246 |
| 24 | 6  | 0 | -2.402372 | 4.185384  | -0.291291 |
| 25 | 8  | 0 | -3.276798 | 5.147571  | 0.148137  |
| 26 | 8  | 0 | -1.822744 | 3.802539  | 1.938677  |
| 27 | 6  | 0 | -1.065640 | 3.126334  | 2.951385  |
| 28 | 1  | 0 | 0.799103  | -2.132381 | -1.358436 |
| 29 | 1  | 0 | 1.541507  | -1.035981 | -2.521235 |
| 30 | 1  | 0 | 3.695735  | -0.220216 | -2.024223 |
| 31 | 1  | 0 | 1.211076  | -1.521105 | 1.221682  |
| 32 | 1  | 0 | 3.095454  | -1.194126 | 2.791567  |
| 33 | 1  | 0 | 6.263699  | -0.061918 | 1.790651  |
| 34 | 1  | 0 | -1.910357 | 0.115449  | -1.961159 |
| 35 | 1  | 0 | -0.943984 | -0.877223 | -3.049916 |
| 36 | 1  | 0 | -2.296892 | -0.974412 | 0.478095  |
| 37 | 1  | 0 | -1.432228 | -3.189230 | -3.091887 |
| 38 | 1  | 0 | -2.478257 | -5.201316 | -2.094385 |
| 39 | 1  | 0 | -3.879211 | -5.241515 | 1.126853  |
| 40 | 1  | 0 | 1.350926  | 1.399524  | -1.275129 |
| 41 | 1  | 0 | 0.453957  | 1.240130  | -2.783502 |
| 42 | 1  | 0 | -0.136442 | 1.927045  | 0.875906  |
| 43 | 1  | 0 | -1.307899 | 2.764119  | -3.165728 |
| 44 | 1  | 0 | -2.887562 | 4.502783  | -2.344801 |
| 45 | 1  | 0 | -3.236875 | 5.188910  | 1.115693  |
| 46 | 1  | 0 | 0.006306  | 3.290447  | 2.811009  |
| 47 | 1  | 0 | -1.382495 | 3.564057  | 3.896884  |
| 48 | 1  | 0 | -1.283843 | 2.054889  | 2.950445  |
| 49 | 35 | 0 | -3.655674 | -2.951370 | 2.230075  |
| 50 | 35 | 0 | 6.303991  | 0.376871  | -0.729234 |

1. ArO-/X (-1,1)

Sum of electronic and thermal Enthalpies= -6354.394495  
 Frequencies -- 13.8160 17.8752 21.4072

| Center<br>Number | Atomic<br>Number | Atomic<br>Type | Coordinates (Angstroms) |           |           |
|------------------|------------------|----------------|-------------------------|-----------|-----------|
|                  |                  |                | X                       | Y         | Z         |
| 1                | 7                | 0              | -0.011091               | -0.261199 | -1.210316 |
| 2                | 6                | 0              | 0.800624                | -1.486877 | -1.378130 |
| 3                | 6                | 0              | 1.975523                | -1.588005 | -0.432366 |
| 4                | 6                | 0              | 3.292083                | -1.577653 | -0.904032 |
| 5                | 6                | 0              | 1.795071                | -1.723676 | 0.953415  |
| 6                | 6                | 0              | 4.372693                | -1.691164 | -0.034737 |
| 7                | 6                | 0              | 2.872913                | -1.829763 | 1.818185  |
| 8                | 6                | 0              | 4.239433                | -1.814456 | 1.383756  |
| 9                | 8                | 0              | 5.220955                | -1.907872 | 2.215732  |
| 10               | 6                | 0              | -1.285993               | -0.373425 | -1.938765 |
| 11               | 6                | 0              | -2.261134               | -1.353428 | -1.320057 |
| 12               | 6                | 0              | -2.764973               | -1.130375 | -0.035083 |
| 13               | 6                | 0              | -2.706945               | -2.480625 | -2.017499 |
| 14               | 6                | 0              | -3.678062               | -2.016171 | 0.523150  |

|    |    |   |           |           |           |
|----|----|---|-----------|-----------|-----------|
| 15 | 6  | 0 | -3.624334 | -3.363638 | -1.457857 |
| 16 | 6  | 0 | -4.124625 | -3.144353 | -0.174078 |
| 17 | 8  | 0 | -5.020865 | -4.046908 | 0.323431  |
| 18 | 6  | 0 | 0.736378  | 0.934002  | -1.645008 |
| 19 | 6  | 0 | 0.127909  | 2.240020  | -1.179126 |
| 20 | 6  | 0 | 0.105655  | 2.550899  | 0.191246  |
| 21 | 6  | 0 | -0.395735 | 3.160685  | -2.085201 |
| 22 | 6  | 0 | -0.433980 | 3.752154  | 0.635297  |
| 23 | 6  | 0 | -0.940426 | 4.372008  | -1.645449 |
| 24 | 6  | 0 | -0.963966 | 4.669816  | -0.292647 |
| 25 | 8  | 0 | -1.499996 | 5.859365  | 0.134879  |
| 26 | 8  | 0 | -0.504613 | 4.163145  | 1.940825  |
| 27 | 6  | 0 | 0.026219  | 3.305802  | 2.960548  |
| 28 | 1  | 0 | 0.128562  | -2.333244 | -1.211518 |
| 29 | 1  | 0 | 1.160344  | -1.571819 | -2.418324 |
| 30 | 1  | 0 | 3.474764  | -1.481008 | -1.969286 |
| 31 | 1  | 0 | 0.787975  | -1.748854 | 1.361001  |
| 32 | 1  | 0 | 2.703740  | -1.935541 | 2.886685  |
| 33 | 1  | 0 | -1.745938 | 0.617908  | -1.947025 |
| 34 | 1  | 0 | -1.117225 | -0.653247 | -2.992624 |
| 35 | 1  | 0 | -2.443872 | -0.262434 | 0.528209  |
| 36 | 1  | 0 | -2.330550 | -2.674806 | -3.016292 |
| 37 | 1  | 0 | -3.964243 | -4.237280 | -2.002858 |
| 38 | 1  | 0 | -5.300212 | -3.797122 | 1.216845  |
| 39 | 1  | 0 | 1.744769  | 0.846359  | -1.233673 |
| 40 | 1  | 0 | 0.840773  | 0.954191  | -2.743246 |
| 41 | 1  | 0 | 0.518547  | 1.846537  | 0.902279  |
| 42 | 1  | 0 | -0.383291 | 2.939071  | -3.147152 |
| 43 | 1  | 0 | -1.350508 | 5.088575  | -2.348887 |
| 44 | 1  | 0 | -1.435679 | 5.902037  | 1.101058  |
| 45 | 1  | 0 | 1.095332  | 3.134767  | 2.808010  |
| 46 | 1  | 0 | -0.129942 | 3.834460  | 3.899779  |
| 47 | 1  | 0 | -0.506074 | 2.350985  | 2.982843  |
| 48 | 35 | 0 | -4.361876 | -1.684706 | 2.295260  |
| 49 | 35 | 0 | 6.152211  | -1.679418 | -0.807232 |

2. ARO-/X' (-1,1)

Sum of electronic and thermal Enthalpies= -6354.394281  
 Frequencies -- 13.7212 15.8744 20.2447

| Center<br>Number | Atomic<br>Number | Atomic<br>Type | Coordinates (Angstroms) |           |           |
|------------------|------------------|----------------|-------------------------|-----------|-----------|
|                  |                  |                | X                       | Y         | Z         |
| 1                | 7                | 0              | 0.128591                | -0.169258 | -1.264866 |
| 2                | 6                | 0              | 1.231411                | 0.751762  | -1.590229 |
| 3                | 6                | 0              | 1.299373                | 1.964500  | -0.686472 |
| 4                | 6                | 0              | 1.119198                | 3.249326  | -1.198895 |
| 5                | 6                | 0              | 1.576333                | 1.830681  | 0.681510  |
| 6                | 6                | 0              | 1.212159                | 4.361345  | -0.364581 |
| 7                | 6                | 0              | 1.666494                | 2.939369  | 1.510499  |
| 8                | 6                | 0              | 1.484526                | 4.227955  | 0.997989  |
| 9                | 8                | 0              | 1.588534                | 5.275106  | 1.868494  |
| 10               | 6                | 0              | 0.312203                | -1.474745 | -1.940744 |

|    |    |   |           |           |           |
|----|----|---|-----------|-----------|-----------|
| 11 | 6  | 0 | 1.504200  | -2.270655 | -1.461586 |
| 12 | 6  | 0 | 1.516888  | -2.862924 | -0.190913 |
| 13 | 6  | 0 | 2.634329  | -2.466530 | -2.266760 |
| 14 | 6  | 0 | 2.609295  | -3.599047 | 0.247309  |
| 15 | 6  | 0 | 3.724924  | -3.205218 | -1.827544 |
| 16 | 6  | 0 | 3.788862  | -3.819070 | -0.536643 |
| 17 | 8  | 0 | 4.814875  | -4.496447 | -0.147866 |
| 18 | 6  | 0 | -1.169266 | 0.428474  | -1.634012 |
| 19 | 6  | 0 | -2.372185 | -0.294634 | -1.065546 |
| 20 | 6  | 0 | -2.586767 | -0.318035 | 0.322868  |
| 21 | 6  | 0 | -3.299853 | -0.916899 | -1.899278 |
| 22 | 6  | 0 | -3.701498 | -0.955358 | 0.855205  |
| 23 | 6  | 0 | -4.424198 | -1.559331 | -1.370721 |
| 24 | 6  | 0 | -4.627383 | -1.583184 | -0.000442 |
| 25 | 8  | 0 | -5.732096 | -2.215310 | 0.514070  |
| 26 | 8  | 0 | -4.016547 | -1.036789 | 2.186516  |
| 27 | 6  | 0 | -3.133290 | -0.430752 | 3.139702  |
| 28 | 1  | 0 | 2.162561  | 0.190222  | -1.487117 |
| 29 | 1  | 0 | 1.174046  | 1.083579  | -2.640924 |
| 30 | 1  | 0 | 0.905701  | 3.384939  | -2.252736 |
| 31 | 1  | 0 | 1.730047  | 0.843757  | 1.103590  |
| 32 | 1  | 0 | 1.886581  | 2.832133  | 2.566938  |
| 33 | 1  | 0 | 1.457892  | 6.118108  | 1.409658  |
| 34 | 1  | 0 | -0.602858 | -2.046625 | -1.768279 |
| 35 | 1  | 0 | 0.393016  | -1.330075 | -3.032357 |
| 36 | 1  | 0 | 0.657766  | -2.746136 | 0.461312  |
| 37 | 1  | 0 | 2.659585  | -2.029293 | -3.261792 |
| 38 | 1  | 0 | 4.587080  | -3.338783 | -2.475663 |
| 39 | 1  | 0 | -1.169792 | 1.456424  | -1.262282 |
| 40 | 1  | 0 | -1.271629 | 0.488108  | -2.731103 |
| 41 | 1  | 0 | -1.876832 | 0.169784  | 0.978750  |
| 42 | 1  | 0 | -3.150774 | -0.906791 | -2.973801 |
| 43 | 1  | 0 | -5.145232 | -2.046802 | -2.017953 |
| 44 | 1  | 0 | -5.710595 | -2.145626 | 1.480523  |
| 45 | 1  | 0 | -3.060741 | 0.647554  | 2.973088  |
| 46 | 1  | 0 | -3.578112 | -0.621209 | 4.115341  |
| 47 | 1  | 0 | -2.139649 | -0.884627 | 3.093196  |
| 48 | 35 | 0 | 0.955994  | 6.124002  | -1.102346 |
| 49 | 35 | 0 | 2.523283  | -4.382611 | 2.019170  |

3. ARO-/Y (-1,1)

Sum of electronic and thermal Enthalpies= -6354.388485  
 Frequencies -- 11.6925 12.4954 16.7623

| Center<br>Number | Atomic<br>Number | Atomic<br>Type | Coordinates (Angstroms) |           |           |
|------------------|------------------|----------------|-------------------------|-----------|-----------|
|                  |                  |                | X                       | Y         | Z         |
| 1                | 7                | 0              | 0.041485                | -0.087755 | -1.213793 |
| 2                | 6                | 0              | 1.449333                | -0.456323 | -1.447929 |
| 3                | 6                | 0              | 2.422463                | 0.217972  | -0.503958 |
| 4                | 6                | 0              | 3.380940                | 1.111052  | -0.983137 |
| 5                | 6                | 0              | 2.405748                | -0.061094 | 0.869787  |
| 6                | 6                | 0              | 4.289558                | 1.705570  | -0.110469 |

|    |    |   |           |           |           |
|----|----|---|-----------|-----------|-----------|
| 7  | 6  | 0 | 3.310654  | 0.533555  | 1.737122  |
| 8  | 6  | 0 | 4.270511  | 1.430839  | 1.258088  |
| 9  | 8  | 0 | 5.132128  | 1.979646  | 2.164165  |
| 10 | 6  | 0 | -0.861759 | -1.019493 | -1.911165 |
| 11 | 6  | 0 | -0.897751 | -2.406348 | -1.304910 |
| 12 | 6  | 0 | -1.391689 | -2.597502 | -0.010666 |
| 13 | 6  | 0 | -0.469753 | -3.529055 | -2.020683 |
| 14 | 6  | 0 | -1.443331 | -3.872642 | 0.538415  |
| 15 | 6  | 0 | -0.525918 | -4.804967 | -1.469921 |
| 16 | 6  | 0 | -1.013775 | -4.996209 | -0.177042 |
| 17 | 8  | 0 | -1.041445 | -6.271536 | 0.310969  |
| 18 | 6  | 0 | -0.212097 | 1.309937  | -1.638438 |
| 19 | 6  | 0 | -1.543502 | 1.871194  | -1.196740 |
| 20 | 6  | 0 | -1.780569 | 2.167125  | 0.161963  |
| 21 | 6  | 0 | -2.565872 | 2.137314  | -2.105553 |
| 22 | 6  | 0 | -2.990971 | 2.697163  | 0.585564  |
| 23 | 6  | 0 | -3.788773 | 2.671217  | -1.686940 |
| 24 | 6  | 0 | -4.065628 | 2.973339  | -0.332695 |
| 25 | 8  | 0 | -5.202142 | 3.470413  | 0.073393  |
| 26 | 8  | 0 | -3.272666 | 3.012711  | 1.902124  |
| 27 | 6  | 0 | -2.268414 | 2.770193  | 2.886126  |
| 28 | 1  | 0 | 1.532037  | -1.537705 | -1.313016 |
| 29 | 1  | 0 | 1.744939  | -0.242921 | -2.489057 |
| 30 | 1  | 0 | 3.419217  | 1.345204  | -2.040515 |
| 31 | 1  | 0 | 1.675905  | -0.757979 | 1.266814  |
| 32 | 1  | 0 | 3.297568  | 0.312058  | 2.798583  |
| 33 | 1  | 0 | 5.755088  | 2.578160  | 1.725832  |
| 34 | 1  | 0 | -1.864590 | -0.589166 | -1.865511 |
| 35 | 1  | 0 | -0.598407 | -1.101504 | -2.979500 |
| 36 | 1  | 0 | -1.738770 | -1.748303 | 0.565786  |
| 37 | 1  | 0 | -0.084955 | -3.406591 | -3.027586 |
| 38 | 1  | 0 | -0.191127 | -5.671389 | -2.029417 |
| 39 | 1  | 0 | -1.401082 | -6.287263 | 1.210389  |
| 40 | 1  | 0 | 0.595723  | 1.914615  | -1.217840 |
| 41 | 1  | 0 | -0.130170 | 1.393091  | -2.736150 |
| 42 | 1  | 0 | -0.992574 | 1.976773  | 0.881487  |
| 43 | 1  | 0 | -2.412143 | 1.926978  | -3.160921 |
| 44 | 1  | 0 | -4.572088 | 2.869871  | -2.413874 |
| 45 | 1  | 0 | -1.364378 | 3.355829  | 2.688140  |
| 46 | 1  | 0 | -2.699603 | 3.084771  | 3.836785  |
| 47 | 1  | 0 | -2.009739 | 1.707421  | 2.940251  |
| 48 | 35 | 0 | 5.602536  | 2.936888  | -0.800791 |
| 49 | 35 | 0 | -2.135296 | -4.112718 | 2.322335  |

4. ARO./X (0,2)

Sum of electronic and thermal Enthalpies= -6354.226384  
 Frequencies -- 12.5970 13.9783 18.7327

| Center<br>Number | Atomic<br>Number | Atomic<br>Type | Coordinates (Angstroms) |           |           |
|------------------|------------------|----------------|-------------------------|-----------|-----------|
|                  |                  |                | X                       | Y         | Z         |
| 1                | 7                | 0              | 0.106858                | -0.147519 | -1.223963 |
| 2                | 6                | 0              | 1.327519                | -0.933535 | -1.449246 |

|    |    |   |           |           |           |
|----|----|---|-----------|-----------|-----------|
| 3  | 6  | 0 | 2.430542  | -0.612124 | -0.473638 |
| 4  | 6  | 0 | 3.708276  | -0.247976 | -0.942505 |
| 5  | 6  | 0 | 2.205316  | -0.712257 | 0.924877  |
| 6  | 6  | 0 | 4.730123  | 0.012787  | -0.059786 |
| 7  | 6  | 0 | 3.208283  | -0.462636 | 1.817824  |
| 8  | 6  | 0 | 4.541642  | -0.081334 | 1.387120  |
| 9  | 8  | 0 | 5.456338  | 0.143911  | 2.209958  |
| 10 | 6  | 0 | -1.038109 | -0.741007 | -1.940329 |
| 11 | 6  | 0 | -1.503192 | -2.057309 | -1.355754 |
| 12 | 6  | 0 | -2.018792 | -2.109926 | -0.057114 |
| 13 | 6  | 0 | -1.457078 | -3.242225 | -2.097374 |
| 14 | 6  | 0 | -2.463824 | -3.314824 | 0.472156  |
| 15 | 6  | 0 | -1.908979 | -4.445828 | -1.567443 |
| 16 | 6  | 0 | -2.420667 | -4.500782 | -0.270495 |
| 17 | 8  | 0 | -2.846055 | -5.712043 | 0.192907  |
| 18 | 6  | 0 | 0.318364  | 1.259324  | -1.628050 |
| 19 | 6  | 0 | -0.780320 | 2.200352  | -1.184838 |
| 20 | 6  | 0 | -1.024198 | 2.406228  | 0.183636  |
| 21 | 6  | 0 | -1.544990 | 2.899107  | -2.117576 |
| 22 | 6  | 0 | -2.015946 | 3.286804  | 0.598905  |
| 23 | 6  | 0 | -2.540191 | 3.791387  | -1.706462 |
| 24 | 6  | 0 | -2.779269 | 3.987302  | -0.355827 |
| 25 | 8  | 0 | -3.755982 | 4.864203  | 0.042763  |
| 26 | 8  | 0 | -2.343412 | 3.565985  | 1.899203  |
| 27 | 6  | 0 | -1.636425 | 2.888934  | 2.946839  |
| 28 | 1  | 0 | 1.072851  | -1.991285 | -1.318851 |
| 29 | 1  | 0 | 1.698911  | -0.819907 | -2.479856 |
| 30 | 1  | 0 | 3.872600  | -0.169665 | -2.010678 |
| 31 | 1  | 0 | 1.222609  | -1.000643 | 1.278724  |
| 32 | 1  | 0 | 3.051566  | -0.547257 | 2.887528  |
| 33 | 1  | 0 | -1.857749 | -0.020845 | -1.887909 |
| 34 | 1  | 0 | -0.805031 | -0.882592 | -3.008374 |
| 35 | 1  | 0 | -2.074147 | -1.207255 | 0.539355  |
| 36 | 1  | 0 | -1.062241 | -3.226419 | -3.107611 |
| 37 | 1  | 0 | -1.871202 | -5.361539 | -2.146820 |
| 38 | 1  | 0 | -3.194305 | -5.635665 | 1.093583  |
| 39 | 1  | 0 | 1.263866  | 1.581829  | -1.182457 |
| 40 | 1  | 0 | 0.439494  | 1.335510  | -2.721017 |
| 41 | 1  | 0 | -0.431336 | 1.874623  | 0.916966  |
| 42 | 1  | 0 | -1.369398 | 2.751428  | -3.177833 |
| 43 | 1  | 0 | -3.136433 | 4.335883  | -2.430546 |
| 44 | 1  | 0 | -3.785759 | 4.881752  | 1.011394  |
| 45 | 1  | 0 | -0.570496 | 3.130848  | 2.917461  |
| 46 | 1  | 0 | -2.069187 | 3.253970  | 3.877072  |
| 47 | 1  | 0 | -1.777332 | 1.806978  | 2.874770  |
| 48 | 35 | 0 | -3.169689 | -3.359646 | 2.265581  |
| 49 | 35 | 0 | 6.442354  | 0.521702  | -0.713909 |

5. ARO./X' (0,2)

Sum of electronic and thermal Enthalpies= -6354.226525  
 Frequencies -- 13.5792 15.1676 16.8761

Center Atomic Atomic Coordinates (Angstroms)

| Number | Number | Type | X         | Y         | Z         |
|--------|--------|------|-----------|-----------|-----------|
| 1      | 7      | 0    | 0.032699  | -0.249655 | -1.280154 |
| 2      | 6      | 0    | 1.211809  | -1.116058 | -1.485584 |
| 3      | 6      | 0    | 2.339742  | -0.847811 | -0.513181 |
| 4      | 6      | 0    | 3.570362  | -0.369555 | -0.963637 |
| 5      | 6      | 0    | 2.187200  | -1.099001 | 0.857515  |
| 6      | 6      | 0    | 4.611535  | -0.147317 | -0.065499 |
| 7      | 6      | 0    | 3.224808  | -0.874658 | 1.750269  |
| 8      | 6      | 0    | 4.457991  | -0.391549 | 1.300681  |
| 9      | 8      | 0    | 5.436105  | -0.192713 | 2.231130  |
| 10     | 6      | 0    | -1.122988 | -0.774841 | -2.015545 |
| 11     | 6      | 0    | -1.710838 | -2.021608 | -1.406601 |
| 12     | 6      | 0    | -1.987610 | -2.069006 | -0.020832 |
| 13     | 6      | 0    | -2.033794 | -3.136254 | -2.216672 |
| 14     | 6      | 0    | -2.554597 | -3.184920 | 0.538185  |
| 15     | 6      | 0    | -2.598837 | -4.260277 | -1.676807 |
| 16     | 6      | 0    | -2.893385 | -4.363067 | -0.259826 |
| 17     | 8      | 0    | -3.403294 | -5.395595 | 0.229041  |
| 18     | 6      | 0    | 0.319670  | 1.145889  | -1.672614 |
| 19     | 6      | 0    | -0.720804 | 2.138123  | -1.200512 |
| 20     | 6      | 0    | -0.879282 | 2.387352  | 0.173419  |
| 21     | 6      | 0    | -1.517711 | 2.835193  | -2.107274 |
| 22     | 6      | 0    | -1.818221 | 3.308926  | 0.620652  |
| 23     | 6      | 0    | -2.463220 | 3.765784  | -1.664311 |
| 24     | 6      | 0    | -2.617853 | 4.004044  | -0.308216 |
| 25     | 8      | 0    | -3.545165 | 4.919747  | 0.120112  |
| 26     | 8      | 0    | -2.057200 | 3.634797  | 1.929277  |
| 27     | 6      | 0    | -1.284683 | 2.988772  | 2.950197  |
| 28     | 1      | 0    | 0.881106  | -2.150492 | -1.358170 |
| 29     | 1      | 0    | 1.588836  | -1.026960 | -2.517227 |
| 30     | 1      | 0    | 3.717782  | -0.169143 | -2.018371 |
| 31     | 1      | 0    | 1.244087  | -1.481025 | 1.232083  |
| 32     | 1      | 0    | 3.105505  | -1.074015 | 2.809446  |
| 33     | 1      | 0    | 6.246067  | 0.136053  | 1.813505  |
| 34     | 1      | 0    | -1.904021 | -0.005301 | -2.005108 |
| 35     | 1      | 0    | -0.883112 | -0.963880 | -3.074150 |
| 36     | 1      | 0    | -1.747892 | -1.207162 | 0.588430  |
| 37     | 1      | 0    | -1.819362 | -3.092806 | -3.279008 |
| 38     | 1      | 0    | -2.842617 | -5.122878 | -2.286977 |
| 39     | 1      | 0    | 1.285636  | 1.408405  | -1.235014 |
| 40     | 1      | 0    | 0.431081  | 1.228074  | -2.766241 |
| 41     | 1      | 0    | -0.258733 | 1.857994  | 0.885391  |
| 42     | 1      | 0    | -1.405221 | 2.658169  | -3.171619 |
| 43     | 1      | 0    | -3.084609 | 4.309196  | -2.367773 |
| 44     | 1      | 0    | -3.521690 | 4.962762  | 1.088163  |
| 45     | 1      | 0    | -0.220699 | 3.212249  | 2.833072  |
| 46     | 1      | 0    | -1.643444 | 3.397728  | 3.893533  |
| 47     | 1      | 0    | -1.444413 | 1.907220  | 2.933626  |
| 48     | 35     | 0    | 6.301674  | 0.512701  | -0.715097 |
| 49     | 35     | 0    | -2.934956 | -3.228350 | 2.404252  |

6. ARO./Y (0,2)

Sum of electronic and thermal Enthalpies= -6354.230920  
 Frequencies -- 11.8280 14.5405 17.1143

| Center<br>Number | Atomic<br>Number | Atomic<br>Type | Coordinates (Angstroms) |           |           |
|------------------|------------------|----------------|-------------------------|-----------|-----------|
|                  |                  |                | X                       | Y         | Z         |
| 1                | 7                | 0              | 0.107484                | -0.127672 | -1.235485 |
| 2                | 6                | 0              | 1.242558                | -1.053260 | -1.418521 |
| 3                | 6                | 0              | 2.372254                | -0.823655 | -0.438311 |
| 4                | 6                | 0              | 3.620095                | -0.380758 | -0.877448 |
| 5                | 6                | 0              | 2.201029                | -1.073228 | 0.930588  |
| 6                | 6                | 0              | 4.660214                | -0.191979 | 0.029679  |
| 7                | 6                | 0              | 3.238275                | -0.884273 | 1.831921  |
| 8                | 6                | 0              | 4.489344                | -0.437880 | 1.393411  |
| 9                | 8                | 0              | 5.466289                | -0.273876 | 2.331959  |
| 10               | 6                | 0              | -1.079720               | -0.592859 | -1.981744 |
| 11               | 6                | 0              | -1.708903               | -1.845532 | -1.411215 |
| 12               | 6                | 0              | -2.293255               | -1.827460 | -0.141210 |
| 13               | 6                | 0              | -1.749392               | -3.038133 | -2.140755 |
| 14               | 6                | 0              | -2.888296               | -2.972803 | 0.372816  |
| 15               | 6                | 0              | -2.348047               | -4.182246 | -1.625269 |
| 16               | 6                | 0              | -2.926707               | -4.167375 | -0.355629 |
| 17               | 8                | 0              | -3.495915               | -5.322187 | 0.096846  |
| 18               | 6                | 0              | 0.471370                | 1.234063  | -1.653675 |
| 19               | 6                | 0              | -0.485054               | 2.300639  | -1.174847 |
| 20               | 6                | 0              | -0.845173               | 2.374221  | 0.176855  |
| 21               | 6                | 0              | -0.982351               | 3.265294  | -2.092777 |
| 22               | 6                | 0              | -1.686427               | 3.381478  | 0.626212  |
| 23               | 6                | 0              | -1.816463               | 4.269248  | -1.681485 |
| 24               | 6                | 0              | -2.221639               | 4.388850  | -0.303447 |
| 25               | 8                | 0              | -2.988722               | 5.300220  | 0.100080  |
| 26               | 8                | 0              | -2.083519               | 3.548322  | 1.893403  |
| 27               | 6                | 0              | -1.618208               | 2.635402  | 2.905440  |
| 28               | 1                | 0              | 0.859554                | -2.066568 | -1.278163 |
| 29               | 1                | 0              | 1.632883                | -0.998808 | -2.447813 |
| 30               | 1                | 0              | 3.782445                | -0.183224 | -1.930502 |
| 31               | 1                | 0              | 1.243177                | -1.426882 | 1.296035  |
| 32               | 1                | 0              | 3.104985                | -1.083870 | 2.889388  |
| 33               | 1                | 0              | 6.292527                | 0.020772  | 1.920757  |
| 34               | 1                | 0              | -1.815887               | 0.214873  | -1.955183 |
| 35               | 1                | 0              | -0.833383               | -0.764126 | -3.042383 |
| 36               | 1                | 0              | -2.286573               | -0.916205 | 0.444547  |
| 37               | 1                | 0              | -1.305283               | -3.075799 | -3.129722 |
| 38               | 1                | 0              | -2.374907               | -5.104763 | -2.194396 |
| 39               | 1                | 0              | -3.864449               | -5.200296 | 0.984481  |
| 40               | 1                | 0              | 1.457082                | 1.458669  | -1.232200 |
| 41               | 1                | 0              | 0.573907                | 1.303132  | -2.748495 |
| 42               | 1                | 0              | -0.452947               | 1.638408  | 0.865548  |
| 43               | 1                | 0              | -0.692951               | 3.191880  | -3.135685 |
| 44               | 1                | 0              | -2.205164               | 5.005403  | -2.376490 |
| 45               | 1                | 0              | -0.529603               | 2.676949  | 2.985247  |
| 46               | 1                | 0              | -2.073376               | 2.977306  | 3.832688  |
| 47               | 1                | 0              | -1.944917               | 1.617447  | 2.681603  |
| 48               | 35               | 0              | 6.372638                | 0.423408  | -0.604988 |



49 35 0 -3.695214 -2.920809 2.122874

7. Radical Cation (1,2)

Sum of electronic and thermal Enthalpies= -6354.657527

Frequencies -- 2.5859 7.5008 17.7685

Center Atomic Atomic Coordinates (Angstroms)  
Number Number Type X Y Z

|    |   |   |           |           |           |
|----|---|---|-----------|-----------|-----------|
| 1  | 7 | 0 | -0.233508 | -1.441815 | -2.063668 |
| 2  | 6 | 0 | 0.476946  | -2.618569 | -1.553920 |
| 3  | 6 | 0 | 1.501677  | -2.301302 | -0.485174 |
| 4  | 6 | 0 | 2.864674  | -2.370923 | -0.771938 |
| 5  | 6 | 0 | 1.095393  | -1.977600 | 0.815361  |
| 6  | 6 | 0 | 3.798085  | -2.120822 | 0.228546  |
| 7  | 6 | 0 | 2.029864  | -1.732218 | 1.809042  |
| 8  | 6 | 0 | 3.399166  | -1.798367 | 1.530586  |
| 9  | 8 | 0 | 4.258876  | -1.546403 | 2.552353  |
| 10 | 6 | 0 | -1.694750 | -1.477250 | -2.167350 |
| 11 | 6 | 0 | -2.401126 | -1.582549 | -0.829520 |
| 12 | 6 | 0 | -2.487508 | -0.465731 | 0.005481  |
| 13 | 6 | 0 | -3.012808 | -2.775500 | -0.432116 |
| 14 | 6 | 0 | -3.174180 | -0.553071 | 1.209518  |
| 15 | 6 | 0 | -3.697667 | -2.856999 | 0.772112  |
| 16 | 6 | 0 | -3.787515 | -1.745794 | 1.614315  |
| 17 | 8 | 0 | -4.473214 | -1.894078 | 2.777970  |
| 18 | 6 | 0 | 0.516801  | -0.381384 | -2.743930 |
| 19 | 6 | 0 | 0.185477  | 1.012977  | -2.252028 |
| 20 | 6 | 0 | 0.683680  | 1.449915  | -1.013069 |
| 21 | 6 | 0 | -0.573279 | 1.878755  | -3.036802 |
| 22 | 6 | 0 | 0.423937  | 2.743359  | -0.577160 |
| 23 | 6 | 0 | -0.837521 | 3.177632  | -2.600022 |
| 24 | 6 | 0 | -0.346335 | 3.612437  | -1.377633 |
| 25 | 8 | 0 | -0.607483 | 4.885959  | -0.962141 |
| 26 | 8 | 0 | 0.857041  | 3.293963  | 0.594797  |
| 27 | 6 | 0 | 1.676204  | 2.503306  | 1.468288  |
| 28 | 1 | 0 | -0.264896 | -3.325091 | -1.186542 |
| 29 | 1 | 0 | 0.971549  | -3.065357 | -2.426030 |
| 30 | 1 | 0 | 3.197313  | -2.629893 | -1.769799 |
| 31 | 1 | 0 | 0.039515  | -1.924825 | 1.054136  |
| 32 | 1 | 0 | 1.720725  | -1.488604 | 2.819035  |
| 33 | 1 | 0 | 5.180188  | -1.631917 | 2.264130  |
| 34 | 1 | 0 | -2.012640 | -0.590819 | -2.712470 |
| 35 | 1 | 0 | -1.928712 | -2.360728 | -2.774263 |
| 36 | 1 | 0 | -2.025335 | 0.468812  | -0.286411 |
| 37 | 1 | 0 | -2.963981 | -3.647597 | -1.074240 |
| 38 | 1 | 0 | -4.179258 | -3.778106 | 1.079559  |
| 39 | 1 | 0 | -4.487637 | -1.067597 | 3.283755  |
| 40 | 1 | 0 | 1.577071  | -0.602256 | -2.633712 |
| 41 | 1 | 0 | 0.254970  | -0.471221 | -3.806239 |
| 42 | 1 | 0 | 1.276177  | 0.778150  | -0.405796 |
| 43 | 1 | 0 | -0.951779 | 1.551420  | -3.998383 |
| 44 | 1 | 0 | -1.418518 | 3.863005  | -3.206701 |

|    |    |   |           |           |           |
|----|----|---|-----------|-----------|-----------|
| 45 | 1  | 0 | -0.187174 | 5.032034  | -0.100594 |
| 46 | 1  | 0 | 2.603183  | 2.209307  | 0.968801  |
| 47 | 1  | 0 | 1.903720  | 3.145364  | 2.317580  |
| 48 | 1  | 0 | 1.135341  | 1.617162  | 1.810319  |
| 49 | 35 | 0 | -3.300341 | 0.995550  | 2.344632  |
| 50 | 35 | 0 | 5.674209  | -2.226396 | -0.179479 |

-----

## S2. Values of pKa obtained using ChemAxon pKa calculator

| Compound    | Reference (H) |              | Compound 1 (one <i>o</i> -OCH <sub>3</sub> ) |             | Compound 2 (two <i>o</i> -OCH <sub>3</sub> ) |              | Compound 3 ( <i>o</i> -NO <sub>2</sub> ) |             | Compound 4 ( <i>o</i> -Cl) |             | Compound 5 ( <i>o</i> -Br) |             |
|-------------|---------------|--------------|----------------------------------------------|-------------|----------------------------------------------|--------------|------------------------------------------|-------------|----------------------------|-------------|----------------------------|-------------|
|             | pKa           | <pKa>        | pKa                                          | <pKa>       | pKa                                          | <pKa>        | pKa                                      | <pKa>       | pKa                        | <pKa>       | pKa                        | <pKa>       |
| Phenol ring | 9.63          |              | 9.93                                         |             | 9.5                                          |              | 7.17                                     |             | 8.29                       |             | 8.46                       |             |
| X           |               | <b>9.38</b>  |                                              |             |                                              | <b>9.24</b>  |                                          | <b>6.65</b> |                            | <b>8.03</b> |                            | <b>8.19</b> |
| X'          | 9.13          |              | 9.45                                         | <b>9.93</b> | 8.97                                         |              | 6.13                                     |             | 7.77                       |             | 7.92                       |             |
| Y           | 10.17         | <b>10.17</b> | 10.41                                        |             | 10.10                                        | <b>10.10</b> | 9.93                                     | <b>9.93</b> | 9.94                       | <b>9.94</b> | 9.94                       | <b>9.94</b> |

### S3. Multistep DFT calculations in methanol:

#### Information ordered as follows:

Molecule (Charge, spin multiplicity), Enthalpies (au), lowest frequencies ( $\text{cm}^{-1}$ ), and, optimized geometries (Cartesian, Å) of Compounds **1** to **5** as well as reference obtained at the B3LYP/6-311++G\*\*

#### S3.0 - Reference

2<sup>nd</sup> PA (-1,2)

Sum of electronic and thermal Enthalpies= -1206.661375

Frequencies -- 13.2817 17.2390 23.3618

| Center Number | Atomic Number | Atomic Type | Coordinates (Angstroms) |           |           |
|---------------|---------------|-------------|-------------------------|-----------|-----------|
|               |               |             | X                       | Y         | Z         |
| 1             | 7             | 0           | 0.423142                | 0.018611  | -0.994775 |
| 2             | 6             | 0           | 1.596965                | 0.848419  | -1.295322 |
| 3             | 6             | 0           | 1.578840                | 2.189927  | -0.614831 |
| 4             | 6             | 0           | 1.784436                | 3.377239  | -1.356410 |
| 5             | 6             | 0           | 1.395970                | 2.281722  | 0.789737  |
| 6             | 6             | 0           | 1.798653                | 4.605921  | -0.743730 |
| 7             | 6             | 0           | 1.406694                | 3.494001  | 1.427661  |
| 8             | 6             | 0           | 1.605013                | 4.722374  | 0.686038  |
| 9             | 8             | 0           | 1.612491                | 5.847421  | 1.262001  |
| 10            | 6             | 0           | 0.659094                | -1.387290 | -1.403501 |
| 11            | 6             | 0           | 1.732121                | -2.095055 | -0.612485 |
| 12            | 6             | 0           | 1.531426                | -2.456659 | 0.730506  |
| 13            | 6             | 0           | 2.962316                | -2.445649 | -1.188209 |
| 14            | 6             | 0           | 2.504869                | -3.122651 | 1.463535  |
| 15            | 6             | 0           | 3.948874                | -3.115209 | -0.470404 |
| 16            | 6             | 0           | 3.765230                | -3.483537 | 0.894633  |
| 17            | 8             | 0           | 4.680760                | -4.112181 | 1.578827  |
| 18            | 6             | 0           | -0.778354               | 0.565635  | -1.658325 |
| 19            | 6             | 0           | -2.080630               | -0.040265 | -1.179799 |
| 20            | 6             | 0           | -2.484991               | 0.121596  | 0.156056  |
| 21            | 6             | 0           | -2.914545               | -0.734376 | -2.054869 |
| 22            | 6             | 0           | -3.692432               | -0.406433 | 0.597857  |
| 23            | 6             | 0           | -4.132833               | -1.264475 | -1.618201 |
| 24            | 6             | 0           | -4.524195               | -1.105080 | -0.298693 |
| 25            | 8             | 0           | -5.720910               | -1.627044 | 0.124515  |
| 26            | 8             | 0           | -4.187806               | -0.310389 | 1.871692  |
| 27            | 6             | 0           | -3.410255               | 0.376604  | 2.861326  |
| 28            | 1             | 0           | 2.479249                | 0.303500  | -0.937381 |
| 29            | 1             | 0           | 1.729795                | 0.987429  | -2.380924 |
| 30            | 1             | 0           | 1.926275                | 3.305707  | -2.429926 |
| 31            | 1             | 0           | 1.252347                | 1.370500  | 1.358808  |
| 32            | 1             | 0           | 1.275049                | 3.569688  | 2.501692  |
| 33            | 1             | 0           | -0.293435               | -1.908615 | -1.279203 |
| 34            | 1             | 0           | 0.907868                | -1.432620 | -2.478007 |
| 35            | 1             | 0           | 0.586318                | -2.213265 | 1.209955  |
| 36            | 1             | 0           | 3.150145                | -2.189261 | -2.228383 |
| 37            | 1             | 0           | 4.889944                | -3.372171 | -0.949732 |
| 38            | 1             | 0           | -0.796713               | 1.641360  | -1.461009 |
| 39            | 1             | 0           | -0.707009               | 0.445586  | -2.752457 |
| 40            | 1             | 0           | -1.849027               | 0.664378  | 0.843659  |

|    |   |   |           |           |           |
|----|---|---|-----------|-----------|-----------|
| 41 | 1 | 0 | -2.618120 | -0.868757 | -3.089706 |
| 42 | 1 | 0 | -4.782167 | -1.805921 | -2.297603 |
| 43 | 1 | 0 | -5.838364 | -1.422074 | 1.064407  |
| 44 | 1 | 0 | -3.262777 | 1.423787  | 2.583280  |
| 45 | 1 | 0 | -3.990009 | 0.320771  | 3.781477  |
| 46 | 1 | 0 | -2.443174 | -0.112781 | 3.005425  |
| 47 | 1 | 0 | 1.949113  | 5.519124  | -1.309268 |
| 48 | 1 | 0 | 2.316245  | -3.391596 | 2.499697  |

-----

2<sup>nd</sup> ETE (0,3)

Sum of electronic and thermal Enthalpies= -1206.495467  
 Frequencies -- 9.4953 20.5840 23.3799

-----

| Center<br>Number | Atomic<br>Number | Atomic<br>Type | Coordinates (Angstroms) |   |   |
|------------------|------------------|----------------|-------------------------|---|---|
|                  |                  |                | X                       | Y | Z |

|    |   |   |           |           |           |
|----|---|---|-----------|-----------|-----------|
| 1  | 7 | 0 | 0.457590  | 0.070890  | -1.069477 |
| 2  | 6 | 0 | 1.603849  | 0.942654  | -1.366504 |
| 3  | 6 | 0 | 1.578023  | 2.250274  | -0.616758 |
| 4  | 6 | 0 | 1.800241  | 3.469431  | -1.298757 |
| 5  | 6 | 0 | 1.379288  | 2.271434  | 0.787893  |
| 6  | 6 | 0 | 1.816979  | 4.666020  | -0.626098 |
| 7  | 6 | 0 | 1.392122  | 3.450260  | 1.485324  |
| 8  | 6 | 0 | 1.608183  | 4.712043  | 0.806259  |
| 9  | 8 | 0 | 1.615838  | 5.805793  | 1.436691  |
| 10 | 6 | 0 | 0.718209  | -1.302235 | -1.519691 |
| 11 | 6 | 0 | 1.720781  | -2.036736 | -0.668347 |
| 12 | 6 | 0 | 1.596293  | -2.049639 | 0.745021  |
| 13 | 6 | 0 | 2.773857  | -2.762852 | -1.272518 |
| 14 | 6 | 0 | 2.478974  | -2.748388 | 1.525428  |
| 15 | 6 | 0 | 3.673836  | -3.471062 | -0.515548 |
| 16 | 6 | 0 | 3.568535  | -3.494369 | 0.928638  |
| 17 | 8 | 0 | 4.390446  | -4.139607 | 1.637089  |
| 18 | 6 | 0 | -0.778612 | 0.610397  | -1.678693 |
| 19 | 6 | 0 | -2.043638 | -0.057535 | -1.188052 |
| 20 | 6 | 0 | -2.450198 | 0.100441  | 0.147992  |
| 21 | 6 | 0 | -2.836119 | -0.816994 | -2.047720 |
| 22 | 6 | 0 | -3.619017 | -0.495570 | 0.605249  |
| 23 | 6 | 0 | -4.014009 | -1.418989 | -1.594321 |
| 24 | 6 | 0 | -4.406678 | -1.264442 | -0.274534 |
| 25 | 8 | 0 | -5.561713 | -1.856957 | 0.166145  |
| 26 | 8 | 0 | -4.115442 | -0.407613 | 1.878201  |
| 27 | 6 | 0 | -3.397537 | 0.373137  | 2.843141  |
| 28 | 1 | 0 | 2.516382  | 0.412318  | -1.069176 |
| 29 | 1 | 0 | 1.692242  | 1.139334  | -2.446649 |
| 30 | 1 | 0 | 1.952892  | 3.449122  | -2.372815 |
| 31 | 1 | 0 | 1.221560  | 1.334196  | 1.308328  |
| 32 | 1 | 0 | 1.247716  | 3.474869  | 2.559986  |
| 33 | 1 | 0 | -0.227919 | -1.853465 | -1.464675 |
| 34 | 1 | 0 | 1.037288  | -1.330958 | -2.573696 |
| 35 | 1 | 0 | 0.782910  | -1.500512 | 1.204228  |
| 36 | 1 | 0 | 2.867165  | -2.748934 | -2.353469 |
| 37 | 1 | 0 | 4.487031  | -4.024684 | -0.972024 |

|    |   |   |           |           |           |
|----|---|---|-----------|-----------|-----------|
| 38 | 1 | 0 | -0.816802 | 1.675061  | -1.431760 |
| 39 | 1 | 0 | -0.732163 | 0.537983  | -2.777359 |
| 40 | 1 | 0 | -1.847157 | 0.695348  | 0.822049  |
| 41 | 1 | 0 | -2.539152 | -0.944808 | -3.083144 |
| 42 | 1 | 0 | -4.631587 | -2.011046 | -2.260855 |
| 43 | 1 | 0 | -5.682337 | -1.649370 | 1.105207  |
| 44 | 1 | 0 | -3.334898 | 1.418512  | 2.528716  |
| 45 | 1 | 0 | -3.972292 | 0.301644  | 3.765269  |
| 46 | 1 | 0 | -2.394355 | -0.031341 | 3.003280  |
| 47 | 1 | 0 | 1.978925  | 5.605189  | -1.143669 |
| 48 | 1 | 0 | 2.385970  | -2.770293 | 2.605800  |

-----

3<sup>rd</sup> PA (-1,3)

Sum of electronic and thermal Enthalpies= -1206.038847

Frequencies -- 18.1811 21.3803 23.9982

-----

| Center<br>Number | Atomic<br>Number | Atomic<br>Type | Coordinates (Angstroms) |           |           |
|------------------|------------------|----------------|-------------------------|-----------|-----------|
|                  |                  |                | X                       | Y         | Z         |
| 1                | 7                | 0              | 0.400982                | 0.027787  | -0.997441 |
| 2                | 6                | 0              | 1.591817                | 0.838114  | -1.290632 |
| 3                | 6                | 0              | 1.558336                | 2.203302  | -0.660466 |
| 4                | 6                | 0              | 1.782022                | 3.362700  | -1.439231 |
| 5                | 6                | 0              | 1.340420                | 2.346313  | 0.734620  |
| 6                | 6                | 0              | 1.781114                | 4.613095  | -0.871260 |
| 7                | 6                | 0              | 1.335242                | 3.581233  | 1.328191  |
| 8                | 6                | 0              | 1.551643                | 4.781775  | 0.547651  |
| 9                | 8                | 0              | 1.544473                | 5.927707  | 1.081792  |
| 10               | 6                | 0              | 0.632663                | -1.398692 | -1.342351 |
| 11               | 6                | 0              | 1.688501                | -2.075196 | -0.507453 |
| 12               | 6                | 0              | 1.479437                | -2.353524 | 0.854971  |
| 13               | 6                | 0              | 2.914970                | -2.476727 | -1.059893 |
| 14               | 6                | 0              | 2.441996                | -2.986190 | 1.628409  |
| 15               | 6                | 0              | 3.890823                | -3.113312 | -0.301818 |
| 16               | 6                | 0              | 3.700297                | -3.394315 | 1.084264  |
| 17               | 8                | 0              | 4.607530                | -3.985239 | 1.806338  |
| 18               | 6                | 0              | -0.769588               | 0.543044  | -1.722380 |
| 19               | 6                | 0              | -2.089925               | 0.000483  | -1.230328 |
| 20               | 6                | 0              | -2.380090               | -0.035753 | 0.139731  |
| 21               | 6                | 0              | -3.069614               | -0.420284 | -2.170303 |
| 22               | 6                | 0              | -3.615630               | -0.480319 | 0.585492  |
| 23               | 6                | 0              | -4.298116               | -0.864160 | -1.761572 |
| 24               | 6                | 0              | -4.646966               | -0.923223 | -0.364655 |
| 25               | 8                | 0              | -5.768598               | -1.328084 | 0.037802  |
| 26               | 8                | 0              | -3.994477               | -0.548724 | 1.868396  |
| 27               | 6                | 0              | -3.076198               | -0.136186 | 2.898405  |
| 28               | 1                | 0              | 2.454976                | 0.298331  | -0.882291 |
| 29               | 1                | 0              | 1.761586                | 0.934320  | -2.375265 |
| 30               | 1                | 0              | 1.951545                | 3.252747  | -2.505460 |
| 31               | 1                | 0              | 1.184621                | 1.456767  | 1.333981  |
| 32               | 1                | 0              | 1.177157                | 3.695365  | 2.395222  |
| 33               | 1                | 0              | -0.328332               | -1.905496 | -1.209415 |
| 34               | 1                | 0              | 0.895999                | -1.490689 | -2.409627 |

|    |   |   |           |           |           |
|----|---|---|-----------|-----------|-----------|
| 35 | 1 | 0 | 0.536785  | -2.069591 | 1.316026  |
| 36 | 1 | 0 | 3.106782  | -2.284393 | -2.112921 |
| 37 | 1 | 0 | 4.829875  | -3.410174 | -0.761196 |
| 38 | 1 | 0 | -0.792190 | 1.631653  | -1.594585 |
| 39 | 1 | 0 | -0.683801 | 0.357446  | -2.805392 |
| 40 | 1 | 0 | -1.626941 | 0.290359  | 0.843441  |
| 41 | 1 | 0 | -2.827082 | -0.388375 | -3.227225 |
| 42 | 1 | 0 | -5.048747 | -1.191765 | -2.472441 |
| 43 | 1 | 0 | -2.817091 | 0.918270  | 2.779363  |
| 44 | 1 | 0 | -3.609067 | -0.285074 | 3.835379  |
| 45 | 1 | 0 | -2.175920 | -0.754304 | 2.878266  |
| 46 | 1 | 0 | 1.946137  | 5.504948  | -1.466015 |
| 47 | 1 | 0 | 2.249622  | -3.190256 | 2.678429  |

-----

3<sup>rd</sup> ETE (0,4)

Sum of electronic and thermal Enthalpies= -1205.870860

Frequencies -- 15.2725 18.5440 20.6350

-----

| Center Number | Atomic Number | Atomic Type | Coordinates (Angstroms) |   |   |
|---------------|---------------|-------------|-------------------------|---|---|
|               |               |             | X                       | Y | Z |

|    |   |   |           |           |           |
|----|---|---|-----------|-----------|-----------|
| 1  | 7 | 0 | 0.438086  | 0.055271  | -1.096713 |
| 2  | 6 | 0 | 1.593276  | 0.922132  | -1.374152 |
| 3  | 6 | 0 | 1.535191  | 2.253083  | -0.667827 |
| 4  | 6 | 0 | 1.813165  | 3.445755  | -1.375569 |
| 5  | 6 | 0 | 1.251750  | 2.323691  | 0.720194  |
| 6  | 6 | 0 | 1.805323  | 4.664291  | -0.743402 |
| 7  | 6 | 0 | 1.237756  | 3.525661  | 1.377524  |
| 8  | 6 | 0 | 1.511672  | 4.761094  | 0.671390  |
| 9  | 8 | 0 | 1.497839  | 5.875293  | 1.264465  |
| 10 | 6 | 0 | 0.715927  | -1.333213 | -1.500156 |
| 11 | 6 | 0 | 1.691333  | -2.037079 | -0.590734 |
| 12 | 6 | 0 | 1.443994  | -2.111480 | 0.804081  |
| 13 | 6 | 0 | 2.843253  | -2.662478 | -1.120887 |
| 14 | 6 | 0 | 2.305172  | -2.772376 | 1.639569  |
| 15 | 6 | 0 | 3.726062  | -3.329355 | -0.307274 |
| 16 | 6 | 0 | 3.496791  | -3.412878 | 1.120067  |
| 17 | 8 | 0 | 4.300839  | -4.020922 | 1.879617  |
| 18 | 6 | 0 | -0.771327 | 0.560945  | -1.766942 |
| 19 | 6 | 0 | -2.055083 | -0.034529 | -1.236289 |
| 20 | 6 | 0 | -2.316305 | -0.036094 | 0.139134  |
| 21 | 6 | 0 | -3.019528 | -0.553037 | -2.142105 |
| 22 | 6 | 0 | -3.512814 | -0.542725 | 0.626147  |
| 23 | 6 | 0 | -4.206336 | -1.065536 | -1.692947 |
| 24 | 6 | 0 | -4.524472 | -1.097336 | -0.287133 |
| 25 | 8 | 0 | -5.603827 | -1.569994 | 0.151847  |
| 26 | 8 | 0 | -3.867493 | -0.578590 | 1.915260  |
| 27 | 6 | 0 | -2.968487 | -0.054248 | 2.910866  |
| 28 | 1 | 0 | 2.493219  | 0.403788  | -1.022943 |
| 29 | 1 | 0 | 1.725811  | 1.083861  | -2.455223 |
| 30 | 1 | 0 | 2.029851  | 3.387401  | -2.437117 |
| 31 | 1 | 0 | 1.051336  | 1.407085  | 1.261959  |
| 32 | 1 | 0 | 1.029142  | 3.588227  | 2.439991  |

|    |   |   |           |           |           |
|----|---|---|-----------|-----------|-----------|
| 33 | 1 | 0 | -0.229995 | -1.884940 | -1.463888 |
| 34 | 1 | 0 | 1.074051  | -1.385107 | -2.539772 |
| 35 | 1 | 0 | 0.552964  | -1.641963 | 1.204164  |
| 36 | 1 | 0 | 3.027878  | -2.603541 | -2.188350 |
| 37 | 1 | 0 | 4.615369  | -3.805273 | -0.705540 |
| 38 | 1 | 0 | -0.813729 | 1.643780  | -1.606738 |
| 39 | 1 | 0 | -0.718557 | 0.405012  | -2.855556 |
| 40 | 1 | 0 | -1.575361 | 0.369113  | 0.814218  |
| 41 | 1 | 0 | -2.797867 | -0.542938 | -3.203914 |
| 42 | 1 | 0 | -4.945097 | -1.470746 | -2.375531 |
| 43 | 1 | 0 | -2.782597 | 1.007762  | 2.735729  |
| 44 | 1 | 0 | -3.480336 | -0.190950 | 3.861211  |
| 45 | 1 | 0 | -2.029268 | -0.611574 | 2.909321  |
| 46 | 1 | 0 | 2.010773  | 5.583261  | -1.281328 |
| 47 | 1 | 0 | 2.119633  | -2.841888 | 2.705834  |

### S3.1- Compound 1

2<sup>nd</sup> PA (-1,2)

Sum of electronic and thermal Enthalpies= -1435.710312

Frequencies -- 11.3891 15.3565 20.0376

| Center<br>Number | Atomic<br>Number | Atomic<br>Type | Coordinates (Angstroms) |           |           |
|------------------|------------------|----------------|-------------------------|-----------|-----------|
|                  |                  |                | X                       | Y         | Z         |
| 1                | 7                | 0              | 0.084138                | -0.144655 | -1.116823 |
| 2                | 6                | 0              | 1.183532                | -1.109981 | -1.248835 |
| 3                | 6                | 0              | 2.296728                | -0.889572 | -0.257000 |
| 4                | 6                | 0              | 3.615741                | -0.737380 | -0.693820 |
| 5                | 6                | 0              | 2.009829                | -0.878176 | 1.138486  |
| 6                | 6                | 0              | 4.649401                | -0.568906 | 0.221032  |
| 7                | 6                | 0              | 3.004226                | -0.715513 | 2.061802  |
| 8                | 6                | 0              | 4.380275                | -0.548707 | 1.665045  |
| 9                | 8                | 0              | 5.940414                | -0.408337 | -0.095937 |
| 10               | 8                | 0              | 5.313096                | -0.396313 | 2.497273  |
| 11               | 6                | 0              | -1.125686               | -0.622073 | -1.828664 |
| 12               | 6                | 0              | -1.748161               | -1.865811 | -1.241028 |
| 13               | 6                | 0              | -2.367951               | -1.829311 | 0.025934  |
| 14               | 6                | 0              | -1.754301               | -3.077177 | -1.931954 |
| 15               | 6                | 0              | -2.955020               | -2.959893 | 0.574680  |
| 16               | 6                | 0              | -2.348063               | -4.219821 | -1.388534 |
| 17               | 6                | 0              | -2.971639               | -4.223915 | -0.117890 |
| 18               | 8                | 0              | -3.528639               | -5.279938 | 0.404127  |
| 19               | 6                | 0              | 0.498771                | 1.183310  | -1.613415 |
| 20               | 6                | 0              | -0.445901               | 2.306208  | -1.240261 |
| 21               | 6                | 0              | -0.617549               | 2.661874  | 0.108069  |
| 22               | 6                | 0              | -1.135465               | 3.022731  | -2.216965 |
| 23               | 6                | 0              | -1.466790               | 3.703715  | 0.462077  |
| 24               | 6                | 0              | -1.989914               | 4.073620  | -1.868319 |
| 25               | 6                | 0              | -2.160855               | 4.414610  | -0.536274 |
| 26               | 8                | 0              | -3.004152               | 5.444323  | -0.200209 |
| 27               | 8                | 0              | -1.708789               | 4.137436  | 1.739143  |
| 28               | 6                | 0              | -1.046354               | 3.476930  | 2.825804  |
| 29               | 6                | 0              | 6.334578                | -0.409267 | -1.481019 |

|    |   |   |           |           |           |
|----|---|---|-----------|-----------|-----------|
| 30 | 8 | 0 | -3.573593 | -2.982556 | 1.809309  |
| 31 | 6 | 0 | -3.603113 | -1.778695 | 2.574989  |
| 32 | 1 | 0 | 0.763785  | -2.105882 | -1.067040 |
| 33 | 1 | 0 | 1.594678  | -1.119561 | -2.271719 |
| 34 | 1 | 0 | 3.821060  | -0.747771 | -1.756754 |
| 35 | 1 | 0 | 0.983742  | -1.009784 | 1.461346  |
| 36 | 1 | 0 | 2.795339  | -0.714863 | 3.126145  |
| 37 | 1 | 0 | -1.845409 | 0.200288  | -1.799773 |
| 38 | 1 | 0 | -0.893739 | -0.803312 | -2.892473 |
| 39 | 1 | 0 | -2.381644 | -0.893724 | 0.572774  |
| 40 | 1 | 0 | -1.289396 | -3.135700 | -2.912724 |
| 41 | 1 | 0 | -2.341175 | -5.153220 | -1.945315 |
| 42 | 1 | 0 | 1.483890  | 1.395869  | -1.188954 |
| 43 | 1 | 0 | 0.622562  | 1.166610  | -2.709493 |
| 44 | 1 | 0 | -0.080058 | 2.118633  | 0.874821  |
| 45 | 1 | 0 | -1.013455 | 2.762904  | -3.263158 |
| 46 | 1 | 0 | -2.530271 | 4.629476  | -2.626912 |
| 47 | 1 | 0 | -3.018922 | 5.537629  | 0.764283  |
| 48 | 1 | 0 | 0.039163  | 3.574646  | 2.737159  |
| 49 | 1 | 0 | -1.386838 | 3.982190  | 3.728420  |
| 50 | 1 | 0 | -1.325110 | 2.420562  | 2.867995  |
| 51 | 1 | 0 | 5.854460  | 0.413155  | -2.015976 |
| 52 | 1 | 0 | 7.413416  | -0.267851 | -1.473300 |
| 53 | 1 | 0 | 6.086364  | -1.364606 | -1.948948 |
| 54 | 1 | 0 | -4.149339 | -0.986112 | 2.052869  |
| 55 | 1 | 0 | -4.124638 | -2.025887 | 3.499865  |
| 56 | 1 | 0 | -2.592043 | -1.430837 | 2.811328  |

-----

2<sup>nd</sup> ETE

Sum of electronic and thermal Enthalpies= -1435.551680  
 Frequencies -- 8.3223 12.9887 15.0727

-----

| Center<br>Number | Atomic<br>Number | Atomic<br>Type | Coordinates (Angstroms) |           |           |
|------------------|------------------|----------------|-------------------------|-----------|-----------|
|                  |                  |                | X                       | Y         | Z         |
| 1                | 7                | 0              | 0.106485                | -0.167873 | -1.145036 |
| 2                | 6                | 0              | 1.271293                | -1.057887 | -1.281723 |
| 3                | 6                | 0              | 2.369708                | -0.770564 | -0.286881 |
| 4                | 6                | 0              | 3.673883                | -0.537989 | -0.727845 |
| 5                | 6                | 0              | 2.085185                | -0.783548 | 1.109340  |
| 6                | 6                | 0              | 4.699346                | -0.312808 | 0.185442  |
| 7                | 6                | 0              | 3.069795                | -0.565410 | 2.031005  |
| 8                | 6                | 0              | 4.432755                | -0.313527 | 1.630943  |
| 9                | 8                | 0              | 5.975398                | -0.076915 | -0.135173 |
| 10               | 8                | 0              | 5.355669                | -0.106469 | 2.460158  |
| 11               | 6                | 0              | -1.043736               | -0.708488 | -1.887231 |
| 12               | 6                | 0              | -1.655231               | -1.934618 | -1.251398 |
| 13               | 6                | 0              | -2.096864               | -1.891679 | 0.077350  |
| 14               | 6                | 0              | -1.818029               | -3.123589 | -2.012680 |
| 15               | 6                | 0              | -2.688704               | -3.003389 | 0.658300  |
| 16               | 6                | 0              | -2.394513               | -4.238904 | -1.467548 |
| 17               | 6                | 0              | -2.861076               | -4.250717 | -0.103503 |
| 18               | 8                | 0              | -3.390506               | -5.263449 | 0.421509  |



|    |   |   |           |           |           |
|----|---|---|-----------|-----------|-----------|
| 19 | 6 | 0 | 0.437813  | 1.198969  | -1.603285 |
| 20 | 6 | 0 | -0.595696 | 2.238584  | -1.229735 |
| 21 | 6 | 0 | -0.814042 | 2.560304  | 0.120756  |
| 22 | 6 | 0 | -1.325197 | 2.911724  | -2.208497 |
| 23 | 6 | 0 | -1.746891 | 3.527777  | 0.474510  |
| 24 | 6 | 0 | -2.263092 | 3.888586  | -1.859902 |
| 25 | 6 | 0 | -2.478282 | 4.197616  | -0.526421 |
| 26 | 8 | 0 | -3.400191 | 5.156274  | -0.191463 |
| 27 | 8 | 0 | -2.042354 | 3.923109  | 1.752020  |
| 28 | 6 | 0 | -1.332140 | 3.317789  | 2.840797  |
| 29 | 6 | 0 | 6.364503  | -0.051485 | -1.522495 |
| 30 | 8 | 0 | -3.152260 | -3.063655 | 1.912325  |
| 31 | 6 | 0 | -3.048120 | -1.903378 | 2.759386  |
| 32 | 1 | 0 | 0.927588  | -2.083597 | -1.109212 |
| 33 | 1 | 0 | 1.680863  | -1.027543 | -2.303767 |
| 34 | 1 | 0 | 3.876416  | -0.530671 | -1.791145 |
| 35 | 1 | 0 | 1.069809  | -0.977995 | 1.434022  |
| 36 | 1 | 0 | 2.864373  | -0.580481 | 3.095814  |
| 37 | 1 | 0 | -1.810389 | 0.072326  | -1.919576 |
| 38 | 1 | 0 | -0.775090 | -0.934245 | -2.931316 |
| 39 | 1 | 0 | -1.975529 | -0.977358 | 0.642280  |
| 40 | 1 | 0 | -1.471152 | -3.137398 | -3.040289 |
| 41 | 1 | 0 | -2.516717 | -5.152557 | -2.038778 |
| 42 | 1 | 0 | 1.393666  | 1.466271  | -1.144894 |
| 43 | 1 | 0 | 0.591488  | 1.215995  | -2.694627 |
| 44 | 1 | 0 | -0.245119 | 2.051329  | 0.888401  |
| 45 | 1 | 0 | -1.165836 | 2.678255  | -3.255823 |
| 46 | 1 | 0 | -2.832081 | 4.413284  | -2.619638 |
| 47 | 1 | 0 | -3.422578 | 5.249199  | 0.772998  |
| 48 | 1 | 0 | -0.259291 | 3.513981  | 2.762506  |
| 49 | 1 | 0 | -1.725010 | 3.783840  | 3.743165  |
| 50 | 1 | 0 | -1.514832 | 2.240301  | 2.874149  |
| 51 | 1 | 0 | 5.839406  | 0.746961  | -2.051313 |
| 52 | 1 | 0 | 7.434272  | 0.146662  | -1.517005 |
| 53 | 1 | 0 | 6.165158  | -1.016948 | -1.992648 |
| 54 | 1 | 0 | -3.609661 | -1.068656 | 2.334174  |
| 55 | 1 | 0 | -3.486064 | -2.200817 | 3.709988  |
| 56 | 1 | 0 | -2.001124 | -1.626404 | 2.900664  |

3<sup>rd</sup> PA

Sum of electronic and thermal Enthalpies= -1435.087755

Frequencies -- 17.8242 19.0384 22.2191

| Center<br>Number | Atomic<br>Number | Atomic<br>Type | Coordinates (Angstroms) |           |           |
|------------------|------------------|----------------|-------------------------|-----------|-----------|
|                  |                  |                | X                       | Y         | Z         |
| 1                | 7                | 0              | 0.104368                | -0.073555 | -1.099779 |
| 2                | 6                | 0              | 1.168672                | -1.079299 | -1.234166 |
| 3                | 6                | 0              | 2.274926                | -0.916409 | -0.224503 |
| 4                | 6                | 0              | 3.603108                | -0.795178 | -0.643046 |
| 5                | 6                | 0              | 1.971650                | -0.926847 | 1.167188  |
| 6                | 6                | 0              | 4.630611                | -0.680860 | 0.287021  |
| 7                | 6                | 0              | 2.959803                | -0.815915 | 2.105010  |

|    |   |   |           |           |           |
|----|---|---|-----------|-----------|-----------|
| 8  | 6 | 0 | 4.345063  | -0.684865 | 1.727802  |
| 9  | 8 | 0 | 5.929803  | -0.555235 | -0.012127 |
| 10 | 8 | 0 | 5.272292  | -0.583258 | 2.574174  |
| 11 | 6 | 0 | -1.111164 | -0.480468 | -1.851286 |
| 12 | 6 | 0 | -1.789047 | -1.713464 | -1.312768 |
| 13 | 6 | 0 | -2.433857 | -1.688096 | -0.057849 |
| 14 | 6 | 0 | -1.814399 | -2.908102 | -2.034687 |
| 15 | 6 | 0 | -3.061869 | -2.813742 | 0.451910  |
| 16 | 6 | 0 | -2.445191 | -4.046381 | -1.530072 |
| 17 | 6 | 0 | -3.091534 | -4.063597 | -0.269196 |
| 18 | 8 | 0 | -3.677019 | -5.116335 | 0.219732  |
| 19 | 6 | 0 | 0.574006  | 1.242175  | -1.560848 |
| 20 | 6 | 0 | -0.324273 | 2.388963  | -1.164601 |
| 21 | 6 | 0 | -0.704096 | 2.562763  | 0.173450  |
| 22 | 6 | 0 | -0.743781 | 3.328456  | -2.144331 |
| 23 | 6 | 0 | -1.488573 | 3.643107  | 0.547289  |
| 24 | 6 | 0 | -1.519519 | 4.404822  | -1.806513 |
| 25 | 6 | 0 | -1.940210 | 4.628076  | -0.446922 |
| 26 | 8 | 0 | -2.654911 | 5.608478  | -0.111186 |
| 27 | 8 | 0 | -1.900189 | 3.904866  | 1.795374  |
| 28 | 6 | 0 | -1.521010 | 3.017068  | 2.863528  |
| 29 | 6 | 0 | 6.339579  | -0.539697 | -1.392413 |
| 30 | 8 | 0 | -3.709059 | -2.848243 | 1.669245  |
| 31 | 6 | 0 | -3.736436 | -1.658378 | 2.457241  |
| 32 | 1 | 0 | 0.706074  | -2.059698 | -1.074955 |
| 33 | 1 | 0 | 1.592175  | -1.087288 | -2.251496 |
| 34 | 1 | 0 | 3.821088  | -0.788008 | -1.703535 |
| 35 | 1 | 0 | 0.938423  | -1.034623 | 1.475907  |
| 36 | 1 | 0 | 2.738331  | -0.832467 | 3.166667  |
| 37 | 1 | 0 | -1.797280 | 0.371593  | -1.808372 |
| 38 | 1 | 0 | -0.863650 | -0.636833 | -2.914728 |
| 39 | 1 | 0 | -2.432944 | -0.765174 | 0.510070  |
| 40 | 1 | 0 | -1.331629 | -2.954488 | -3.007277 |
| 41 | 1 | 0 | -2.450937 | -4.967119 | -2.107223 |
| 42 | 1 | 0 | 1.558711  | 1.420367  | -1.114334 |
| 43 | 1 | 0 | 0.716242  | 1.254725  | -2.653551 |
| 44 | 1 | 0 | -0.373178 | 1.843524  | 0.910267  |
| 45 | 1 | 0 | -0.442169 | 3.178041  | -3.175432 |
| 46 | 1 | 0 | -1.848837 | 5.122765  | -2.549640 |
| 47 | 1 | 0 | -0.434149 | 2.987854  | 2.969104  |
| 48 | 1 | 0 | -1.970821 | 3.437202  | 3.760862  |
| 49 | 1 | 0 | -1.912576 | 2.013252  | 2.684165  |
| 50 | 1 | 0 | 5.891165  | 0.308042  | -1.915304 |
| 51 | 1 | 0 | 7.422120  | -0.432100 | -1.370126 |
| 52 | 1 | 0 | 6.067505  | -1.477030 | -1.883015 |
| 53 | 1 | 0 | -4.252189 | -0.845917 | 1.934957  |
| 54 | 1 | 0 | -4.288481 | -1.912734 | 3.362115  |
| 55 | 1 | 0 | -2.725670 | -1.335977 | 2.728213  |

-----  
3<sup>rd</sup> ETE (0,4)

Sum of electronic and thermal Enthalpies= -1434.927377  
Frequencies -- 13.3380 15.0782 16.7695  
-----

| Center<br>Number | Atomic<br>Number | Atomic<br>Type | Coordinates (Angstroms) |           |           |
|------------------|------------------|----------------|-------------------------|-----------|-----------|
|                  |                  |                | X                       | Y         | Z         |
| 1                | 7                | 0              | 0.096885                | -0.132541 | -1.167368 |
| 2                | 6                | 0              | 1.180237                | -1.122593 | -1.297234 |
| 3                | 6                | 0              | 2.282707                | -0.937696 | -0.282902 |
| 4                | 6                | 0              | 3.605691                | -0.789726 | -0.701847 |
| 5                | 6                | 0              | 1.975921                | -0.955722 | 1.108568  |
| 6                | 6                | 0              | 4.631032                | -0.654387 | 0.230428  |
| 7                | 6                | 0              | 2.959027                | -0.825248 | 2.047979  |
| 8                | 6                | 0              | 4.342561                | -0.665411 | 1.672007  |
| 9                | 8                | 0              | 5.924787                | -0.501917 | -0.066065 |
| 10               | 8                | 0              | 5.265031                | -0.544692 | 2.518394  |
| 11               | 6                | 0              | -1.095582               | -0.563679 | -1.919648 |
| 12               | 6                | 0              | -1.815460               | -1.736166 | -1.294182 |
| 13               | 6                | 0              | -2.302028               | -1.642958 | 0.015470  |
| 14               | 6                | 0              | -2.031664               | -2.921212 | -2.047964 |
| 15               | 6                | 0              | -2.992611               | -2.702704 | 0.585967  |
| 16               | 6                | 0              | -2.702853               | -3.986932 | -1.512264 |
| 17               | 6                | 0              | -3.219491               | -3.946964 | -0.167015 |
| 18               | 8                | 0              | -3.835223               | -4.913571 | 0.350049  |
| 19               | 6                | 0              | 0.547100                | 1.195000  | -1.623584 |
| 20               | 6                | 0              | -0.369038               | 2.321420  | -1.204598 |
| 21               | 6                | 0              | -0.641466               | 2.536260  | 0.152109  |
| 22               | 6                | 0              | -0.926761               | 3.185977  | -2.184785 |
| 23               | 6                | 0              | -1.457603               | 3.586119  | 0.547860  |
| 24               | 6                | 0              | -1.739287               | 4.227895  | -1.827758 |
| 25               | 6                | 0              | -2.058173               | 4.490017  | -0.446452 |
| 26               | 8                | 0              | -2.806130               | 5.436857  | -0.093171 |
| 27               | 8                | 0              | -1.770318               | 3.885312  | 1.813647  |
| 28               | 6                | 0              | -1.230835               | 3.084660  | 2.882804  |
| 29               | 6                | 0              | 6.340063                | -0.473330 | -1.445773 |
| 30               | 8                | 0              | -3.510165               | -2.712438 | 1.819316  |
| 31               | 6                | 0              | -3.370361               | -1.546715 | 2.653849  |
| 32               | 1                | 0              | 0.742936                | -2.113940 | -1.138710 |
| 33               | 1                | 0              | 1.605322                | -1.120049 | -2.312810 |
| 34               | 1                | 0              | 3.824381                | -0.777385 | -1.762045 |
| 35               | 1                | 0              | 0.944447                | -1.083880 | 1.415150  |
| 36               | 1                | 0              | 2.736947                | -0.846132 | 3.109316  |
| 37               | 1                | 0              | -1.790407               | 0.281533  | -1.950085 |
| 38               | 1                | 0              | -0.840722               | -0.805366 | -2.963023 |
| 39               | 1                | 0              | -2.139741               | -0.730603 | 0.573467  |
| 40               | 1                | 0              | -1.649668               | -2.972479 | -3.061824 |
| 41               | 1                | 0              | -2.866613               | -4.898069 | -2.077033 |
| 42               | 1                | 0              | 1.532013                | 1.378999  | -1.182944 |
| 43               | 1                | 0              | 0.677464                | 1.216447  | -2.716535 |
| 44               | 1                | 0              | -0.201082               | 1.877511  | 0.888450  |
| 45               | 1                | 0              | -0.702156               | 3.004263  | -3.230306 |
| 46               | 1                | 0              | -2.175015               | 4.888836  | -2.568871 |
| 47               | 1                | 0              | -0.139640               | 3.132479  | 2.881527  |
| 48               | 1                | 0              | -1.622232               | 3.524898  | 3.797543  |
| 49               | 1                | 0              | -1.567267               | 2.049538  | 2.792411  |
| 50               | 1                | 0              | 5.876676                | 0.367717  | -1.965988 |
| 51               | 1                | 0              | 7.419983                | -0.344561 | -1.417762 |

|    |   |   |           |           |           |
|----|---|---|-----------|-----------|-----------|
| 52 | 1 | 0 | 6.087738  | -1.414195 | -1.939748 |
| 53 | 1 | 0 | -3.859685 | -0.686356 | 2.192011  |
| 54 | 1 | 0 | -3.867326 | -1.800343 | 3.587961  |
| 55 | 1 | 0 | -2.315160 | -1.332885 | 2.837848  |

### S3.2 - Compound 2

2<sup>nd</sup> PA (-1,2)

Sum of electronic and thermal Enthalpies= -1664.754790

Frequencies -- 12.0172 17.0052 17.6699

| Center Number | Atomic Number | Atomic Type | Coordinates (Angstroms) |           |           |
|---------------|---------------|-------------|-------------------------|-----------|-----------|
|               |               |             | X                       | Y         | Z         |
| 1             | 7             | 0           | -0.041943               | 0.093583  | -1.192085 |
| 2             | 6             | 0           | 0.323369                | -1.332014 | -1.382855 |
| 3             | 6             | 0           | 1.565658                | -1.767304 | -0.641745 |
| 4             | 6             | 0           | 2.743332                | -2.078809 | -1.331466 |
| 5             | 6             | 0           | 1.556198                | -1.885297 | 0.755303  |
| 6             | 6             | 0           | 3.885563                | -2.488521 | -0.642961 |
| 7             | 6             | 0           | 2.697052                | -2.294310 | 1.440957  |
| 8             | 6             | 0           | 3.922003                | -2.614377 | 0.777090  |
| 9             | 8             | 0           | 5.080383                | -2.808488 | -1.266627 |
| 10            | 8             | 0           | 4.988659                | -2.997467 | 1.423388  |
| 11            | 6             | 0           | -1.396135               | 0.343986  | -1.704522 |
| 12            | 6             | 0           | -2.490898               | -0.256305 | -0.852992 |
| 13            | 6             | 0           | -2.553406               | 0.059071  | 0.520125  |
| 14            | 6             | 0           | -3.460620               | -1.081466 | -1.448107 |
| 15            | 6             | 0           | -3.570781               | -0.443687 | 1.302699  |
| 16            | 6             | 0           | -4.492916               | -1.602877 | -0.689604 |
| 17            | 6             | 0           | -4.604935               | -1.311376 | 0.738494  |
| 18            | 8             | 0           | -5.535762               | -1.777982 | 1.439273  |
| 19            | 6             | 0           | 0.936954                | 0.985577  | -1.844176 |
| 20            | 6             | 0           | 0.822712                | 2.434797  | -1.422147 |
| 21            | 6             | 0           | 1.161001                | 2.809849  | -0.110640 |
| 22            | 6             | 0           | 0.407056                | 3.420180  | -2.316448 |
| 23            | 6             | 0           | 1.075082                | 4.138003  | 0.289341  |
| 24            | 6             | 0           | 0.318989                | 4.759141  | -1.920937 |
| 25            | 6             | 0           | 0.647472                | 5.120875  | -0.624548 |
| 26            | 8             | 0           | 0.557701                | 6.435188  | -0.239336 |
| 27            | 8             | 0           | 1.381874                | 4.619459  | 1.534861  |
| 28            | 6             | 0           | 1.828084                | 3.695932  | 2.537044  |
| 29            | 6             | 0           | 5.144049                | -2.724602 | -2.689109 |
| 30            | 8             | 0           | -3.734244               | -0.205703 | 2.618078  |
| 31            | 6             | 0           | -2.786050               | 0.640538  | 3.289773  |
| 32            | 1             | 0           | -0.531730               | -1.919664 | -1.035687 |
| 33            | 1             | 0           | 0.442384                | -1.551829 | -2.457753 |
| 34            | 1             | 0           | 2.757474                | -1.996028 | -2.411525 |
| 35            | 1             | 0           | 0.646661                | -1.656869 | 1.297256  |
| 36            | 1             | 0           | -1.548256               | 1.428317  | -1.724777 |
| 37            | 1             | 0           | -1.504992               | -0.011096 | -2.742567 |
| 38            | 1             | 0           | -1.794942               | 0.702764  | 0.943224  |
| 39            | 1             | 0           | -3.382044               | -1.305144 | -2.503781 |
| 40            | 1             | 0           | 1.929205                | 0.615612  | -1.577396 |
| 41            | 1             | 0           | 0.855224                | 0.920090  | -2.942495 |

|    |   |   |           |           |           |
|----|---|---|-----------|-----------|-----------|
| 42 | 1 | 0 | 1.496222  | 2.054284  | 0.588709  |
| 43 | 1 | 0 | 0.148031  | 3.149643  | -3.334620 |
| 44 | 1 | 0 | -0.006157 | 5.526728  | -2.614822 |
| 45 | 1 | 0 | 0.824741  | 6.507743  | 0.689547  |
| 46 | 1 | 0 | 2.754596  | 3.204029  | 2.228727  |
| 47 | 1 | 0 | 2.010212  | 4.294320  | 3.428497  |
| 48 | 1 | 0 | 1.059028  | 2.947587  | 2.746665  |
| 49 | 1 | 0 | 4.960419  | -1.703345 | -3.039502 |
| 50 | 1 | 0 | 6.158000  | -3.019834 | -2.960215 |
| 51 | 1 | 0 | 4.430931  | -3.407134 | -3.163424 |
| 52 | 1 | 0 | -2.789226 | 1.643045  | 2.854719  |
| 53 | 1 | 0 | -3.119251 | 0.685082  | 4.324961  |
| 54 | 1 | 0 | -1.782707 | 0.210573  | 3.240401  |
| 55 | 8 | 0 | 2.753306  | -2.435557 | 2.816588  |
| 56 | 6 | 0 | 1.575095  | -2.163287 | 3.573553  |
| 57 | 1 | 0 | 0.754451  | -2.831150 | 3.291221  |
| 58 | 1 | 0 | 1.842062  | -2.342380 | 4.615344  |
| 59 | 1 | 0 | 1.255155  | -1.122510 | 3.457002  |
| 60 | 8 | 0 | -5.468286 | -2.406163 | -1.149548 |
| 61 | 6 | 0 | -5.469998 | -2.771387 | -2.540564 |
| 62 | 1 | 0 | -4.560544 | -3.321372 | -2.794468 |
| 63 | 1 | 0 | -6.339637 | -3.412759 | -2.670230 |
| 64 | 1 | 0 | -5.564342 | -1.884053 | -3.171195 |

-----

2<sup>nd</sup> ETE (0,3)

Sum of electronic and thermal Enthalpies= -1664.602956

Frequencies -- 10.8005 14.4657 18.9856

-----

| Center<br>Number | Atomic<br>Number | Atomic<br>Type | Coordinates (Angstroms) |           |           |
|------------------|------------------|----------------|-------------------------|-----------|-----------|
|                  |                  |                | X                       | Y         | Z         |
| 1                | 7                | 0              | -0.020051               | 0.063890  | -1.204579 |
| 2                | 6                | 0              | 0.386971                | -1.341450 | -1.376969 |
| 3                | 6                | 0              | 1.624780                | -1.716078 | -0.593364 |
| 4                | 6                | 0              | 2.736845                | -2.247315 | -1.267368 |
| 5                | 6                | 0              | 1.630065                | -1.563779 | 0.808460  |
| 6                | 6                | 0              | 3.865818                | -2.623034 | -0.561337 |
| 7                | 6                | 0              | 2.736389                | -1.935780 | 1.542438  |
| 8                | 6                | 0              | 3.926963                | -2.487918 | 0.893629  |
| 9                | 8                | 0              | 4.988582                | -3.127005 | -1.099485 |
| 10               | 8                | 0              | 4.940824                | -2.828259 | 1.548422  |
| 11               | 6                | 0              | -1.389793               | 0.266448  | -1.702688 |
| 12               | 6                | 0              | -2.450819               | -0.356685 | -0.824870 |
| 13               | 6                | 0              | -2.524116               | 0.004753  | 0.536320  |
| 14               | 6                | 0              | -3.373722               | -1.255129 | -1.385114 |
| 15               | 6                | 0              | -3.506635               | -0.527733 | 1.343643  |
| 16               | 6                | 0              | -4.372514               | -1.806437 | -0.602251 |
| 17               | 6                | 0              | -4.490446               | -1.475225 | 0.817331  |
| 18               | 8                | 0              | -5.385066               | -1.973353 | 1.541426  |
| 19               | 6                | 0              | 0.931595                | 0.966535  | -1.888821 |
| 20               | 6                | 0              | 0.761637                | 2.426548  | -1.530951 |
| 21               | 6                | 0              | 1.048892                | 2.870144  | -0.228696 |
| 22               | 6                | 0              | 0.347663                | 3.357004  | -2.482947 |

|    |   |   |           |           |           |
|----|---|---|-----------|-----------|-----------|
| 23 | 6 | 0 | 0.916800  | 4.212736  | 0.105173  |
| 24 | 6 | 0 | 0.215285  | 4.709794  | -2.154577 |
| 25 | 6 | 0 | 0.496072  | 5.140484  | -0.867955 |
| 26 | 8 | 0 | 0.365724  | 6.468668  | -0.551539 |
| 27 | 8 | 0 | 1.170078  | 4.759230  | 1.335210  |
| 28 | 6 | 0 | 1.624422  | 3.898768  | 2.388258  |
| 29 | 6 | 0 | 5.058113  | -3.306928 | -2.525101 |
| 30 | 8 | 0 | -3.679409 | -0.252209 | 2.649493  |
| 31 | 6 | 0 | -2.786184 | 0.678415  | 3.284206  |
| 32 | 1 | 0 | -0.436607 | -1.970359 | -1.023816 |
| 33 | 1 | 0 | 0.540393  | -1.582982 | -2.440607 |
| 34 | 1 | 0 | 2.697695  | -2.349670 | -2.343661 |
| 35 | 1 | 0 | 0.753207  | -1.159817 | 1.295077  |
| 36 | 1 | 0 | -1.571394 | 1.345278  | -1.734937 |
| 37 | 1 | 0 | -1.500217 | -0.107037 | -2.733147 |
| 38 | 1 | 0 | -1.804480 | 0.708855  | 0.930115  |
| 39 | 1 | 0 | -3.288018 | -1.510421 | -2.432955 |
| 40 | 1 | 0 | 1.936858  | 0.645050  | -1.603955 |
| 41 | 1 | 0 | 0.857389  | 0.850426  | -2.982559 |
| 42 | 1 | 0 | 1.382423  | 2.158030  | 0.515402  |
| 43 | 1 | 0 | 0.126062  | 3.032214  | -3.493942 |
| 44 | 1 | 0 | -0.106493 | 5.435435  | -2.893569 |
| 45 | 1 | 0 | 0.613235  | 6.596592  | 0.376737  |
| 46 | 1 | 0 | 2.576584  | 3.430341  | 2.124562  |
| 47 | 1 | 0 | 1.760426  | 4.542332  | 3.256086  |
| 48 | 1 | 0 | 0.878823  | 3.131216  | 2.612810  |
| 49 | 1 | 0 | 4.948218  | -2.348916 | -3.038955 |
| 50 | 1 | 0 | 6.046937  | -3.719198 | -2.716353 |
| 51 | 1 | 0 | 4.290894  | -4.008252 | -2.861577 |
| 52 | 1 | 0 | -2.854944 | 1.660871  | 2.810716  |
| 53 | 1 | 0 | -3.119473 | 0.741161  | 4.318363  |
| 54 | 1 | 0 | -1.757614 | 0.311657  | 3.246574  |
| 55 | 8 | 0 | 2.851476  | -1.849641 | 2.880230  |
| 56 | 6 | 0 | 1.739046  | -1.346970 | 3.639722  |
| 57 | 1 | 0 | 0.861712  | -1.984034 | 3.503406  |
| 58 | 1 | 0 | 2.060633  | -1.376484 | 4.679030  |
| 59 | 1 | 0 | 1.508389  | -0.318713 | 3.350770  |
| 60 | 8 | 0 | -5.304807 | -2.674321 | -1.028395 |
| 61 | 6 | 0 | -5.301042 | -3.077626 | -2.409315 |
| 62 | 1 | 0 | -4.368957 | -3.591414 | -2.656621 |
| 63 | 1 | 0 | -6.140550 | -3.762368 | -2.512607 |
| 64 | 1 | 0 | -5.442516 | -2.213142 | -3.062352 |

-----

3<sup>rd</sup> PA (-1,3)

Sum of electronic and thermal Enthalpies= -1664.138477

Frequencies -- 11.3151 16.4248 18.2574

-----

| Center<br>Number | Atomic<br>Number | Atomic<br>Type | Coordinates (Angstroms) |           |           |
|------------------|------------------|----------------|-------------------------|-----------|-----------|
|                  |                  |                | X                       | Y         | Z         |
| 1                | 7                | 0              | -0.004429               | 0.082727  | -1.157784 |
| 2                | 6                | 0              | 0.500693                | -1.286639 | -1.349127 |
| 3                | 6                | 0              | 1.770299                | -1.579725 | -0.582718 |

-----

|    |   |   |           |           |           |
|----|---|---|-----------|-----------|-----------|
| 4  | 6 | 0 | 2.901591  | -2.052023 | -1.269761 |
| 5  | 6 | 0 | 1.788732  | -1.417719 | 0.817873  |
| 6  | 6 | 0 | 4.059829  | -2.357440 | -0.578395 |
| 7  | 6 | 0 | 2.925463  | -1.720687 | 1.536821  |
| 8  | 6 | 0 | 4.136057  | -2.207220 | 0.873800  |
| 9  | 8 | 0 | 5.201448  | -2.802760 | -1.131072 |
| 10 | 8 | 0 | 5.178960  | -2.482648 | 1.514758  |
| 11 | 6 | 0 | -1.379306 | 0.199126  | -1.665640 |
| 12 | 6 | 0 | -2.405036 | -0.498467 | -0.804221 |
| 13 | 6 | 0 | -2.509004 | -0.160999 | 0.561376  |
| 14 | 6 | 0 | -3.269733 | -1.444092 | -1.380921 |
| 15 | 6 | 0 | -3.463116 | -0.761463 | 1.354693  |
| 16 | 6 | 0 | -4.238746 | -2.063053 | -0.611965 |
| 17 | 6 | 0 | -4.386064 | -1.757511 | 0.809924  |
| 18 | 8 | 0 | -5.256040 | -2.316343 | 1.521239  |
| 19 | 6 | 0 | 0.893237  | 1.062165  | -1.819626 |
| 20 | 6 | 0 | 0.589580  | 2.504755  | -1.501829 |
| 21 | 6 | 0 | 0.800978  | 3.014638  | -0.203271 |
| 22 | 6 | 0 | 0.121489  | 3.384900  | -2.477351 |
| 23 | 6 | 0 | 0.546683  | 4.343682  | 0.100055  |
| 24 | 6 | 0 | -0.134070 | 4.725976  | -2.181209 |
| 25 | 6 | 0 | 0.062256  | 5.273172  | -0.890067 |
| 26 | 8 | 0 | -0.166301 | 6.522351  | -0.600585 |
| 27 | 8 | 0 | 0.736906  | 4.895859  | 1.351461  |
| 28 | 6 | 0 | 1.233535  | 4.057218  | 2.393799  |
| 29 | 6 | 0 | 5.256036  | -2.992095 | -2.555698 |
| 30 | 8 | 0 | -3.658726 | -0.513613 | 2.663885  |
| 31 | 6 | 0 | -2.821701 | 0.456747  | 3.315650  |
| 32 | 1 | 0 | -0.270947 | -1.978867 | -0.995965 |
| 33 | 1 | 0 | 0.661581  | -1.505537 | -2.417144 |
| 34 | 1 | 0 | 2.852757  | -2.164776 | -2.344660 |
| 35 | 1 | 0 | 0.898245  | -1.059636 | 1.315417  |
| 36 | 1 | 0 | -1.625017 | 1.266000  | -1.689077 |
| 37 | 1 | 0 | -1.458036 | -0.169481 | -2.701204 |
| 38 | 1 | 0 | -1.835915 | 0.579991  | 0.969556  |
| 39 | 1 | 0 | -3.162897 | -1.681051 | -2.431249 |
| 40 | 1 | 0 | 1.908426  | 0.817320  | -1.492369 |
| 41 | 1 | 0 | 0.869580  | 0.919302  | -2.913388 |
| 42 | 1 | 0 | 1.174522  | 2.347054  | 0.564241  |
| 43 | 1 | 0 | -0.046085 | 3.022550  | -3.488306 |
| 44 | 1 | 0 | -0.496856 | 5.394648  | -2.957380 |
| 45 | 1 | 0 | 2.225044  | 3.661720  | 2.149483  |
| 46 | 1 | 0 | 1.306020  | 4.691026  | 3.277760  |
| 47 | 1 | 0 | 0.549592  | 3.227035  | 2.598940  |
| 48 | 1 | 0 | 5.081659  | -2.047154 | -3.076059 |
| 49 | 1 | 0 | 6.263487  | -3.348459 | -2.761796 |
| 50 | 1 | 0 | 4.524706  | -3.739542 | -2.872465 |
| 51 | 1 | 0 | -2.941864 | 1.440182  | 2.854653  |
| 52 | 1 | 0 | -3.163189 | 0.487432  | 4.348613  |
| 53 | 1 | 0 | -1.774102 | 0.148062  | 3.279344  |
| 54 | 8 | 0 | 3.054273  | -1.619355 | 2.872954  |
| 55 | 6 | 0 | 1.925784  | -1.174994 | 3.644775  |
| 56 | 1 | 0 | 1.084634  | -1.862515 | 3.526272  |
| 57 | 1 | 0 | 2.263172  | -1.177342 | 4.679518  |

|    |   |   |           |           |           |
|----|---|---|-----------|-----------|-----------|
| 58 | 1 | 0 | 1.632196  | -0.164043 | 3.351905  |
| 59 | 8 | 0 | -5.115533 | -2.980395 | -1.056070 |
| 60 | 6 | 0 | -5.077809 | -3.363789 | -2.441657 |
| 61 | 1 | 0 | -4.116016 | -3.820185 | -2.688165 |
| 62 | 1 | 0 | -5.875756 | -4.094115 | -2.561566 |
| 63 | 1 | 0 | -5.263778 | -2.500248 | -3.084861 |

-----

3<sup>rd</sup> ETE (0,4)

Sum of electronic and thermal Enthalpies= -1663.978621  
 Frequencies -- 12.3754 17.2906 21.0478

| Center<br>Number | Atomic<br>Number | Atomic<br>Type | Coordinates (Angstroms) |           |           |
|------------------|------------------|----------------|-------------------------|-----------|-----------|
|                  |                  |                | X                       | Y         | Z         |
| 1                | 7                | 0              | 0.009379                | 0.105211  | -1.208527 |
| 2                | 6                | 0              | 0.411469                | -1.305042 | -1.360820 |
| 3                | 6                | 0              | 1.642918                | -1.670438 | -0.562788 |
| 4                | 6                | 0              | 2.769941                | -2.184567 | -1.224516 |
| 5                | 6                | 0              | 1.628813                | -1.519774 | 0.839147  |
| 6                | 6                | 0              | 3.896541                | -2.543461 | -0.505270 |
| 7                | 6                | 0              | 2.731997                | -1.875477 | 1.586029  |
| 8                | 6                | 0              | 3.939069                | -2.406909 | 0.950365  |
| 9                | 8                | 0              | 5.032277                | -3.030785 | -1.030073 |
| 10               | 8                | 0              | 4.951158                | -2.729528 | 1.616231  |
| 11               | 6                | 0              | -1.355512               | 0.314450  | -1.724256 |
| 12               | 6                | 0              | -2.430271               | -0.318649 | -0.869545 |
| 13               | 6                | 0              | -2.535495               | 0.038915  | 0.490270  |
| 14               | 6                | 0              | -3.332109               | -1.223977 | -1.452123 |
| 15               | 6                | 0              | -3.530325               | -0.504715 | 1.275363  |
| 16               | 6                | 0              | -4.342964               | -1.785901 | -0.692286 |
| 17               | 6                | 0              | -4.494484               | -1.459093 | 0.725259  |
| 18               | 8                | 0              | -5.399871               | -1.966813 | 1.428427  |
| 19               | 6                | 0              | 0.961371                | 0.994099  | -1.896512 |
| 20               | 6                | 0              | 0.826168                | 2.449402  | -1.512651 |
| 21               | 6                | 0              | 0.886226                | 2.832846  | -0.167252 |
| 22               | 6                | 0              | 0.683531                | 3.437325  | -2.524387 |
| 23               | 6                | 0              | 0.805753                | 4.172043  | 0.186602  |
| 24               | 6                | 0              | 0.597863                | 4.766110  | -2.208195 |
| 25               | 6                | 0              | 0.650772                | 5.215279  | -0.839483 |
| 26               | 8                | 0              | 0.571832                | 6.429512  | -0.522437 |
| 27               | 8                | 0              | 0.863842                | 4.643718  | 1.437229  |
| 28               | 6                | 0              | 1.030955                | 3.721606  | 2.531145  |
| 29               | 6                | 0              | 5.120123                | -3.213227 | -2.454495 |
| 30               | 8                | 0              | -3.732859               | -0.235267 | 2.577614  |
| 31               | 6                | 0              | -2.858082               | 0.696503  | 3.235984  |
| 32               | 1                | 0              | -0.418248               | -1.923300 | -1.004478 |
| 33               | 1                | 0              | 0.570661                | -1.560599 | -2.419862 |
| 34               | 1                | 0              | 2.744415                | -2.288077 | -2.301129 |
| 35               | 1                | 0              | 0.739968                | -1.130735 | 1.316219  |
| 36               | 1                | 0              | -1.536473               | 1.393932  | -1.748674 |
| 37               | 1                | 0              | -1.448520               | -0.048943 | -2.759495 |
| 38               | 1                | 0              | -1.831645               | 0.748992  | 0.901434  |
| 39               | 1                | 0              | -3.221214               | -1.476356 | -2.498340 |



|    |   |   |           |           |           |
|----|---|---|-----------|-----------|-----------|
| 40 | 1 | 0 | 1.971861  | 0.669820  | -1.627207 |
| 41 | 1 | 0 | 0.877689  | 0.895894  | -2.990226 |
| 42 | 1 | 0 | 1.005510  | 2.072871  | 0.592961  |
| 43 | 1 | 0 | 0.638616  | 3.120941  | -3.560889 |
| 44 | 1 | 0 | 0.482875  | 5.525981  | -2.973281 |
| 45 | 1 | 0 | 1.970343  | 3.173926  | 2.427941  |
| 46 | 1 | 0 | 1.055397  | 4.338795  | 3.426848  |
| 47 | 1 | 0 | 0.188351  | 3.028215  | 2.577889  |
| 48 | 1 | 0 | 5.002412  | -2.258040 | -2.971837 |
| 49 | 1 | 0 | 6.116761  | -3.611828 | -2.633595 |
| 50 | 1 | 0 | 4.366617  | -3.926150 | -2.797266 |
| 51 | 1 | 0 | -2.921058 | 1.680907  | 2.765745  |
| 52 | 1 | 0 | -3.214096 | 0.752833  | 4.262872  |
| 53 | 1 | 0 | -1.827399 | 0.334108  | 3.219026  |
| 54 | 8 | 0 | 2.829929  | -1.789781 | 2.924905  |
| 55 | 6 | 0 | 1.701868  | -1.303608 | 3.672063  |
| 56 | 1 | 0 | 0.835287  | -1.952902 | 3.525303  |
| 57 | 1 | 0 | 2.012026  | -1.329507 | 4.714918  |
| 58 | 1 | 0 | 1.460367  | -0.278392 | 3.381235  |
| 59 | 8 | 0 | -5.257652 | -2.660837 | -1.139988 |
| 60 | 6 | 0 | -5.218811 | -3.064284 | -2.520414 |
| 61 | 1 | 0 | -4.277740 | -3.571904 | -2.745312 |
| 62 | 1 | 0 | -6.051035 | -3.754653 | -2.643047 |
| 63 | 1 | 0 | -5.350587 | -2.200809 | -3.176731 |

### S3.3 - Compound 3

2<sup>nd</sup> PA (-1,2)

Sum of electronic and thermal Enthalpies= -1615.784954

Frequencies -- 10.0532 11.9368 13.6666

| Center Number | Atomic Number | Atomic Type | Coordinates (Angstroms) |           |           |
|---------------|---------------|-------------|-------------------------|-----------|-----------|
|               |               |             | X                       | Y         | Z         |
| 1             | 7             | 0           | 0.030926                | 0.074611  | -1.196515 |
| 2             | 6             | 0           | 1.091372                | -0.922186 | -1.377821 |
| 3             | 6             | 0           | 2.187138                | -0.812280 | -0.353648 |
| 4             | 6             | 0           | 3.539702                | -0.776920 | -0.761540 |
| 5             | 6             | 0           | 1.886449                | -0.787638 | 1.030708  |
| 6             | 6             | 0           | 4.548162                | -0.736982 | 0.165382  |
| 7             | 6             | 0           | 2.880252                | -0.729170 | 1.969105  |
| 8             | 6             | 0           | 4.286377                | -0.691181 | 1.605466  |
| 9             | 8             | 0           | 5.178557                | -0.587366 | 2.469637  |
| 10            | 6             | 0           | -1.182801               | -0.304229 | -1.950188 |
| 11            | 6             | 0           | -1.866643               | -1.546546 | -1.423772 |
| 12            | 6             | 0           | -2.436451               | -1.572422 | -0.172136 |
| 13            | 6             | 0           | -1.964650               | -2.722463 | -2.217796 |
| 14            | 6             | 0           | -3.090293               | -2.722555 | 0.331298  |
| 15            | 6             | 0           | -2.598388               | -3.848415 | -1.765506 |
| 16            | 6             | 0           | -3.209896               | -3.941077 | -0.460356 |
| 17            | 8             | 0           | -3.780979               | -5.012098 | -0.097348 |
| 18            | 6             | 0           | 0.510297                | 1.415926  | -1.594617 |
| 19            | 6             | 0           | -0.406862               | 2.545547  | -1.180176 |
| 20            | 6             | 0           | -0.655759               | 2.789453  | 0.181093  |

|    |   |   |           |           |           |
|----|---|---|-----------|-----------|-----------|
| 21 | 6 | 0 | -0.991975 | 3.379495  | -2.131679 |
| 22 | 6 | 0 | -1.477537 | 3.840061  | 0.570996  |
| 23 | 6 | 0 | -1.816264 | 4.441177  | -1.746089 |
| 24 | 6 | 0 | -2.063213 | 4.673290  | -0.402504 |
| 25 | 8 | 0 | -2.874212 | 5.714597  | -0.029292 |
| 26 | 8 | 0 | -1.789814 | 4.173195  | 1.862126  |
| 27 | 6 | 0 | -1.254151 | 3.375616  | 2.926757  |
| 28 | 1 | 0 | 0.639843  | -1.915293 | -1.260405 |
| 29 | 1 | 0 | 1.524082  | -0.887517 | -2.389945 |
| 30 | 1 | 0 | 3.781891  | -0.799072 | -1.817442 |
| 31 | 1 | 0 | 0.849654  | -0.821528 | 1.342059  |
| 32 | 1 | 0 | 2.658308  | -0.705023 | 3.029908  |
| 33 | 1 | 0 | -1.869666 | 0.542651  | -1.887899 |
| 34 | 1 | 0 | -0.948599 | -0.445943 | -3.018388 |
| 35 | 1 | 0 | -2.392826 | -0.695816 | 0.459873  |
| 36 | 1 | 0 | -1.524723 | -2.722115 | -3.211313 |
| 37 | 1 | 0 | -2.662712 | -4.735551 | -2.387208 |
| 38 | 1 | 0 | 1.487489  | 1.561101  | -1.123988 |
| 39 | 1 | 0 | 0.672611  | 1.463365  | -2.683850 |
| 40 | 1 | 0 | -0.200860 | 2.152838  | 0.928995  |
| 41 | 1 | 0 | -0.809551 | 3.204826  | -3.186666 |
| 42 | 1 | 0 | -2.274197 | 5.089948  | -2.484797 |
| 43 | 1 | 0 | -2.949730 | 5.723119  | 0.936915  |
| 44 | 1 | 0 | -0.161400 | 3.415588  | 2.931091  |
| 45 | 1 | 0 | -1.640331 | 3.814337  | 3.845552  |
| 46 | 1 | 0 | -1.591253 | 2.338891  | 2.843835  |
| 47 | 7 | 0 | 5.921983  | -0.729478 | -0.321009 |
| 48 | 8 | 0 | 6.771327  | -1.335028 | 0.324995  |
| 49 | 8 | 0 | 6.162765  | -0.124687 | -1.365474 |
| 50 | 7 | 0 | -3.625465 | -2.630597 | 1.639119  |
| 51 | 8 | 0 | -3.492223 | -1.562989 | 2.286282  |
| 52 | 8 | 0 | -4.221586 | -3.598071 | 2.152155  |

-----

2<sup>nd</sup> ETE (0,3)

Sum of electronic and thermal Enthalpies= -1615.595932  
 Frequencies -- 9.9497 12.4710 14.6275

-----

| Center<br>Number | Atomic<br>Number | Atomic<br>Type | Coordinates (Angstroms) |           |           |
|------------------|------------------|----------------|-------------------------|-----------|-----------|
|                  |                  |                | X                       | Y         | Z         |
| 1                | 7                | 0              | -0.006753               | 0.143278  | -1.311338 |
| 2                | 6                | 0              | 1.266350                | -0.547580 | -1.535031 |
| 3                | 6                | 0              | 2.308244                | -0.260996 | -0.487202 |
| 4                | 6                | 0              | 3.663765                | -0.142116 | -0.873338 |
| 5                | 6                | 0              | 1.972928                | -0.169199 | 0.884418  |
| 6                | 6                | 0              | 4.641888                | 0.037794  | 0.067166  |
| 7                | 6                | 0              | 2.937125                | 0.032226  | 1.835246  |
| 8                | 6                | 0              | 4.343742                | 0.157661  | 1.495705  |
| 9                | 8                | 0              | 5.205206                | 0.390720  | 2.365577  |
| 10               | 6                | 0              | -1.086288               | -0.485252 | -2.075783 |
| 11               | 6                | 0              | -1.542511               | -1.796111 | -1.497770 |
| 12               | 6                | 0              | -1.737851               | -1.926668 | -0.100630 |
| 13               | 6                | 0              | -1.832359               | -2.894777 | -2.337110 |

|    |   |   |           |           |           |
|----|---|---|-----------|-----------|-----------|
| 14 | 6 | 0 | -2.219373 | -3.093267 | 0.426271  |
| 15 | 6 | 0 | -2.294884 | -4.078224 | -1.822529 |
| 16 | 6 | 0 | -2.515668 | -4.266104 | -0.399698 |
| 17 | 8 | 0 | -2.887195 | -5.363417 | 0.060110  |
| 18 | 6 | 0 | 0.118977  | 1.585826  | -1.628172 |
| 19 | 6 | 0 | -1.056932 | 2.415301  | -1.168274 |
| 20 | 6 | 0 | -1.300289 | 2.591493  | 0.204581  |
| 21 | 6 | 0 | -1.902967 | 3.033451  | -2.088880 |
| 22 | 6 | 0 | -2.370199 | 3.364712  | 0.637415  |
| 23 | 6 | 0 | -2.980536 | 3.813946  | -1.660307 |
| 24 | 6 | 0 | -3.218720 | 3.980988  | -0.305336 |
| 25 | 8 | 0 | -4.275999 | 4.747200  | 0.108421  |
| 26 | 8 | 0 | -2.701728 | 3.611084  | 1.941681  |
| 27 | 6 | 0 | -1.888928 | 3.042342  | 2.977622  |
| 28 | 1 | 0 | 1.082245  | -1.629305 | -1.509139 |
| 29 | 1 | 0 | 1.679725  | -0.330063 | -2.532106 |
| 30 | 1 | 0 | 3.931975  | -0.211339 | -1.921021 |
| 31 | 1 | 0 | 0.934633  | -0.263196 | 1.175944  |
| 32 | 1 | 0 | 2.688217  | 0.111627  | 2.887318  |
| 33 | 1 | 0 | -1.949187 | 0.192941  | -2.059156 |
| 34 | 1 | 0 | -0.820574 | -0.622481 | -3.135255 |
| 35 | 1 | 0 | -1.529367 | -1.085482 | 0.547353  |
| 36 | 1 | 0 | -1.676045 | -2.794672 | -3.405520 |
| 37 | 1 | 0 | -2.499387 | -4.932134 | -2.458096 |
| 38 | 1 | 0 | 1.026914  | 1.940720  | -1.132773 |
| 39 | 1 | 0 | 0.266219  | 1.729301  | -2.710072 |
| 40 | 1 | 0 | -0.643493 | 2.123523  | 0.926656  |
| 41 | 1 | 0 | -1.725108 | 2.910897  | -3.151840 |
| 42 | 1 | 0 | -3.640451 | 4.295594  | -2.373437 |
| 43 | 1 | 0 | -4.295362 | 4.764110  | 1.077477  |
| 44 | 1 | 0 | -0.860573 | 3.407430  | 2.909074  |
| 45 | 1 | 0 | -2.333843 | 3.372757  | 3.914888  |
| 46 | 1 | 0 | -1.903603 | 1.950217  | 2.927872  |
| 47 | 7 | 0 | 6.023498  | 0.124374  | -0.391823 |
| 48 | 8 | 0 | 6.897966  | -0.383782 | 0.301835  |
| 49 | 8 | 0 | 6.242986  | 0.693372  | -1.460058 |
| 50 | 7 | 0 | -2.439978 | -3.151186 | 1.867261  |
| 51 | 8 | 0 | -1.654651 | -2.546862 | 2.596873  |
| 52 | 8 | 0 | -3.402009 | -3.788112 | 2.283429  |

-----

3<sup>rd</sup> PA (-1,3)

Sum of electronic and thermal Enthalpies= -1615.161551  
 Frequencies -- 13.2360 13.8531 18.0198

-----

| Center<br>Number | Atomic<br>Number | Atomic<br>Type | Coordinates (Angstroms) |           |           |
|------------------|------------------|----------------|-------------------------|-----------|-----------|
|                  |                  |                | X                       | Y         | Z         |
| 1                | 7                | 0              | 0.085861                | 0.158556  | -1.239374 |
| 2                | 6                | 0              | 1.133702                | -0.854103 | -1.404216 |
| 3                | 6                | 0              | 2.195141                | -0.785115 | -0.340332 |
| 4                | 6                | 0              | 3.561750                | -0.811612 | -0.699283 |
| 5                | 6                | 0              | 1.845503                | -0.738410 | 1.031415  |
| 6                | 6                | 0              | 4.536223                | -0.810645 | 0.264103  |

-----

|    |   |   |           |           |           |
|----|---|---|-----------|-----------|-----------|
| 7  | 6 | 0 | 2.806061  | -0.718568 | 2.005797  |
| 8  | 6 | 0 | 4.224649  | -0.745010 | 1.693420  |
| 9  | 8 | 0 | 5.088985  | -0.676281 | 2.588713  |
| 10 | 6 | 0 | -1.117324 | -0.186996 | -2.029232 |
| 11 | 6 | 0 | -1.847326 | -1.410847 | -1.525858 |
| 12 | 6 | 0 | -2.436445 | -1.426649 | -0.282798 |
| 13 | 6 | 0 | -1.975842 | -2.575057 | -2.332493 |
| 14 | 6 | 0 | -3.142766 | -2.553188 | 0.198885  |
| 15 | 6 | 0 | -2.659632 | -3.679350 | -1.900368 |
| 16 | 6 | 0 | -3.296985 | -3.759122 | -0.606230 |
| 17 | 8 | 0 | -3.916308 | -4.808984 | -0.263066 |
| 18 | 6 | 0 | 0.580433  | 1.492384  | -1.603850 |
| 19 | 6 | 0 | -0.276909 | 2.632097  | -1.105412 |
| 20 | 6 | 0 | -0.879478 | 2.582857  | 0.156359  |
| 21 | 6 | 0 | -0.417791 | 3.794925  | -1.912596 |
| 22 | 6 | 0 | -1.615820 | 3.661955  | 0.626014  |
| 23 | 6 | 0 | -1.137019 | 4.874063  | -1.477959 |
| 24 | 6 | 0 | -1.781032 | 4.875773  | -0.188200 |
| 25 | 8 | 0 | -2.451796 | 5.853573  | 0.232167  |
| 26 | 8 | 0 | -2.224714 | 3.719163  | 1.816008  |
| 27 | 6 | 0 | -2.133230 | 2.596030  | 2.713909  |
| 28 | 1 | 0 | 0.658140  | -1.839677 | -1.322061 |
| 29 | 1 | 0 | 1.600299  | -0.810220 | -2.400354 |
| 30 | 1 | 0 | 3.841428  | -0.850954 | -1.745327 |
| 31 | 1 | 0 | 0.797610  | -0.724338 | 1.304323  |
| 32 | 1 | 0 | 2.546968  | -0.678306 | 3.057627  |
| 33 | 1 | 0 | -1.783564 | 0.678530  | -1.983462 |
| 34 | 1 | 0 | -0.855337 | -0.330197 | -3.090031 |
| 35 | 1 | 0 | -2.369049 | -0.558184 | 0.357556  |
| 36 | 1 | 0 | -1.520099 | -2.582894 | -3.318762 |
| 37 | 1 | 0 | -2.747482 | -4.558244 | -2.530763 |
| 38 | 1 | 0 | 1.576745  | 1.617289  | -1.162746 |
| 39 | 1 | 0 | 0.712931  | 1.589072  | -2.693461 |
| 40 | 1 | 0 | -0.763346 | 1.692340  | 0.757992  |
| 41 | 1 | 0 | 0.053338  | 3.813205  | -2.889672 |
| 42 | 1 | 0 | -1.253709 | 5.762041  | -2.089454 |
| 43 | 1 | 0 | -1.091190 | 2.401824  | 2.977268  |
| 44 | 1 | 0 | -2.692373 | 2.890395  | 3.599697  |
| 45 | 1 | 0 | -2.585663 | 1.708914  | 2.265418  |
| 46 | 7 | 0 | 5.926284  | -0.865404 | -0.170942 |
| 47 | 8 | 0 | 6.723564  | -1.504137 | 0.508148  |
| 48 | 8 | 0 | 6.231421  | -0.276113 | -1.207401 |
| 49 | 7 | 0 | -3.695361 | -2.449822 | 1.499251  |
| 50 | 8 | 0 | -3.524265 | -1.395735 | 2.159293  |
| 51 | 8 | 0 | -4.344175 | -3.393534 | 1.990789  |

-----

3<sup>rd</sup> ETE (0,4)

Sum of electronic and thermal Enthalpies= -1614.971377  
 Frequencies -- 12.9372 17.7792 19.4755

-----

| Center Number | Atomic Number | Atomic Type | Coordinates (Angstroms) |   |   |
|---------------|---------------|-------------|-------------------------|---|---|
|               |               |             | X                       | Y | Z |

-----

|    |   |   |           |           |           |
|----|---|---|-----------|-----------|-----------|
| 1  | 7 | 0 | -0.049282 | 0.378785  | -1.380976 |
| 2  | 6 | 0 | 1.269155  | -0.214275 | -1.605223 |
| 3  | 6 | 0 | 2.272471  | 0.063250  | -0.517929 |
| 4  | 6 | 0 | 3.650771  | -0.006157 | -0.837661 |
| 5  | 6 | 0 | 1.889027  | 0.339396  | 0.813252  |
| 6  | 6 | 0 | 4.598785  | 0.166620  | 0.132207  |
| 7  | 6 | 0 | 2.828162  | 0.539314  | 1.791373  |
| 8  | 6 | 0 | 4.253291  | 0.473081  | 1.521836  |
| 9  | 8 | 0 | 5.096094  | 0.705866  | 2.410102  |
| 10 | 6 | 0 | -1.079039 | -0.295217 | -2.171912 |
| 11 | 6 | 0 | -1.504294 | -1.633062 | -1.629605 |
| 12 | 6 | 0 | -1.405283 | -1.926486 | -0.249901 |
| 13 | 6 | 0 | -2.063924 | -2.597797 | -2.500939 |
| 14 | 6 | 0 | -1.867386 | -3.117994 | 0.239219  |
| 15 | 6 | 0 | -2.510895 | -3.802936 | -2.030074 |
| 16 | 6 | 0 | -2.438432 | -4.155086 | -0.622626 |
| 17 | 8 | 0 | -2.798877 | -5.275508 | -0.213162 |
| 18 | 6 | 0 | -0.037636 | 1.825076  | -1.624628 |
| 19 | 6 | 0 | -1.167769 | 2.591735  | -0.980398 |
| 20 | 6 | 0 | -1.840194 | 2.110717  | 0.145387  |
| 21 | 6 | 0 | -1.505172 | 3.865764  | -1.519596 |
| 22 | 6 | 0 | -2.836793 | 2.872148  | 0.745604  |
| 23 | 6 | 0 | -2.476335 | 4.639121  | -0.948569 |
| 24 | 6 | 0 | -3.201428 | 4.194139  | 0.215726  |
| 25 | 8 | 0 | -4.100574 | 4.885358  | 0.759707  |
| 26 | 8 | 0 | -3.539867 | 2.506349  | 1.822376  |
| 27 | 6 | 0 | -3.280043 | 1.231552  | 2.441030  |
| 28 | 1 | 0 | 1.157771  | -1.305093 | -1.661435 |
| 29 | 1 | 0 | 1.695284  | 0.089481  | -2.575048 |
| 30 | 1 | 0 | 3.955350  | -0.214236 | -1.856791 |
| 31 | 1 | 0 | 0.834909  | 0.395575  | 1.052497  |
| 32 | 1 | 0 | 2.542553  | 0.763351  | 2.812803  |
| 33 | 1 | 0 | -1.974843 | 0.338458  | -2.190106 |
| 34 | 1 | 0 | -0.777708 | -0.413767 | -3.224856 |
| 35 | 1 | 0 | -0.981299 | -1.190626 | 0.420516  |
| 36 | 1 | 0 | -2.130367 | -2.373066 | -3.559919 |
| 37 | 1 | 0 | -2.922997 | -4.554109 | -2.693993 |
| 38 | 1 | 0 | 0.898210  | 2.231008  | -1.223076 |
| 39 | 1 | 0 | -0.021762 | 2.049818  | -2.703231 |
| 40 | 1 | 0 | -1.574184 | 1.140315  | 0.540453  |
| 41 | 1 | 0 | -0.976273 | 4.217493  | -2.399357 |
| 42 | 1 | 0 | -2.739351 | 5.610308  | -1.353029 |
| 43 | 1 | 0 | -2.249655 | 1.184045  | 2.799813  |
| 44 | 1 | 0 | -3.969361 | 1.174140  | 3.280857  |
| 45 | 1 | 0 | -3.478796 | 0.419108  | 1.738768  |
| 46 | 7 | 0 | 6.001133  | 0.052234  | -0.254189 |
| 47 | 8 | 0 | 6.776964  | -0.478005 | 0.533496  |
| 48 | 8 | 0 | 6.333881  | 0.482741  | -1.357162 |
| 49 | 7 | 0 | -1.779186 | -3.342419 | 1.678501  |
| 50 | 8 | 0 | -0.796133 | -2.901156 | 2.271804  |
| 51 | 8 | 0 | -2.693785 | -3.945623 | 2.229382  |

---

## S3.4 - Compound 4

2<sup>nd</sup> PA (-1,2)

Sum of electronic and thermal Enthalpies= -2125.928782

Frequencies -- 14.7043 17.4146 21.1402

| Center<br>Number | Atomic<br>Number | Atomic<br>Type | Coordinates (Angstroms) |           |           |
|------------------|------------------|----------------|-------------------------|-----------|-----------|
|                  |                  |                | X                       | Y         | Z         |
| 1                | 7                | 0              | 0.047604                | -0.050162 | -1.230154 |
| 2                | 6                | 0              | 1.079163                | -1.074912 | -1.431475 |
| 3                | 6                | 0              | 2.217947                | -0.966025 | -0.453803 |
| 4                | 6                | 0              | 3.548104                | -0.894207 | -0.910892 |
| 5                | 6                | 0              | 1.963232                | -0.975284 | 0.943979  |
| 6                | 6                | 0              | 4.589594                | -0.826966 | -0.015960 |
| 7                | 6                | 0              | 2.985878                | -0.912224 | 1.847408  |
| 8                | 6                | 0              | 4.370821                | -0.830112 | 1.428041  |
| 9                | 8                | 0              | 5.310682                | -0.770550 | 2.254851  |
| 10               | 6                | 0              | -1.213994               | -0.429172 | -1.908055 |
| 11               | 6                | 0              | -1.901000               | -1.629662 | -1.303014 |
| 12               | 6                | 0              | -2.491793               | -1.553003 | -0.033780 |
| 13               | 6                | 0              | -1.994340               | -2.853979 | -1.980220 |
| 14               | 6                | 0              | -3.126476               | -2.651037 | 0.524330  |
| 15               | 6                | 0              | -2.633961               | -3.951779 | -1.419818 |
| 16               | 6                | 0              | -3.239382               | -3.923393 | -0.126260 |
| 17               | 8                | 0              | -3.828152               | -4.950044 | 0.389692  |
| 18               | 6                | 0              | 0.526165                | 1.269334  | -1.691614 |
| 19               | 6                | 0              | -0.323164               | 2.430992  | -1.221300 |
| 20               | 6                | 0              | -0.430049               | 2.712617  | 0.151126  |
| 21               | 6                | 0              | -0.982879               | 3.255888  | -2.130549 |
| 22               | 6                | 0              | -1.184914               | 3.792030  | 0.594455  |
| 23               | 6                | 0              | -1.741542               | 4.345893  | -1.691764 |
| 24               | 6                | 0              | -1.846156               | 4.616449  | -0.336931 |
| 25               | 8                | 0              | -2.592178               | 5.687466  | 0.087721  |
| 26               | 8                | 0              | -1.358608               | 4.162821  | 1.901902  |
| 27               | 6                | 0              | -0.717608               | 3.391058  | 2.926433  |
| 28               | 1                | 0              | 0.604368                | -2.051405 | -1.277224 |
| 29               | 1                | 0              | 1.469479                | -1.068808 | -2.461754 |
| 30               | 1                | 0              | 3.745347                | -0.886423 | -1.976706 |
| 31               | 1                | 0              | 0.938049                | -1.042775 | 1.287886  |
| 32               | 1                | 0              | 2.802087                | -0.930256 | 2.915951  |
| 33               | 1                | 0              | -1.872655               | 0.440604  | -1.846804 |
| 34               | 1                | 0              | -1.032678               | -0.616400 | -2.980156 |
| 35               | 1                | 0              | -2.455109               | -0.622326 | 0.522739  |
| 36               | 1                | 0              | -1.555048               | -2.947260 | -2.970002 |
| 37               | 1                | 0              | -2.689468               | -4.887937 | -1.968264 |
| 38               | 1                | 0              | 1.542259                | 1.397819  | -1.307775 |
| 39               | 1                | 0              | 0.597310                | 1.295513  | -2.791704 |
| 40               | 1                | 0              | 0.082758                | 2.080941  | 0.865111  |
| 41               | 1                | 0              | -0.910943               | 3.052824  | -3.193780 |
| 42               | 1                | 0              | -2.256862               | 4.988274  | -2.397578 |
| 43               | 1                | 0              | -2.556884               | 5.731862  | 1.055291  |
| 44               | 1                | 0              | 0.369184                | 3.412418  | 2.807458  |
| 45               | 1                | 0              | -0.992154               | 3.865799  | 3.867286  |
| 46               | 1                | 0              | -1.075308               | 2.357903  | 2.917325  |

|    |    |   |           |           |           |
|----|----|---|-----------|-----------|-----------|
| 47 | 17 | 0 | -3.853874 | -2.467486 | 2.138597  |
| 48 | 17 | 0 | 6.234195  | -0.727379 | -0.590823 |

-----

2<sup>nd</sup> ETE (0,3)

Sum of electronic and thermal Enthalpies= -2125.757521

Frequencies -- 10.3450 17.1941 18.1255

-----

| Center<br>Number | Atomic<br>Number | Atomic<br>Type | Coordinates (Angstroms) |   |   |
|------------------|------------------|----------------|-------------------------|---|---|
|                  |                  |                | X                       | Y | Z |

-----

|    |   |   |           |           |           |
|----|---|---|-----------|-----------|-----------|
| 1  | 7 | 0 | 0.109760  | -0.077123 | -1.266066 |
| 2  | 6 | 0 | 1.174356  | -1.073576 | -1.453044 |
| 3  | 6 | 0 | 2.276139  | -0.963105 | -0.429574 |
| 4  | 6 | 0 | 3.622140  | -0.925781 | -0.840573 |
| 5  | 6 | 0 | 1.967603  | -0.943060 | 0.956812  |
| 6  | 6 | 0 | 4.631443  | -0.862753 | 0.090811  |
| 7  | 6 | 0 | 2.956714  | -0.882784 | 1.896771  |
| 8  | 6 | 0 | 4.357853  | -0.833519 | 1.526433  |
| 9  | 8 | 0 | 5.266913  | -0.771965 | 2.384564  |
| 10 | 6 | 0 | -1.106429 | -0.468716 | -1.987171 |
| 11 | 6 | 0 | -1.845728 | -1.612389 | -1.342244 |
| 12 | 6 | 0 | -2.113115 | -1.589854 | 0.044954  |
| 13 | 6 | 0 | -2.315573 | -2.695361 | -2.124073 |
| 14 | 6 | 0 | -2.815173 | -2.610594 | 0.630706  |
| 15 | 6 | 0 | -3.016107 | -3.725158 | -1.555579 |
| 16 | 6 | 0 | -3.309133 | -3.753014 | -0.136604 |
| 17 | 8 | 0 | -3.943576 | -4.695855 | 0.388610  |
| 18 | 6 | 0 | 0.571574  | 1.268100  | -1.677189 |
| 19 | 6 | 0 | -0.333758 | 2.389052  | -1.219378 |
| 20 | 6 | 0 | -0.440892 | 2.690906  | 0.149143  |
| 21 | 6 | 0 | -1.054454 | 3.152367  | -2.136696 |
| 22 | 6 | 0 | -1.256754 | 3.729512  | 0.580413  |
| 23 | 6 | 0 | -1.877041 | 4.199454  | -1.709578 |
| 24 | 6 | 0 | -1.982784 | 4.489291  | -0.358798 |
| 25 | 8 | 0 | -2.789520 | 5.516589  | 0.056562  |
| 26 | 8 | 0 | -1.436645 | 4.119364  | 1.880502  |
| 27 | 6 | 0 | -0.729058 | 3.419508  | 2.913114  |
| 28 | 1 | 0 | 0.729579  | -2.069583 | -1.345135 |
| 29 | 1 | 0 | 1.601661  | -1.026387 | -2.466461 |
| 30 | 1 | 0 | 3.857229  | -0.940613 | -1.898494 |
| 31 | 1 | 0 | 0.929010  | -0.983484 | 1.261890  |
| 32 | 1 | 0 | 2.733972  | -0.875658 | 2.957892  |
| 33 | 1 | 0 | -1.780907 | 0.395668  | -1.996383 |
| 34 | 1 | 0 | -0.896962 | -0.714737 | -3.039773 |
| 35 | 1 | 0 | -1.762932 | -0.755565 | 0.639164  |
| 36 | 1 | 0 | -2.105273 | -2.703783 | -3.188090 |
| 37 | 1 | 0 | -3.373004 | -4.563414 | -2.143377 |
| 38 | 1 | 0 | 1.564919  | 1.410445  | -1.243164 |
| 39 | 1 | 0 | 0.689936  | 1.318727  | -2.771304 |
| 40 | 1 | 0 | 0.122895  | 2.110871  | 0.868750  |
| 41 | 1 | 0 | -0.977927 | 2.935463  | -3.196779 |
| 42 | 1 | 0 | -2.439553 | 4.794277  | -2.420870 |
| 43 | 1 | 0 | -2.745815 | 5.577730  | 1.022992  |

|    |    |   |           |           |           |
|----|----|---|-----------|-----------|-----------|
| 44 | 1  | 0 | 0.351713  | 3.510731  | 2.774401  |
| 45 | 1  | 0 | -1.020424 | 3.899287  | 3.846224  |
| 46 | 1  | 0 | -1.016840 | 2.364942  | 2.936016  |
| 47 | 17 | 0 | -3.158815 | -2.572655 | 2.341122  |
| 48 | 17 | 0 | 6.295829  | -0.804260 | -0.422028 |

-----

3<sup>rd</sup> PA (-1,3)

Sum of electronic and thermal Enthalpies= -2125.305961

Frequencies -- 15.5002 17.5003 20.5369

-----

| Center<br>Number | Atomic<br>Number | Atomic<br>Type | Coordinates (Angstroms) |   |   |
|------------------|------------------|----------------|-------------------------|---|---|
|                  |                  |                | X                       | Y | Z |

|    |   |   |           |           |           |
|----|---|---|-----------|-----------|-----------|
| 1  | 7 | 0 | 0.061054  | -0.038196 | -1.195387 |
| 2  | 6 | 0 | 1.066059  | -1.091412 | -1.399377 |
| 3  | 6 | 0 | 2.248556  | -0.955398 | -0.479229 |
| 4  | 6 | 0 | 3.554410  | -0.876005 | -0.999750 |
| 5  | 6 | 0 | 2.059626  | -0.932956 | 0.928545  |
| 6  | 6 | 0 | 4.635151  | -0.767225 | -0.156371 |
| 7  | 6 | 0 | 3.122188  | -0.830202 | 1.781237  |
| 8  | 6 | 0 | 4.484126  | -0.734086 | 1.295461  |
| 9  | 8 | 0 | 5.460267  | -0.632766 | 2.075406  |
| 10 | 6 | 0 | -1.235257 | -0.409726 | -1.813314 |
| 11 | 6 | 0 | -1.907491 | -1.599114 | -1.176237 |
| 12 | 6 | 0 | -2.373966 | -1.542881 | 0.145780  |
| 13 | 6 | 0 | -2.124224 | -2.790761 | -1.884531 |
| 14 | 6 | 0 | -3.012683 | -2.628565 | 0.720208  |
| 15 | 6 | 0 | -2.772241 | -3.874368 | -1.309448 |
| 16 | 6 | 0 | -3.261467 | -3.863224 | 0.033537  |
| 17 | 8 | 0 | -3.867611 | -4.869772 | 0.562517  |
| 18 | 6 | 0 | 0.533284  | 1.247786  | -1.729398 |
| 19 | 6 | 0 | -0.257875 | 2.441692  | -1.250296 |
| 20 | 6 | 0 | -0.562651 | 2.595338  | 0.108152  |
| 21 | 6 | 0 | -0.644721 | 3.445923  | -2.178945 |
| 22 | 6 | 0 | -1.241424 | 3.719675  | 0.553664  |
| 23 | 6 | 0 | -1.313788 | 4.567606  | -1.770070 |
| 24 | 6 | 0 | -1.652759 | 4.775064  | -0.384745 |
| 25 | 8 | 0 | -2.265123 | 5.798130  | 0.017270  |
| 26 | 8 | 0 | -1.577898 | 3.963527  | 1.826529  |
| 27 | 6 | 0 | -1.225054 | 3.008419  | 2.845148  |
| 28 | 1 | 0 | 0.578571  | -2.049135 | -1.181642 |
| 29 | 1 | 0 | 1.407802  | -1.135236 | -2.445348 |
| 30 | 1 | 0 | 3.702110  | -0.894019 | -2.073437 |
| 31 | 1 | 0 | 1.053295  | -1.008887 | 1.322966  |
| 32 | 1 | 0 | 2.988377  | -0.823268 | 2.857312  |
| 33 | 1 | 0 | -1.880058 | 0.470412  | -1.727048 |
| 34 | 1 | 0 | -1.103719 | -0.603277 | -2.890858 |
| 35 | 1 | 0 | -2.236672 | -0.638769 | 0.729030  |
| 36 | 1 | 0 | -1.777994 | -2.866101 | -2.911918 |
| 37 | 1 | 0 | -2.927798 | -4.783995 | -1.882463 |
| 38 | 1 | 0 | 1.570754  | 1.387637  | -1.404542 |
| 39 | 1 | 0 | 0.549258  | 1.242336  | -2.831119 |
| 40 | 1 | 0 | -0.258365 | 1.826204  | 0.804417  |



|    |    |   |           |           |           |
|----|----|---|-----------|-----------|-----------|
| 41 | 1  | 0 | -0.403703 | 3.308902  | -3.227775 |
| 42 | 1  | 0 | -1.616102 | 5.335988  | -2.473130 |
| 43 | 1  | 0 | -0.140182 | 2.894427  | 2.902497  |
| 44 | 1  | 0 | -1.605348 | 3.425907  | 3.775203  |
| 45 | 1  | 0 | -1.699268 | 2.044696  | 2.646708  |
| 46 | 17 | 0 | -3.570548 | -2.486509 | 2.402086  |
| 47 | 17 | 0 | 6.248793  | -0.652132 | -0.810776 |

-----

3<sup>rd</sup> ETE (0,4)

Sum of electronic and thermal Enthalpies= -2125.133321

Frequencies -- 14.1092 16.0226 19.8566

-----

| Center Number | Atomic Number | Atomic Type | Coordinates (Angstroms) |   |   |
|---------------|---------------|-------------|-------------------------|---|---|
|               |               |             | X                       | Y | Z |

|    |   |   |           |           |           |
|----|---|---|-----------|-----------|-----------|
| 1  | 7 | 0 | 0.156880  | -0.066532 | -1.262032 |
| 2  | 6 | 0 | 1.215293  | -1.070335 | -1.437821 |
| 3  | 6 | 0 | 2.383973  | -0.880872 | -0.503707 |
| 4  | 6 | 0 | 3.698018  | -0.972884 | -1.000860 |
| 5  | 6 | 0 | 2.174838  | -0.661652 | 0.883516  |
| 6  | 6 | 0 | 4.772097  | -0.853258 | -0.151586 |
| 7  | 6 | 0 | 3.230054  | -0.540283 | 1.742915  |
| 8  | 6 | 0 | 4.602158  | -0.627724 | 1.282557  |
| 9  | 8 | 0 | 5.571816  | -0.519836 | 2.066583  |
| 10 | 6 | 0 | -1.097391 | -0.509830 | -1.876858 |
| 11 | 6 | 0 | -1.825065 | -1.582693 | -1.107880 |
| 12 | 6 | 0 | -1.769000 | -1.630337 | 0.300028  |
| 13 | 6 | 0 | -2.622278 | -2.524499 | -1.806926 |
| 14 | 6 | 0 | -2.477910 | -2.582275 | 0.988362  |
| 15 | 6 | 0 | -3.334456 | -3.480904 | -1.137408 |
| 16 | 6 | 0 | -3.305997 | -3.576724 | 0.308838  |
| 17 | 8 | 0 | -3.948469 | -4.455446 | 0.927075  |
| 18 | 6 | 0 | 0.572847  | 1.238862  | -1.786862 |
| 19 | 6 | 0 | -0.238157 | 2.409591  | -1.284062 |
| 20 | 6 | 0 | -0.791561 | 2.415935  | -0.000355 |
| 21 | 6 | 0 | -0.380917 | 3.549163  | -2.124264 |
| 22 | 6 | 0 | -1.476048 | 3.532530  | 0.463342  |
| 23 | 6 | 0 | -1.050562 | 4.662015  | -1.697191 |
| 24 | 6 | 0 | -1.639700 | 4.724174  | -0.382810 |
| 25 | 8 | 0 | -2.263557 | 5.734202  | 0.032877  |
| 26 | 8 | 0 | -2.032131 | 3.646227  | 1.674510  |
| 27 | 6 | 0 | -1.929328 | 2.553477  | 2.607580  |
| 28 | 1 | 0 | 0.785775  | -2.056334 | -1.225055 |
| 29 | 1 | 0 | 1.573778  | -1.103760 | -2.477818 |
| 30 | 1 | 0 | 3.857987  | -1.134471 | -2.060607 |
| 31 | 1 | 0 | 1.159978  | -0.598294 | 1.255999  |
| 32 | 1 | 0 | 3.083076  | -0.382002 | 2.805462  |
| 33 | 1 | 0 | -1.770500 | 0.354302  | -1.939077 |
| 34 | 1 | 0 | -0.944693 | -0.850176 | -2.913494 |
| 35 | 1 | 0 | -1.160321 | -0.908766 | 0.828821  |
| 36 | 1 | 0 | -2.656133 | -2.480830 | -2.890246 |
| 37 | 1 | 0 | -3.941677 | -4.209599 | -1.662576 |
| 38 | 1 | 0 | 1.612579  | 1.409381  | -1.482982 |

|    |    |   |           |           |           |
|----|----|---|-----------|-----------|-----------|
| 39 | 1  | 0 | 0.573579  | 1.248310  | -2.888691 |
| 40 | 1  | 0 | -0.676343 | 1.541008  | 0.623987  |
| 41 | 1  | 0 | 0.050559  | 3.522507  | -3.119305 |
| 42 | 1  | 0 | -1.167188 | 5.533216  | -2.332335 |
| 43 | 1  | 0 | -0.881859 | 2.341871  | 2.833518  |
| 44 | 1  | 0 | -2.442699 | 2.892757  | 3.504913  |
| 45 | 1  | 0 | -2.421907 | 1.663717  | 2.209417  |
| 46 | 17 | 0 | -2.418029 | -2.630012 | 2.730403  |
| 47 | 17 | 0 | 6.396278  | -0.961235 | -0.771376 |

### S3.5 - Compound 5

2<sup>nd</sup> PA (-1,2)

Sum of electronic and thermal Enthalpies= -6353.767778

Frequencies -- 13.6037 15.0954 20.4955

| Center<br>Number | Atomic<br>Number | Atomic<br>Type | Coordinates (Angstroms) |           |           |
|------------------|------------------|----------------|-------------------------|-----------|-----------|
|                  |                  |                | X                       | Y         | Z         |
| 1                | 7                | 0              | -0.043640               | 0.193451  | 1.302274  |
| 2                | 6                | 0              | -1.013453               | -0.925190 | 1.386187  |
| 3                | 6                | 0              | -2.046645               | -0.930965 | 0.287454  |
| 4                | 6                | 0              | -3.408320               | -0.774315 | 0.571071  |
| 5                | 6                | 0              | -1.689614               | -1.118283 | -1.058643 |
| 6                | 6                | 0              | -4.363129               | -0.796143 | -0.438850 |
| 7                | 6                | 0              | -2.640584               | -1.132527 | -2.064471 |
| 8                | 6                | 0              | -4.045546               | -0.964186 | -1.825088 |
| 9                | 8                | 0              | -4.904470               | -0.971568 | -2.783500 |
| 10               | 6                | 0              | 1.078542                | -0.035707 | 2.217514  |
| 11               | 6                | 0              | 1.997580                | -1.147337 | 1.783527  |
| 12               | 6                | 0              | 2.478427                | -1.192564 | 0.454762  |
| 13               | 6                | 0              | 2.432133                | -2.126959 | 2.708015  |
| 14               | 6                | 0              | 3.347850                | -2.177053 | 0.061006  |
| 15               | 6                | 0              | 3.300455                | -3.117063 | 2.332903  |
| 16               | 6                | 0              | 3.815788                | -3.211944 | 0.980849  |
| 17               | 8                | 0              | 4.606680                | -4.122583 | 0.643029  |
| 18               | 6                | 0              | -0.690052               | 1.491615  | 1.578319  |
| 19               | 6                | 0              | 0.146182                | 2.685965  | 1.171114  |
| 20               | 6                | 0              | 0.404697                | 2.926110  | -0.189242 |
| 21               | 6                | 0              | 0.653097                | 3.573709  | 2.118806  |
| 22               | 6                | 0              | 1.156942                | 4.026307  | -0.582456 |
| 23               | 6                | 0              | 1.410236                | 4.684002  | 1.730084  |
| 24               | 6                | 0              | 1.665346                | 4.912464  | 0.387633  |
| 25               | 8                | 0              | 2.407693                | 6.003777  | 0.011095  |
| 26               | 8                | 0              | 1.467601                | 4.361891  | -1.873919 |
| 27               | 6                | 0              | 0.981444                | 3.529480  | -2.935925 |
| 28               | 1                | 0              | -0.425473               | -1.848268 | 1.339476  |
| 29               | 1                | 0              | -1.519504               | -0.923307 | 2.366403  |
| 30               | 1                | 0              | -3.723985               | -0.633581 | 1.599594  |
| 31               | 1                | 0              | -0.644372               | -1.257999 | -1.319698 |
| 32               | 1                | 0              | -2.338153               | -1.280855 | -3.097705 |
| 33               | 1                | 0              | 1.671996                | 0.885904  | 2.255695  |
| 34               | 1                | 0              | 0.734801                | -0.230138 | 3.246807  |
| 35               | 1                | 0              | 2.149761                | -0.434766 | -0.244772 |

|    |    |   |           |           |           |
|----|----|---|-----------|-----------|-----------|
| 36 | 1  | 0 | 2.060615  | -2.088529 | 3.726402  |
| 37 | 1  | 0 | 3.632568  | -3.875460 | 3.033279  |
| 38 | 1  | 0 | -1.627279 | 1.505162  | 1.017610  |
| 39 | 1  | 0 | -0.954225 | 1.578979  | 2.645490  |
| 40 | 1  | 0 | 0.006784  | 2.247893  | -0.933443 |
| 41 | 1  | 0 | 0.459096  | 3.406266  | 3.172969  |
| 42 | 1  | 0 | 1.806479  | 5.375582  | 2.465672  |
| 43 | 1  | 0 | 2.486855  | 6.011014  | -0.954931 |
| 44 | 1  | 0 | -0.111682 | 3.505299  | -2.942185 |
| 45 | 1  | 0 | 1.343382  | 3.985547  | -3.856206 |
| 46 | 1  | 0 | 1.377837  | 2.514306  | -2.847591 |
| 47 | 35 | 0 | 3.991176  | -2.216336 | -1.733204 |
| 48 | 35 | 0 | -6.221110 | -0.585091 | 0.070058  |

-----

2<sup>nd</sup> ETE (0,3)

Sum of electronic and thermal Enthalpies= -6353.597965

Frequencies -- 11.7730 15.8548 17.4524

-----

| Center Number | Atomic Number | Atomic Type | Coordinates (Angstroms) |   |   |
|---------------|---------------|-------------|-------------------------|---|---|
|               |               |             | X                       | Y | Z |

|    |   |   |           |           |           |
|----|---|---|-----------|-----------|-----------|
| 1  | 7 | 0 | -0.106912 | 0.227454  | 1.295342  |
| 2  | 6 | 0 | -1.099737 | -0.845476 | 1.450876  |
| 3  | 6 | 0 | -2.109395 | -0.897294 | 0.332067  |
| 4  | 6 | 0 | -3.483384 | -0.994652 | 0.628951  |
| 5  | 6 | 0 | -1.687716 | -0.902933 | -1.023267 |
| 6  | 6 | 0 | -4.411961 | -1.095069 | -0.380325 |
| 7  | 6 | 0 | -2.594196 | -1.004636 | -2.040231 |
| 8  | 6 | 0 | -4.020589 | -1.108290 | -1.789210 |
| 9  | 8 | 0 | -4.844957 | -1.204846 | -2.724787 |
| 10 | 6 | 0 | 1.045160  | -0.001078 | 2.172660  |
| 11 | 6 | 0 | 1.947629  | -1.120061 | 1.721723  |
| 12 | 6 | 0 | 2.279445  | -1.267742 | 0.356352  |
| 13 | 6 | 0 | 2.514355  | -2.002721 | 2.673119  |
| 14 | 6 | 0 | 3.137309  | -2.258715 | -0.047960 |
| 15 | 6 | 0 | 3.371859  | -2.997473 | 2.289072  |
| 16 | 6 | 0 | 3.739327  | -3.196183 | 0.899553  |
| 17 | 8 | 0 | 4.519183  | -4.111025 | 0.553486  |
| 18 | 6 | 0 | -0.725244 | 1.547545  | 1.552971  |
| 19 | 6 | 0 | 0.146382  | 2.719667  | 1.162486  |
| 20 | 6 | 0 | 0.470280  | 2.940617  | -0.187115 |
| 21 | 6 | 0 | 0.619585  | 3.611704  | 2.123931  |
| 22 | 6 | 0 | 1.255908  | 4.026043  | -0.555443 |
| 23 | 6 | 0 | 1.407252  | 4.707943  | 1.759820  |
| 24 | 6 | 0 | 1.728494  | 4.917799  | 0.428346  |
| 25 | 8 | 0 | 2.501481  | 5.993912  | 0.077195  |
| 26 | 8 | 0 | 1.632894  | 4.342410  | -1.832874 |
| 27 | 6 | 0 | 1.197595  | 3.499011  | -2.907676 |
| 28 | 1 | 0 | -0.566739 | -1.803639 | 1.450645  |
| 29 | 1 | 0 | -1.621763 | -0.775788 | 2.417702  |
| 30 | 1 | 0 | -3.798649 | -0.983783 | 1.665648  |
| 31 | 1 | 0 | -0.629286 | -0.834053 | -1.243054 |
| 32 | 1 | 0 | -2.283689 | -1.021084 | -3.079108 |

|    |    |   |           |           |           |
|----|----|---|-----------|-----------|-----------|
| 33 | 1  | 0 | 1.644725  | 0.917353  | 2.182802  |
| 34 | 1  | 0 | 0.736852  | -0.180909 | 3.214876  |
| 35 | 1  | 0 | 1.847505  | -0.583604 | -0.362314 |
| 36 | 1  | 0 | 2.253829  | -1.884360 | 3.719395  |
| 37 | 1  | 0 | 3.806226  | -3.682550 | 3.008633  |
| 38 | 1  | 0 | -1.653632 | 1.581496  | 0.975905  |
| 39 | 1  | 0 | -1.005140 | 1.642296  | 2.614455  |
| 40 | 1  | 0 | 0.099822  | 2.260031  | -0.943132 |
| 41 | 1  | 0 | 0.375023  | 3.457301  | 3.169395  |
| 42 | 1  | 0 | 1.776570  | 5.403114  | 2.505803  |
| 43 | 1  | 0 | 2.627898  | 5.990641  | -0.883706 |
| 44 | 1  | 0 | 0.106373  | 3.488213  | -2.976298 |
| 45 | 1  | 0 | 1.616949  | 3.936163  | -3.812553 |
| 46 | 1  | 0 | 1.575767  | 2.480851  | -2.781456 |
| 47 | 35 | 0 | 3.585310  | -2.437845 | -1.890252 |
| 48 | 35 | 0 | -6.263193 | -1.209749 | 0.040820  |

-----

3<sup>rd</sup> PA (-1,3)

Sum of electronic and thermal Enthalpies= -6353.144959  
 Frequencies -- 14.2195 15.3624 16.6257

-----

| Center<br>Number | Atomic<br>Number | Atomic<br>Type | Coordinates (Angstroms) |           |           |
|------------------|------------------|----------------|-------------------------|-----------|-----------|
|                  |                  |                | X                       | Y         | Z         |
| 1                | 7                | 0              | -0.029856               | 0.263786  | 1.253012  |
| 2                | 6                | 0              | -0.960412               | -0.861413 | 1.434725  |
| 3                | 6                | 0              | -2.055600               | -0.893163 | 0.404936  |
| 4                | 6                | 0              | -3.407206               | -0.857677 | 0.799943  |
| 5                | 6                | 0              | -1.742507               | -0.988771 | -0.976260 |
| 6                | 6                | 0              | -4.414192               | -0.908915 | -0.136243 |
| 7                | 6                | 0              | -2.729398               | -1.046838 | -1.920198 |
| 8                | 6                | 0              | -4.135926               | -1.008940 | -1.565823 |
| 9                | 8                | 0              | -5.034860               | -1.063831 | -2.437426 |
| 10               | 6                | 0              | 1.205799                | 0.057501  | 2.049947  |
| 11               | 6                | 0              | 2.042514                | -1.111747 | 1.600395  |
| 12               | 6                | 0              | 2.698352                | -1.093651 | 0.359495  |
| 13               | 6                | 0              | 2.223568                | -2.246832 | 2.406438  |
| 14               | 6                | 0              | 3.481430                | -2.158959 | -0.052433 |
| 15               | 6                | 0              | 3.009747                | -3.311576 | 1.996378  |
| 16               | 6                | 0              | 3.692163                | -3.343264 | 0.736009  |
| 17               | 8                | 0              | 4.413629                | -4.341431 | 0.373989  |
| 18               | 6                | 0              | -0.670867               | 1.535124  | 1.623208  |
| 19               | 6                | 0              | 0.084066                | 2.761251  | 1.169055  |
| 20               | 6                | 0              | 0.539431                | 2.869785  | -0.151542 |
| 21               | 6                | 0              | 0.284513                | 3.837114  | 2.075884  |
| 22               | 6                | 0              | 1.188311                | 4.018591  | -0.579086 |
| 23               | 6                | 0              | 0.920441                | 4.983928  | 1.683912  |
| 24               | 6                | 0              | 1.411443                | 5.146136  | 0.338975  |
| 25               | 8                | 0              | 2.000764                | 6.189269  | -0.045953 |
| 26               | 8                | 0              | 1.659758                | 4.225016  | -1.815365 |
| 27               | 6                | 0              | 1.506484                | 3.195564  | -2.810358 |
| 28               | 1                | 0              | -0.372889               | -1.781640 | 1.334626  |
| 29               | 1                | 0              | -1.397945               | -0.867365 | 2.445531  |

|    |    |   |           |           |           |
|----|----|---|-----------|-----------|-----------|
| 30 | 1  | 0 | -3.643908 | -0.783183 | 1.854771  |
| 31 | 1  | 0 | -0.701911 | -1.026863 | -1.277241 |
| 32 | 1  | 0 | -2.499001 | -1.132870 | -2.976504 |
| 33 | 1  | 0 | 1.784490  | 0.982361  | 1.964740  |
| 34 | 1  | 0 | 0.954906  | -0.064854 | 3.116704  |
| 35 | 1  | 0 | 2.592259  | -0.228977 | -0.286299 |
| 36 | 1  | 0 | 1.735054  | -2.291423 | 3.376261  |
| 37 | 1  | 0 | 3.131861  | -4.178758 | 2.639372  |
| 38 | 1  | 0 | -1.660128 | 1.561943  | 1.152204  |
| 39 | 1  | 0 | -0.839320 | 1.596325  | 2.710417  |
| 40 | 1  | 0 | 0.375933  | 2.045451  | -0.832023 |
| 41 | 1  | 0 | -0.072583 | 3.734859  | 3.095147  |
| 42 | 1  | 0 | 1.081685  | 5.806962  | 2.371476  |
| 43 | 1  | 0 | 0.448401  | 2.992764  | -2.990999 |
| 44 | 1  | 0 | 1.967991  | 3.594797  | -3.711255 |
| 45 | 1  | 0 | 2.021051  | 2.283658  | -2.499431 |
| 46 | 35 | 0 | 4.342020  | -2.033192 | -1.780769 |
| 47 | 35 | 0 | -6.232629 | -0.838834 | 0.427250  |

-----

3<sup>rd</sup> ETE (0,4)

Sum of electronic and thermal Enthalpies= -6352.973704

Frequencies -- 11.7802 15.9313 18.3946

-----

| Center<br>Number | Atomic<br>Number | Atomic<br>Type | Coordinates (Angstroms) |           |           |
|------------------|------------------|----------------|-------------------------|-----------|-----------|
|                  |                  |                | X                       | Y         | Z         |
| 1                | 7                | 0              | -0.137324               | 0.220463  | 1.298124  |
| 2                | 6                | 0              | -1.113557               | -0.870485 | 1.443860  |
| 3                | 6                | 0              | -2.210582               | -0.835189 | 0.409279  |
| 4                | 6                | 0              | -3.555774               | -0.946308 | 0.811979  |
| 5                | 6                | 0              | -1.902516               | -0.732508 | -0.972287 |
| 6                | 6                | 0              | -4.566942               | -0.954858 | -0.120264 |
| 7                | 6                | 0              | -2.891840               | -0.743368 | -1.914437 |
| 8                | 6                | 0              | -4.293929               | -0.854484 | -1.553457 |
| 9                | 8                | 0              | -5.194515               | -0.865285 | -2.420899 |
| 10               | 6                | 0              | 1.076423                | -0.061094 | 2.070369  |
| 11               | 6                | 0              | 1.977339                | -1.111769 | 1.472924  |
| 12               | 6                | 0              | 2.041274                | -1.318135 | 0.079408  |
| 13               | 6                | 0              | 2.818109                | -1.868639 | 2.328008  |
| 14               | 6                | 0              | 2.905955                | -2.246515 | -0.446902 |
| 15               | 6                | 0              | 3.687920                | -2.794046 | 1.822609  |
| 16               | 6                | 0              | 3.789306                | -3.049324 | 0.397554  |
| 17               | 8                | 0              | 4.582449                | -3.901206 | -0.060405 |
| 18               | 6                | 0              | -0.725747               | 1.506313  | 1.686287  |
| 19               | 6                | 0              | 0.009010                | 2.727746  | 1.188226  |
| 20               | 6                | 0              | 0.819957                | 2.691917  | 0.051527  |
| 21               | 6                | 0              | -0.189140               | 3.956476  | 1.880314  |
| 22               | 6                | 0              | 1.433121                | 3.851295  | -0.409434 |
| 23               | 6                | 0              | 0.396133                | 5.113295  | 1.448351  |
| 24               | 6                | 0              | 1.242257                | 5.134915  | 0.281147  |
| 25               | 8                | 0              | 1.795772                | 6.185000  | -0.135703 |
| 26               | 8                | 0              | 2.226673                | 3.925367  | -1.483320 |
| 27               | 6                | 0              | 2.496266                | 2.735394  | -2.248661 |

|    |    |   |           |           |           |
|----|----|---|-----------|-----------|-----------|
| 28 | 1  | 0 | -0.578432 | -1.819321 | 1.324465  |
| 29 | 1  | 0 | -1.555749 | -0.883172 | 2.451464  |
| 30 | 1  | 0 | -3.783576 | -1.018853 | 1.868841  |
| 31 | 1  | 0 | -0.865494 | -0.652591 | -1.274473 |
| 32 | 1  | 0 | -2.669119 | -0.676003 | -2.973550 |
| 33 | 1  | 0 | 1.662869  | 0.863448  | 2.138424  |
| 34 | 1  | 0 | 0.838993  | -0.343381 | 3.108865  |
| 35 | 1  | 0 | 1.396607  | -0.734783 | -0.564632 |
| 36 | 1  | 0 | 2.759900  | -1.706546 | 3.399081  |
| 37 | 1  | 0 | 4.332508  | -3.380086 | 2.468155  |
| 38 | 1  | 0 | -1.741442 | 1.553408  | 1.275835  |
| 39 | 1  | 0 | -0.841399 | 1.581675  | 2.780087  |
| 40 | 1  | 0 | 0.962334  | 1.751823  | -0.462433 |
| 41 | 1  | 0 | -0.817757 | 3.962211  | 2.764713  |
| 42 | 1  | 0 | 0.250173  | 6.052607  | 1.970277  |
| 43 | 1  | 0 | 1.571501  | 2.333667  | -2.668634 |
| 44 | 1  | 0 | 3.161095  | 3.052914  | -3.049261 |
| 45 | 1  | 0 | 2.991236  | 1.986007  | -1.627252 |
| 46 | 35 | 0 | 2.983870  | -2.513732 | -2.329726 |
| 47 | 35 | 0 | -6.377285 | -1.087042 | 0.445146  |

---
